# Supplementary material
Source: PubMed Central journal article supplement (PMC3993930)

## Supporting Information

### **Tetramic acid analogues produced by co-culture of *Saccharopolyspora erythraea* with *Fusarium pallidoroeseum***

James Whitt,<sup>†</sup> Suzanne M. Shipley<sup>†</sup>, David J. Newman<sup>‡</sup> and Karina M. Zuck<sup>†,\*</sup>

<sup>†</sup>SAIC-Frederick, Inc., Frederick National Laboratory for Cancer Research, P.O. Box B,  
Frederick, MD, 21702

<sup>‡</sup>Natural Products Branch, Developmental Therapeutics Program, Frederick National Laboratory  
for Cancer Research, National Cancer Institute, P.O. Box B, Frederick, MD, 21702

---

\*To whom correspondence should be addressed. Tel: (301) 846-5688. FAX: (301) 846-5206. E-mail: zuckk@mail.nih.gov

## Table of Contents

- S3:  $^1\text{H}$  NMR Spectrum of Compound **1**
- S4:  $^{13}\text{C}$  NMR Spectrum of Compound **1**
- S5: COSY NMR Spectrum of Compound **1**
- S6: HSQC NMR Spectrum of Compound **1**
- S7: HMBC NMR Spectrum of Compound **1**
- S8: NOESY NMR Spectrum of Compound **1**
- S9: TROESY NMR Spectrum of Compound **1**
- S10:  $^1\text{H}$  NMR Spectrum of Compound **2**
- S11:  $^{13}\text{C}$  NMR Spectrum of Compound **2**
- S12: COSY NMR Spectrum of Compound **2**
- S13: HSQC NMR Spectrum of Compound **2**
- S14: HMBC NMR Spectrum of Compound **2**
- S15: NOESY NMR Spectrum of Compound **2**
- S16: TROESY NMR Spectrum of Compound **2**
- S17:  $^1\text{H}$  NMR Spectrum of Compound **3**
- S18:  $^{13}\text{C}$  NMR Spectrum of Compound **3**
- S19: COSY NMR Spectrum of Compound **3**
- S20: HSQC NMR Spectrum of Compound **3**
- S21: HMBC NMR Spectrum of Compound **3**
- S22: NOESY NMR Spectrum of Compound **3**
- S23: TROESY NMR Spectrum of Compound **3**
- S24: NCI-60 Cell Line Testing Results from Equisetin
- S25: CD Spectra of Compounds **1-3** and Ophiosetin Compared to Equisetin

S3:  $^1\text{H}$  NMR Spectrum of Compound **1**  
500 MHz in  $\text{DMSO-}d_6$

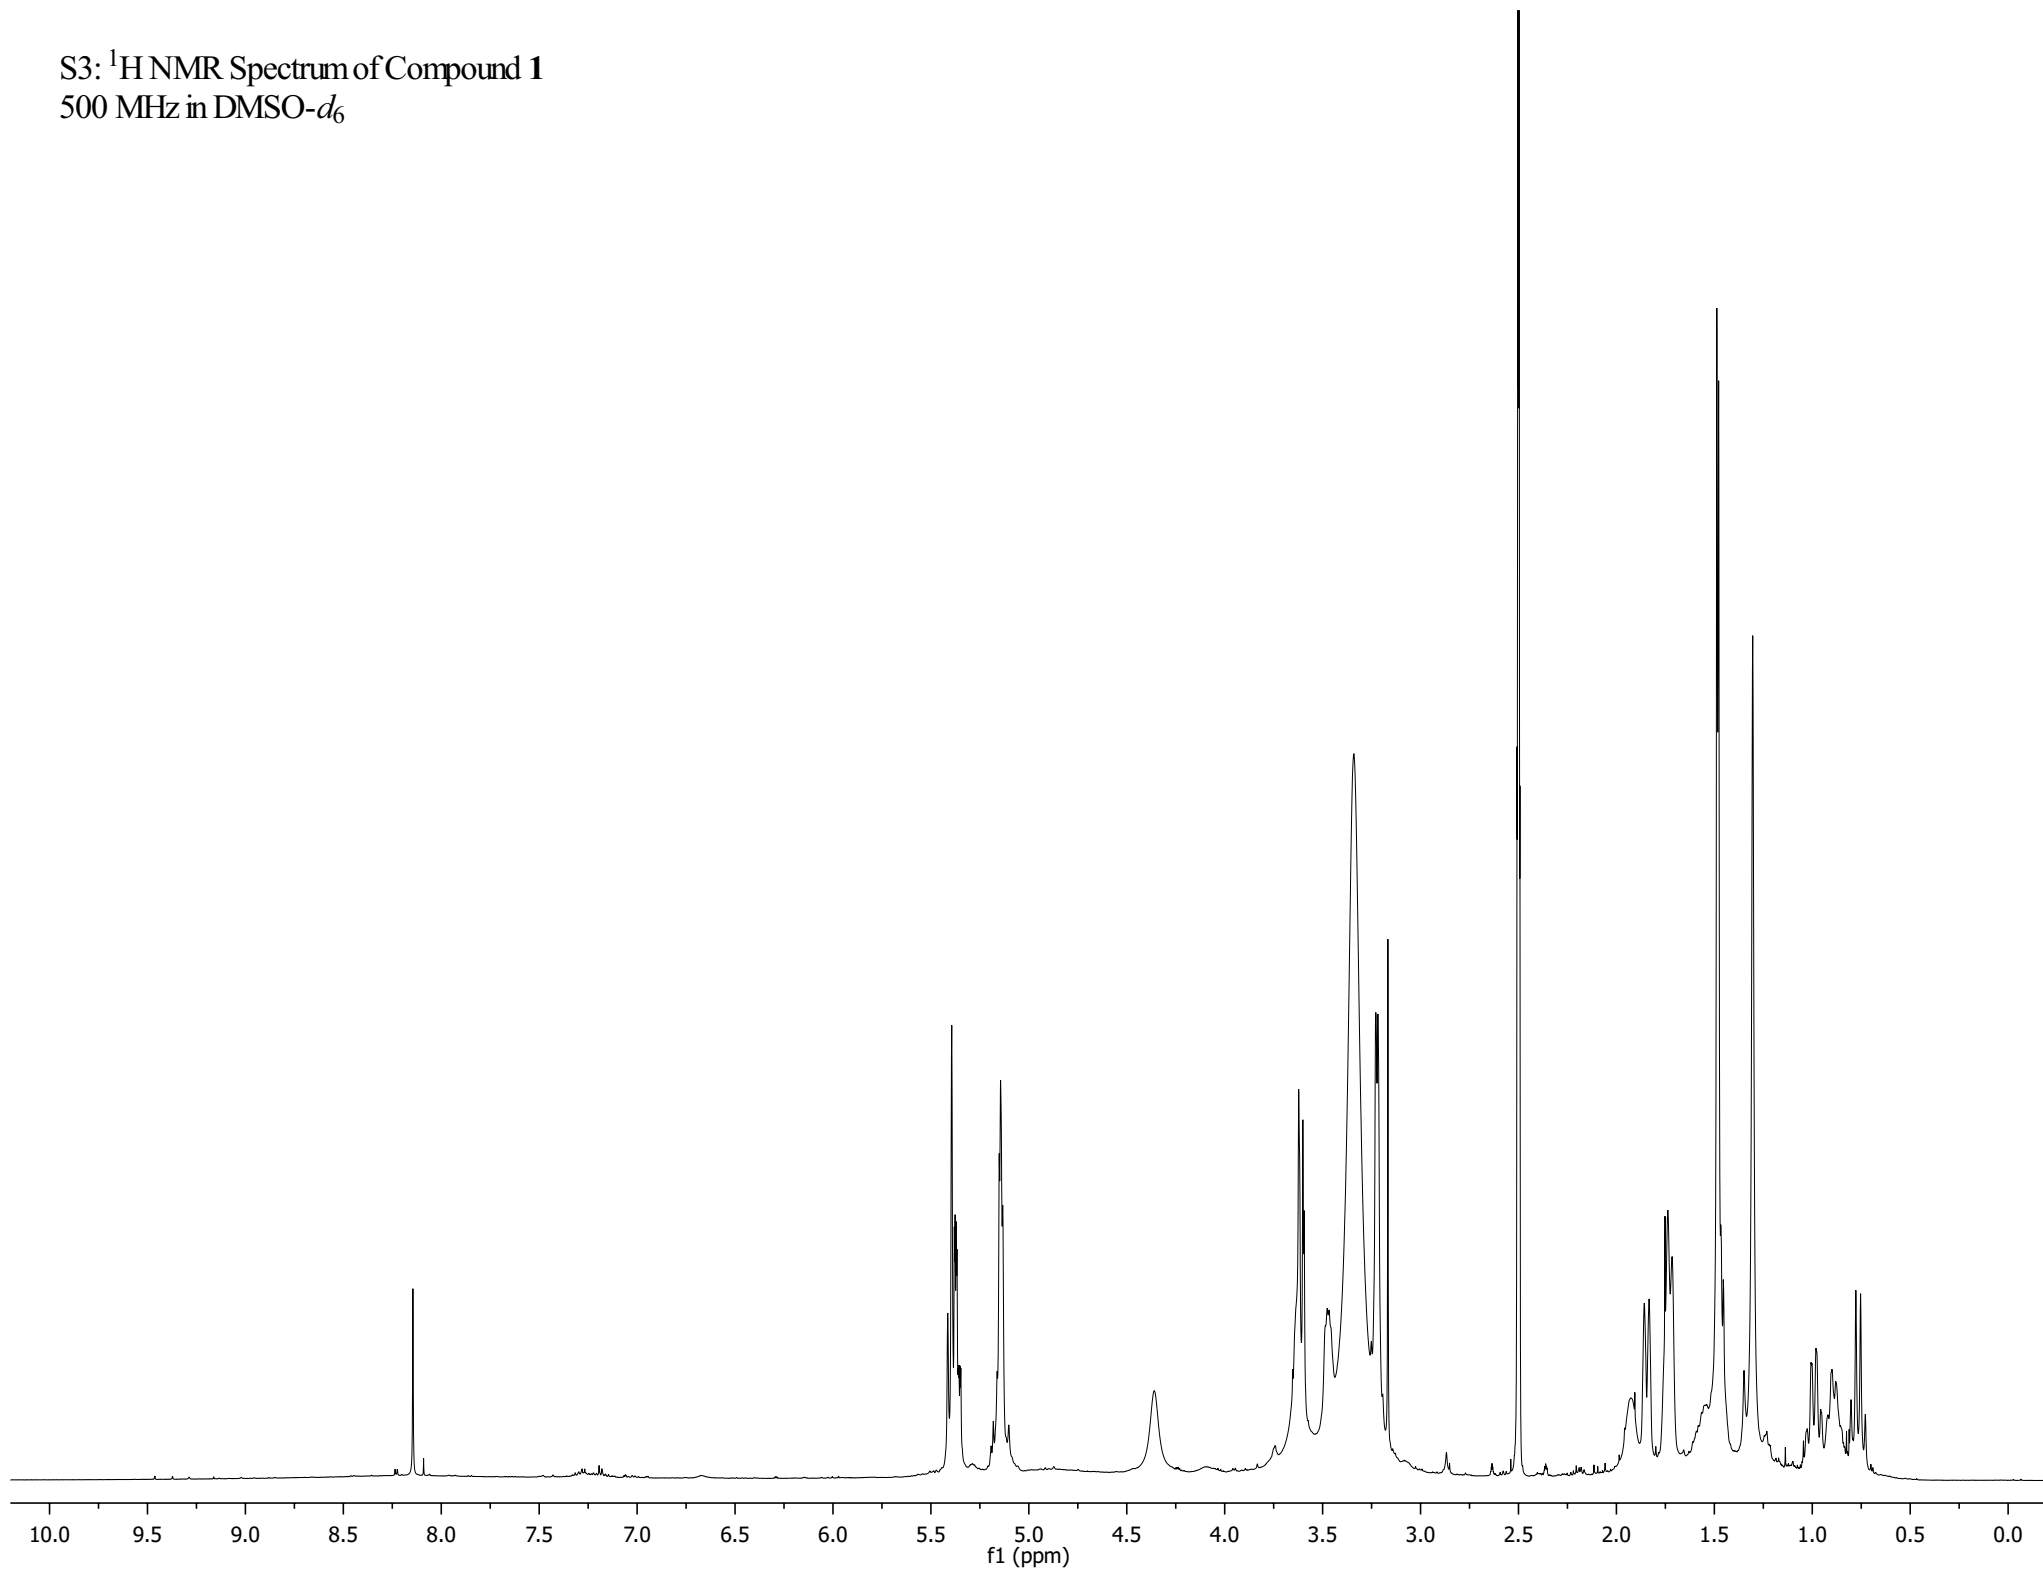

S4:  $^{13}\text{C}$  NMR Spectrum of Compound **1**  
150 MHz in  $\text{DMSO-}d_6$

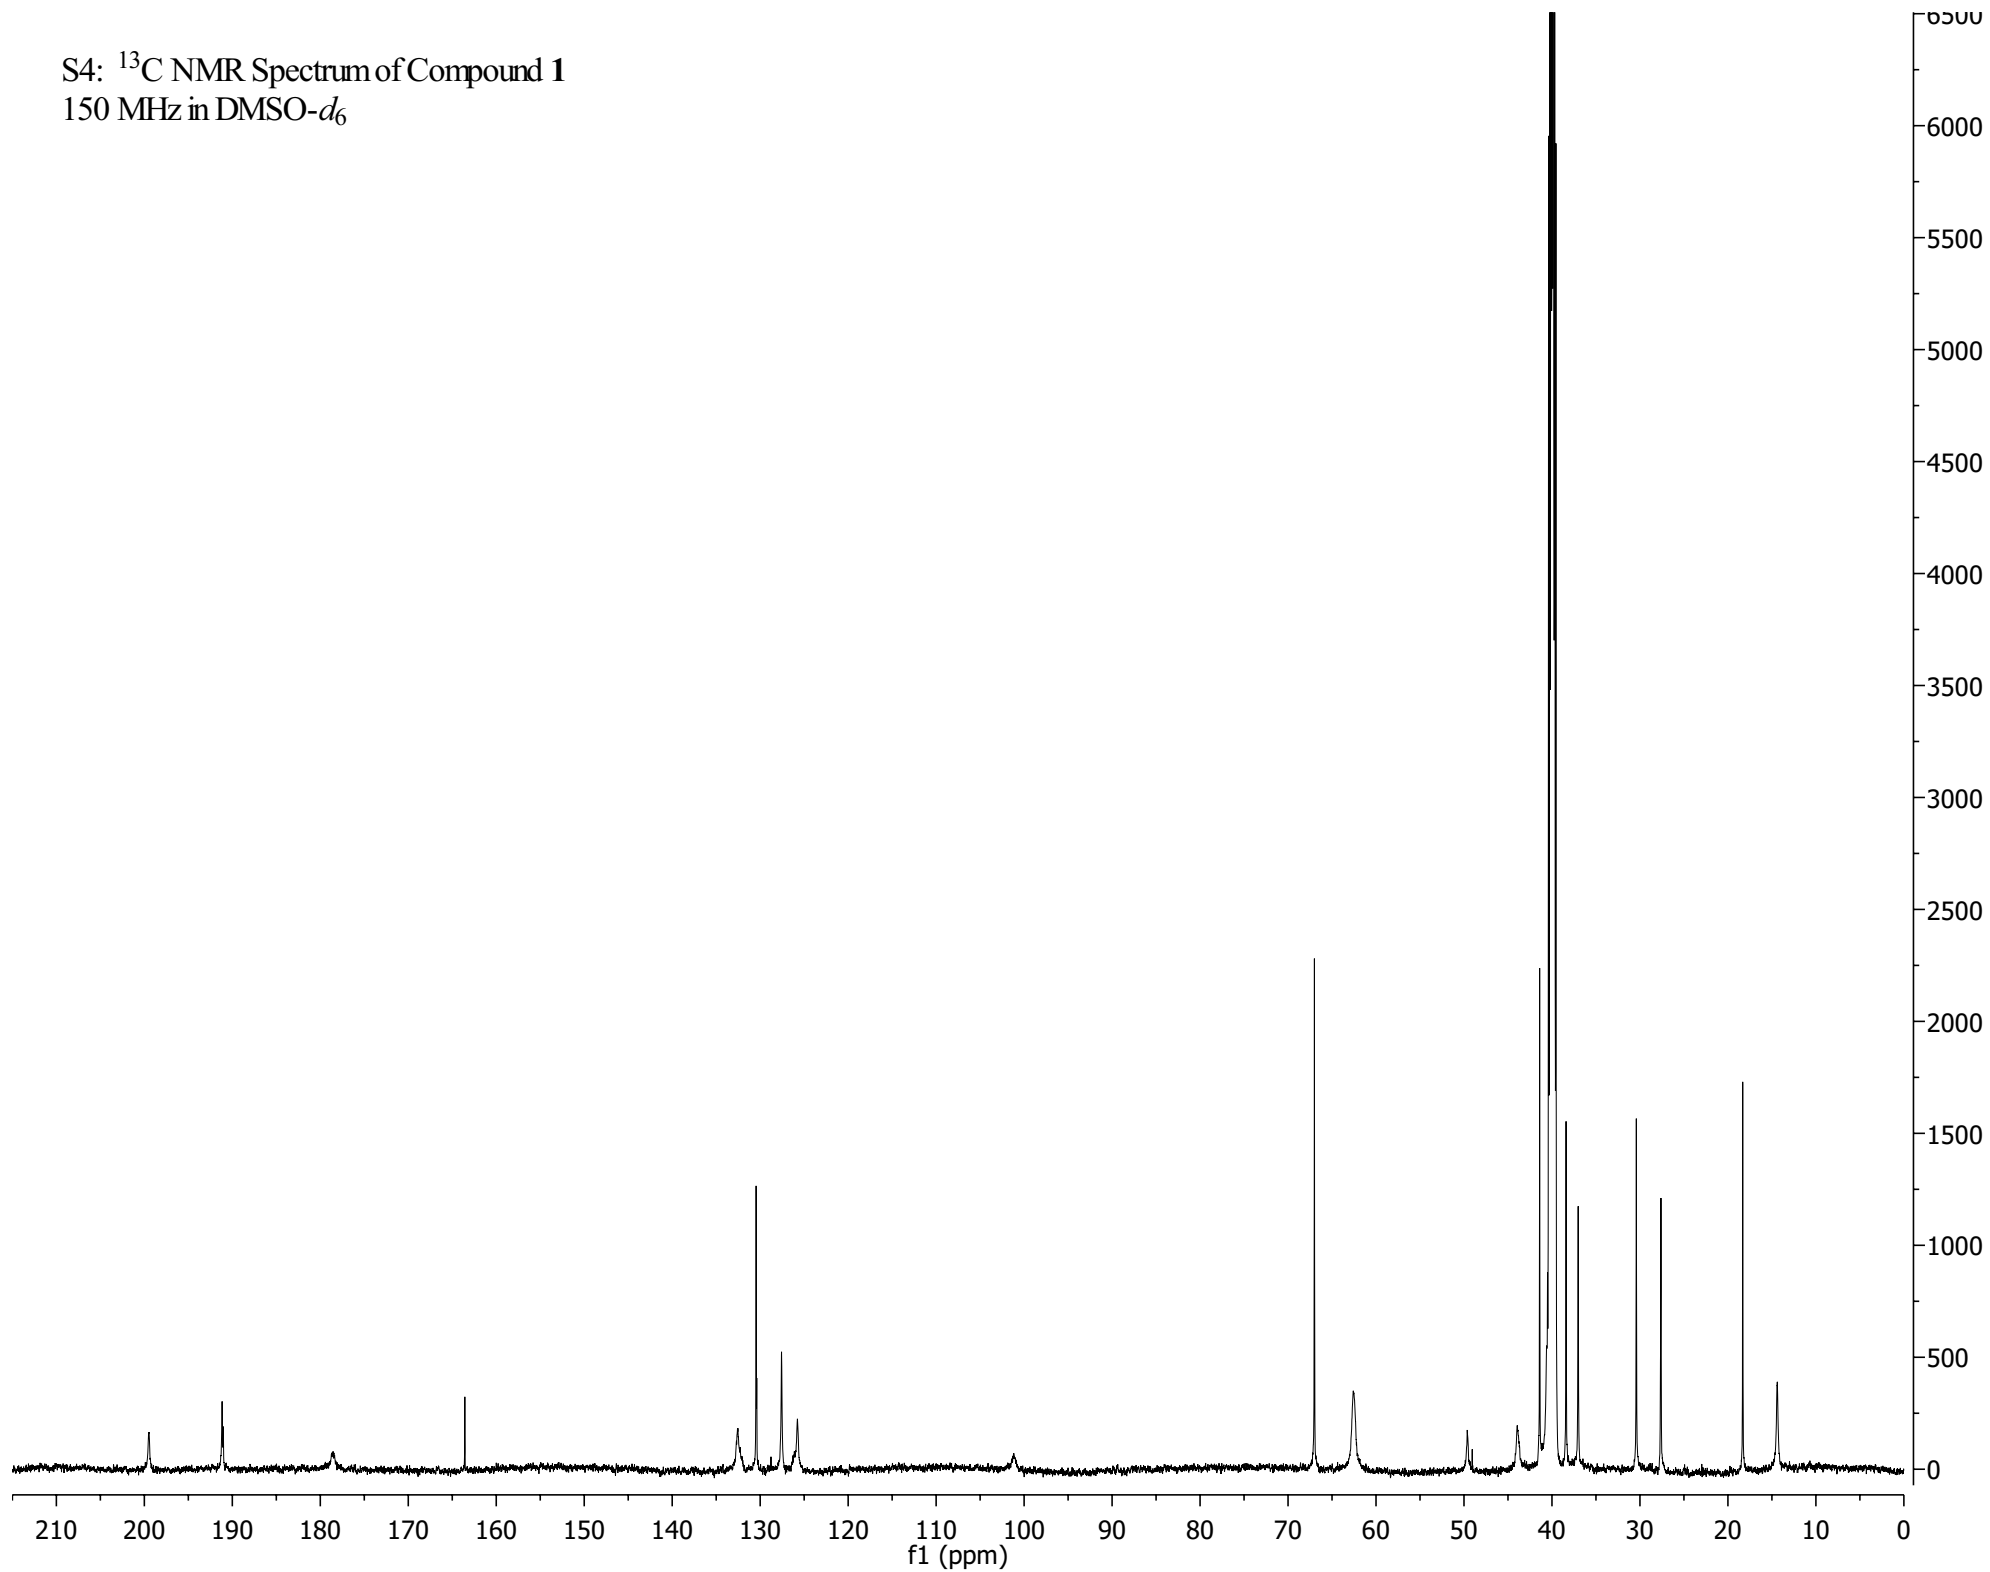

S5: COSY NMR Spectrum of Compound 1  
500 MHz in DMSO- $d_6$

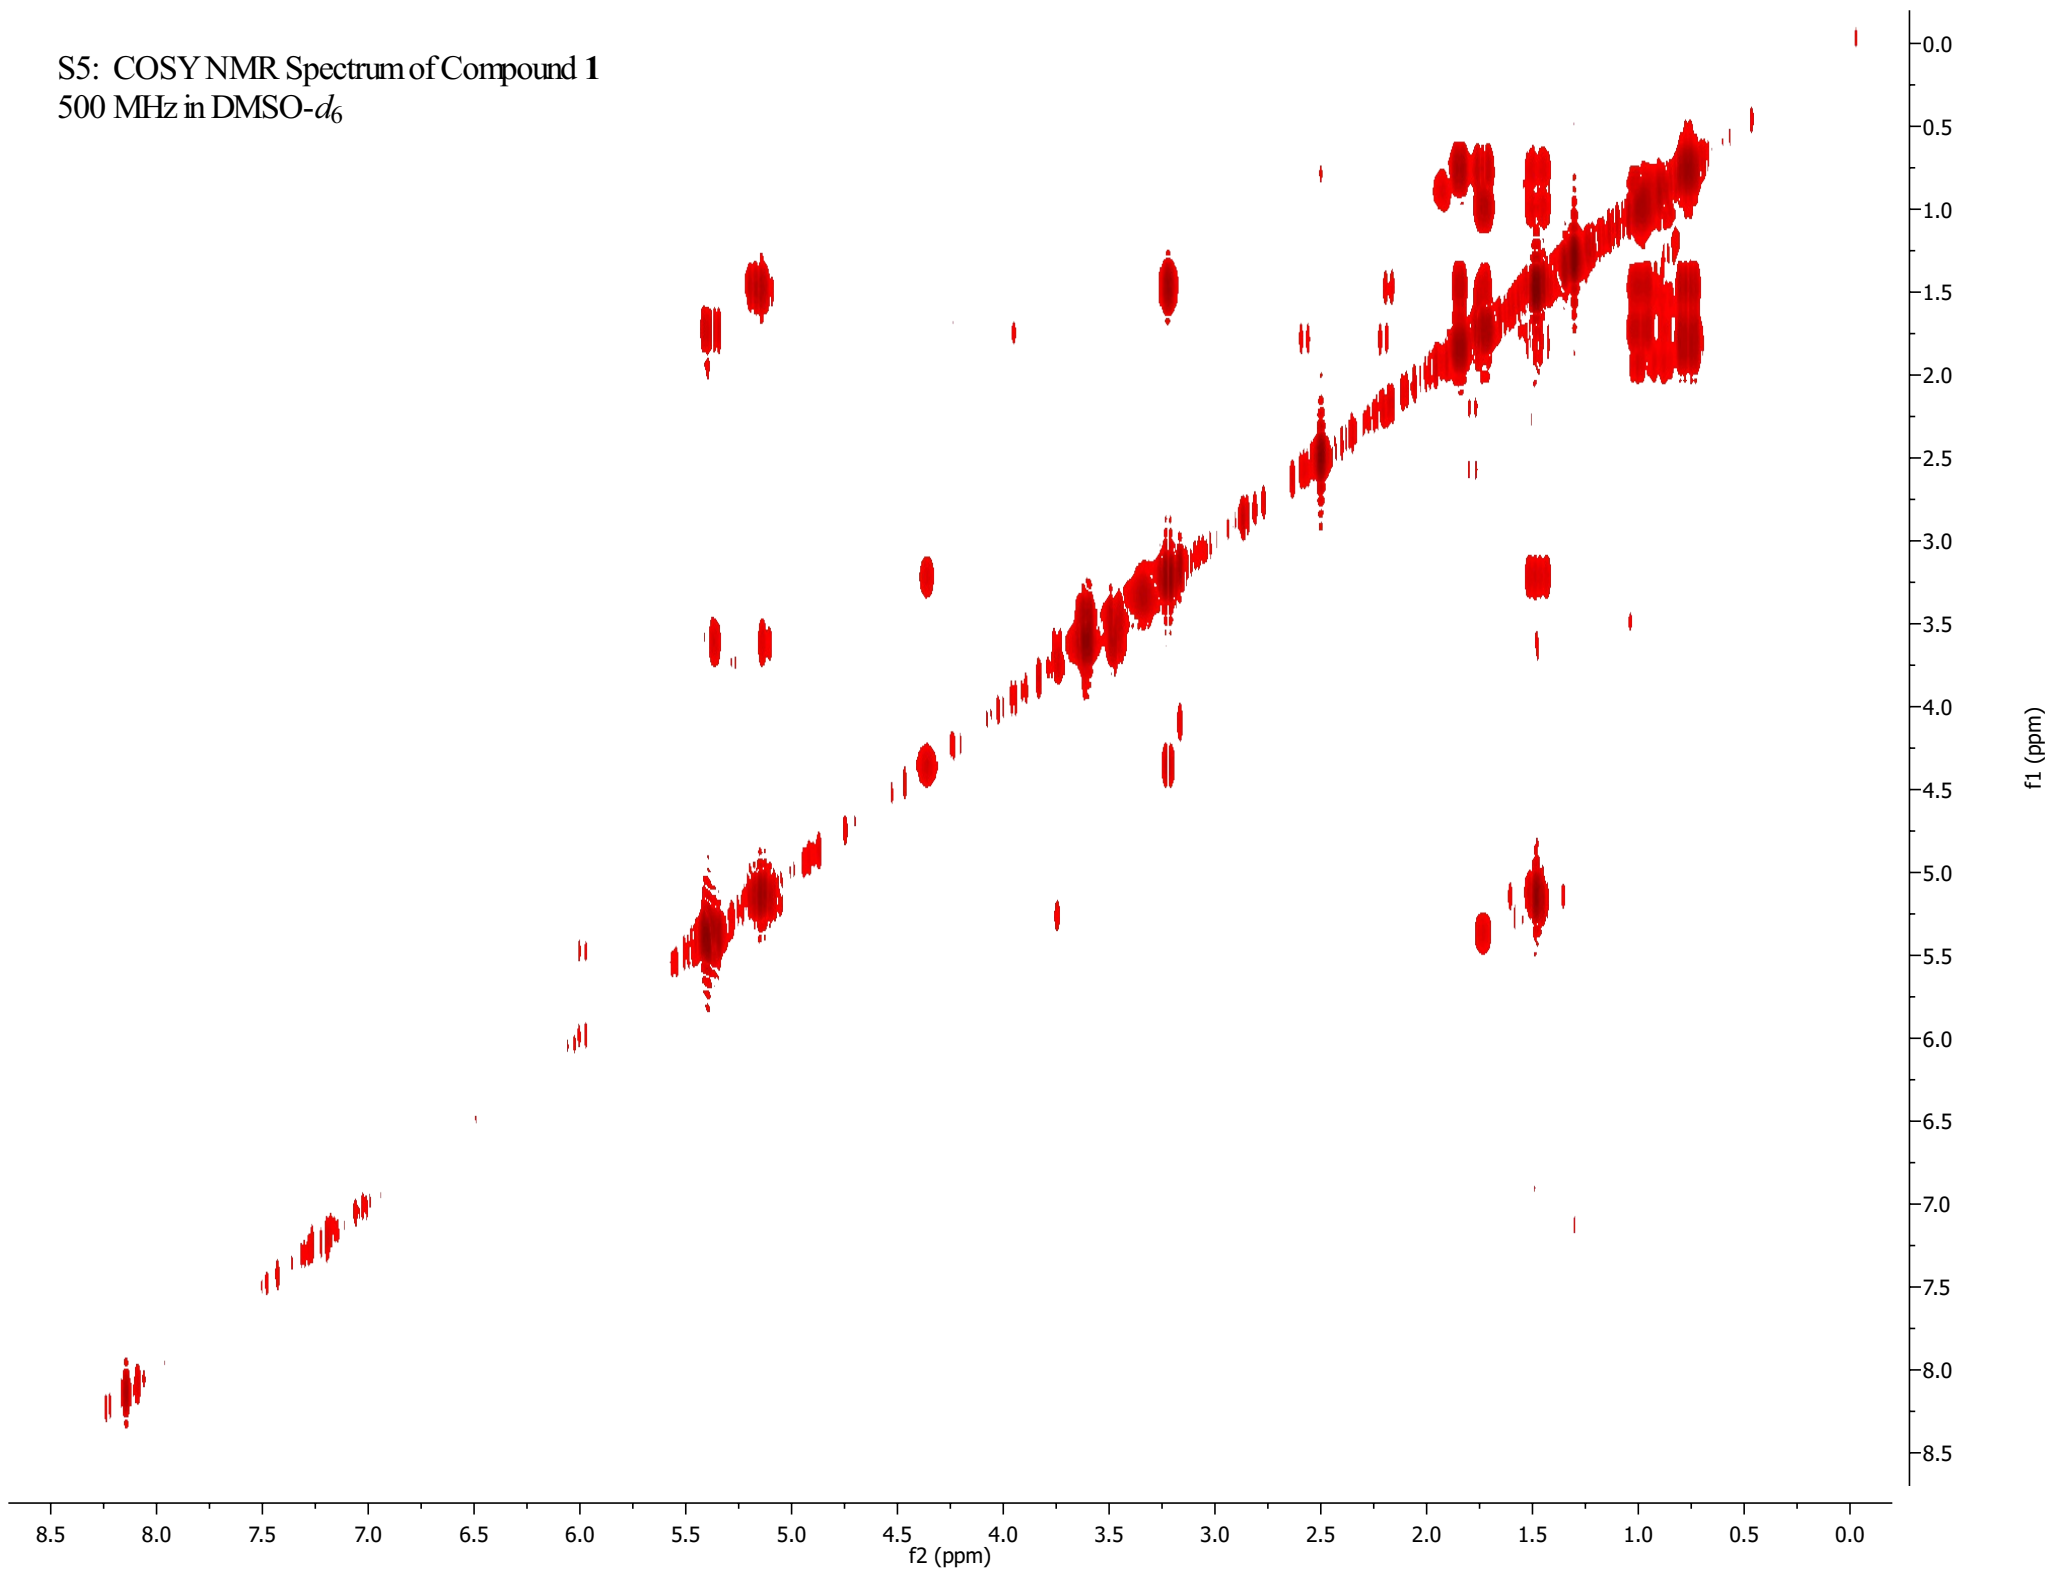

S6: HSQC NMR Spectrum of Compound **1**  
500 MHz in DMSO-*d*<sub>6</sub>

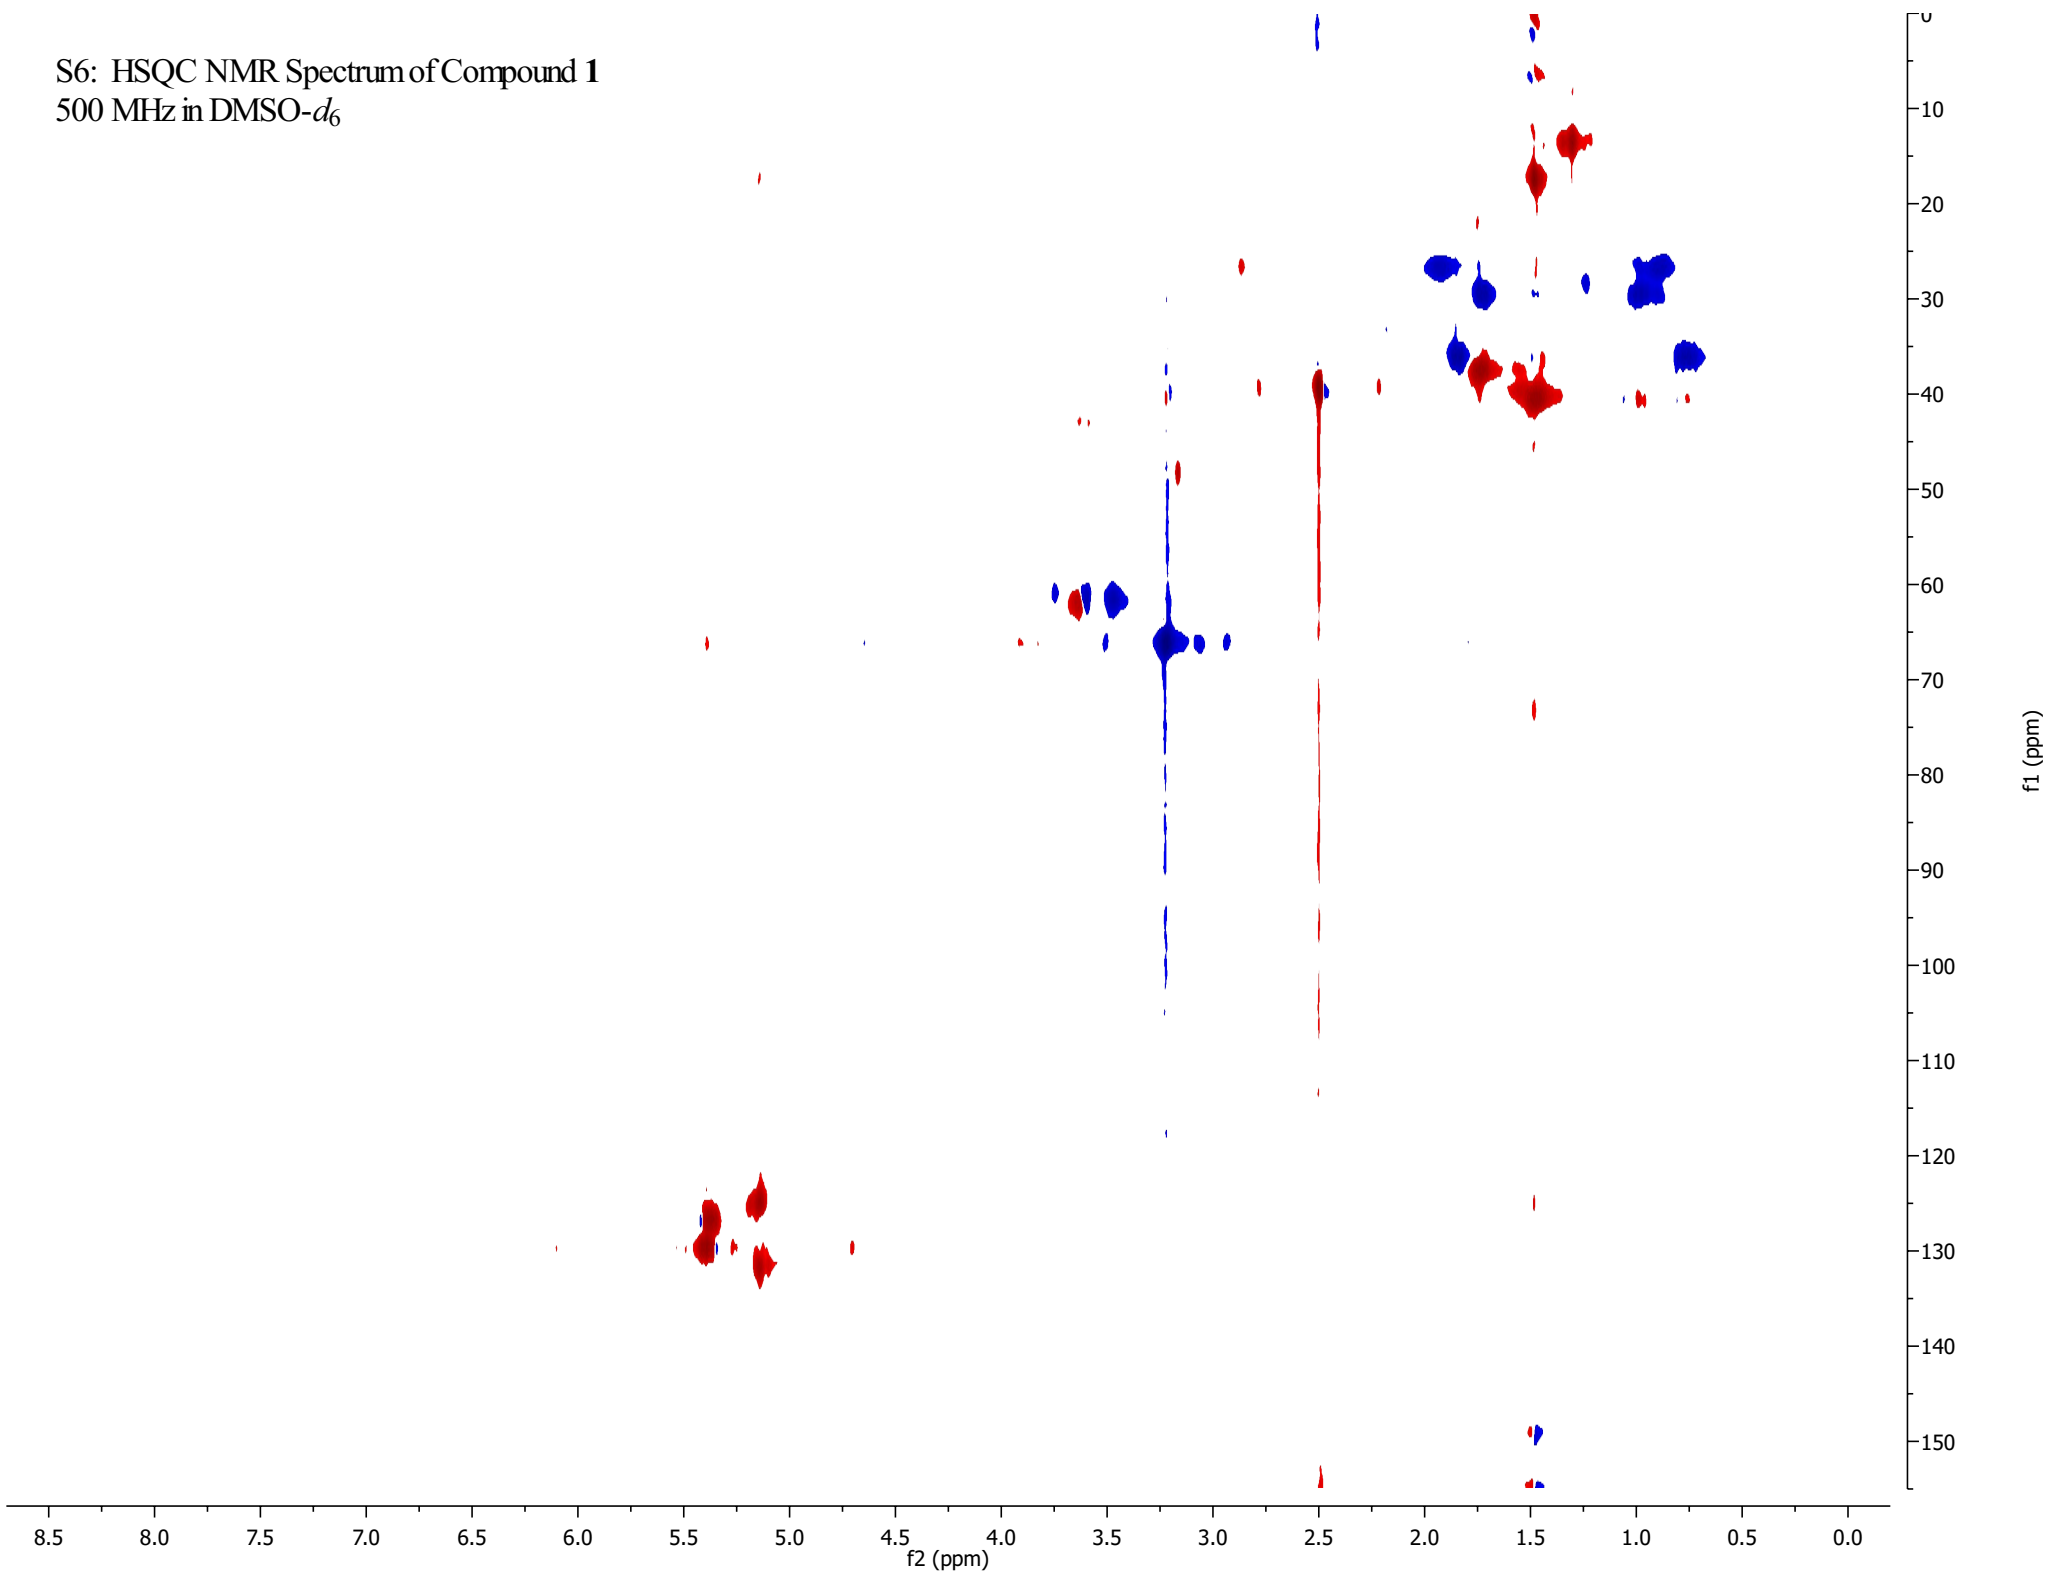

S7: HMBC NMR Spectrum of Compound 1  
500 MHz in DMSO-*d*<sub>6</sub>

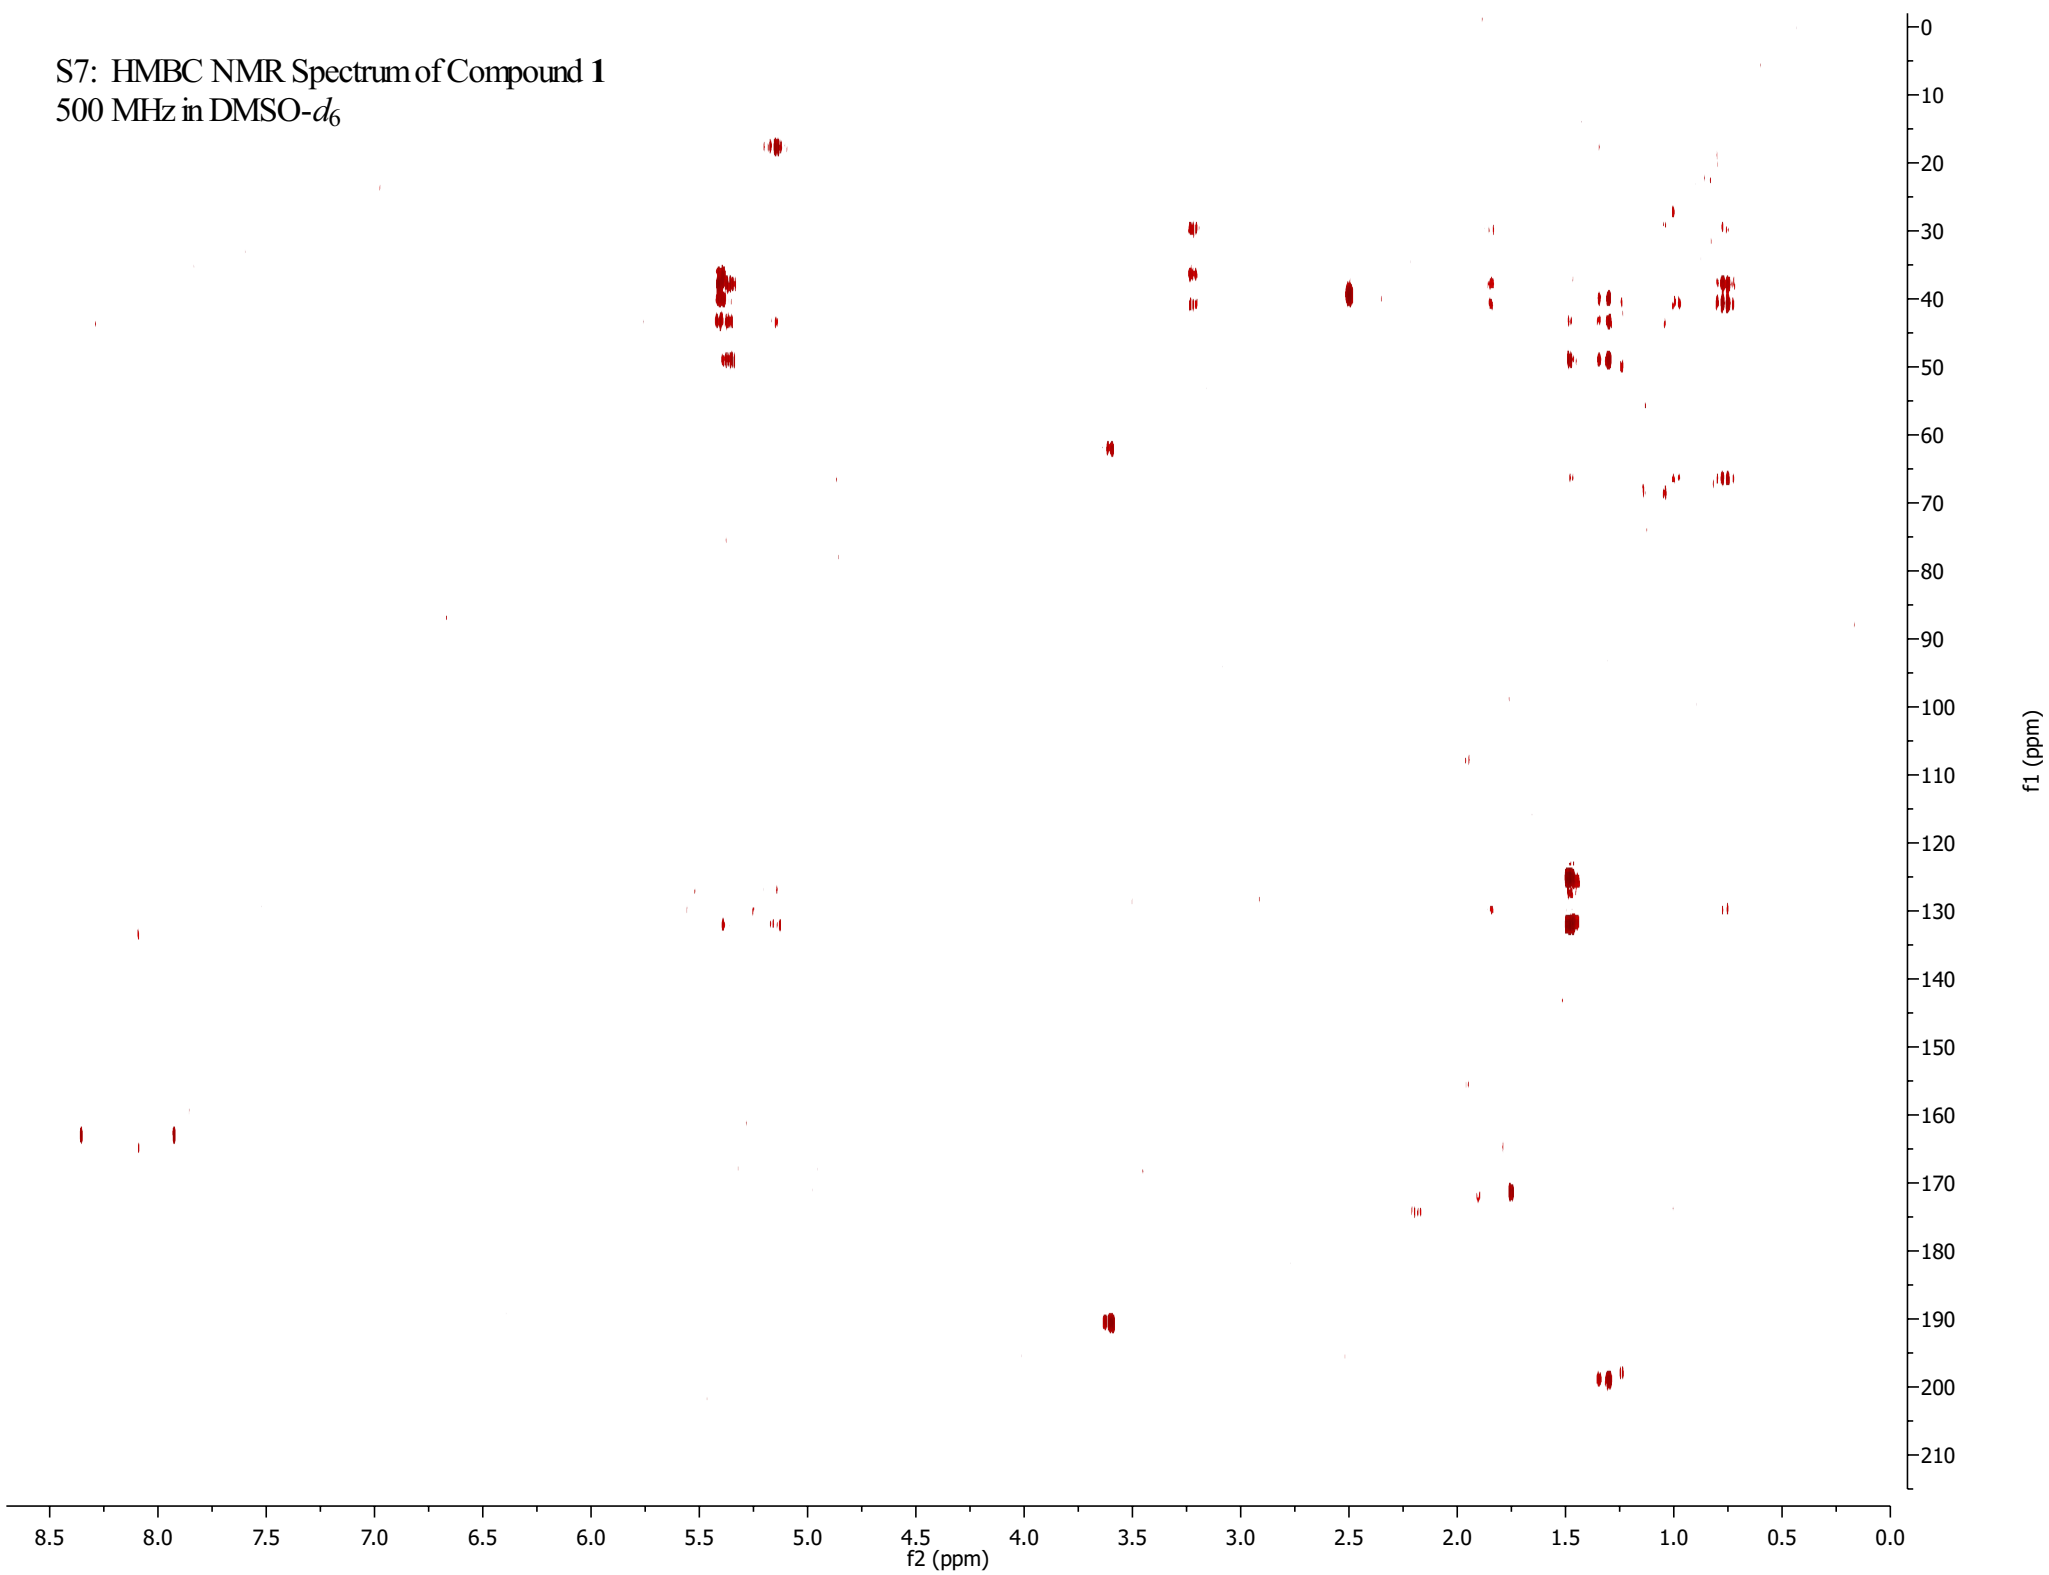

S8: NOESY NMR Spectrum of Compound **1**  
500 MHz in DMSO-*d*<sub>6</sub>

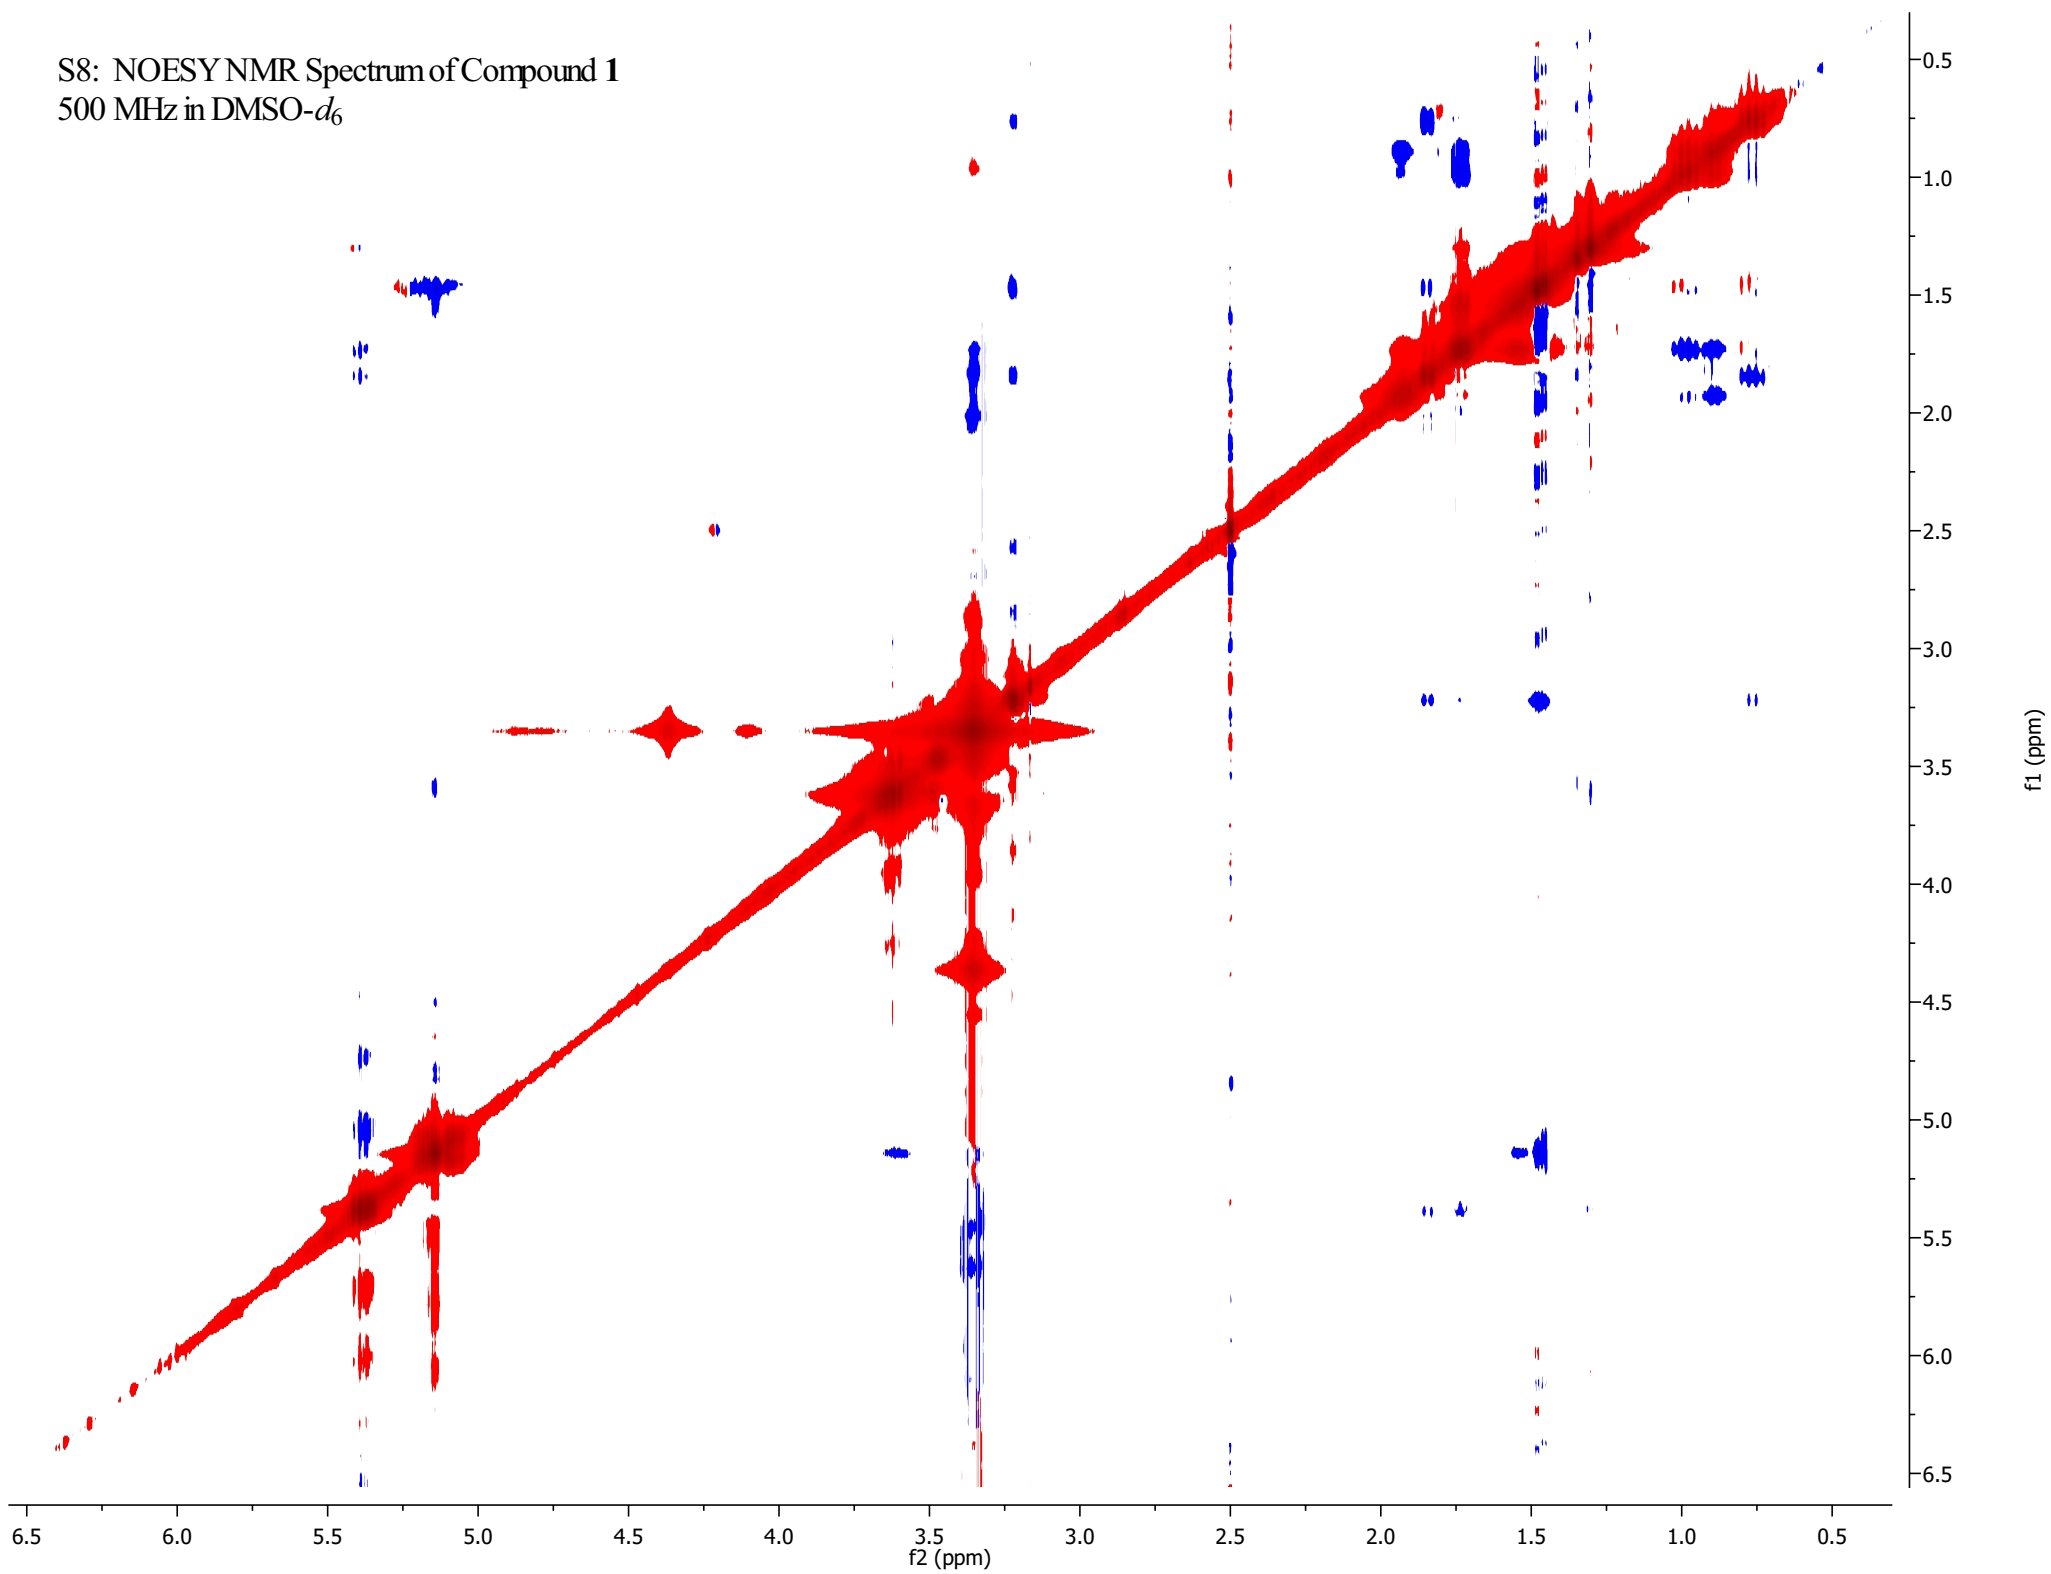



S9: TROESY NMR Spectrum of Compound **1**  
500 MHz in DMSO-*d*<sub>6</sub>

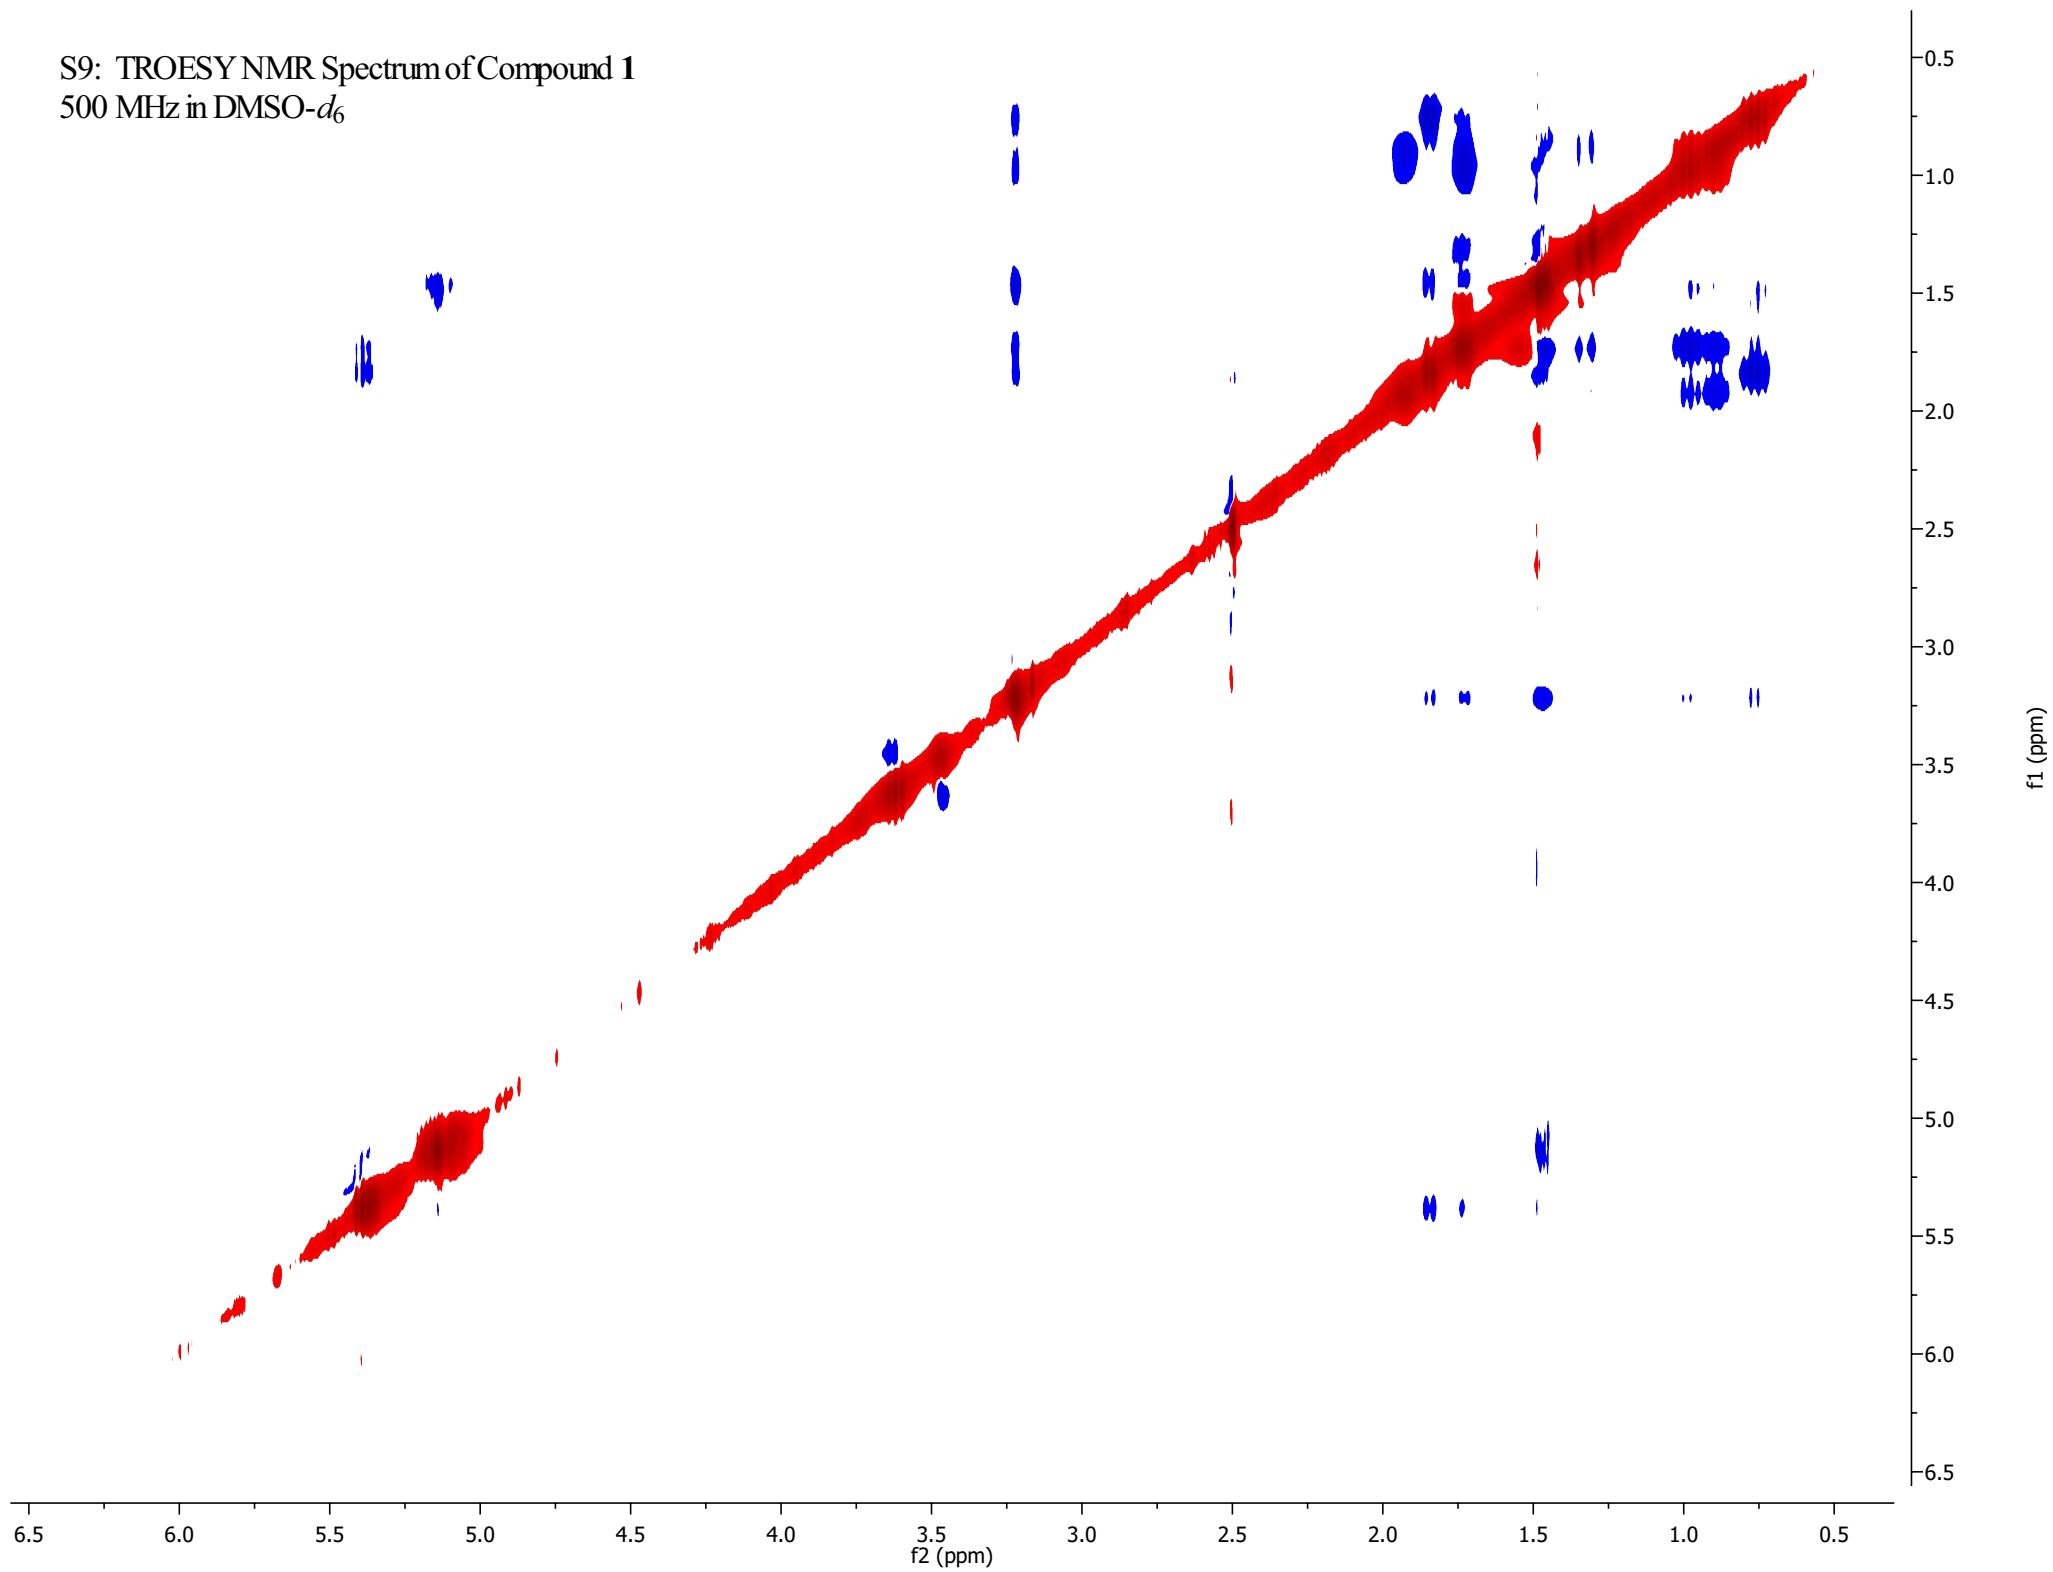

S10:  $^1\text{H}$  NMR Spectrum of Compound **2**  
500 MHz in  $\text{DMSO-}d_6$

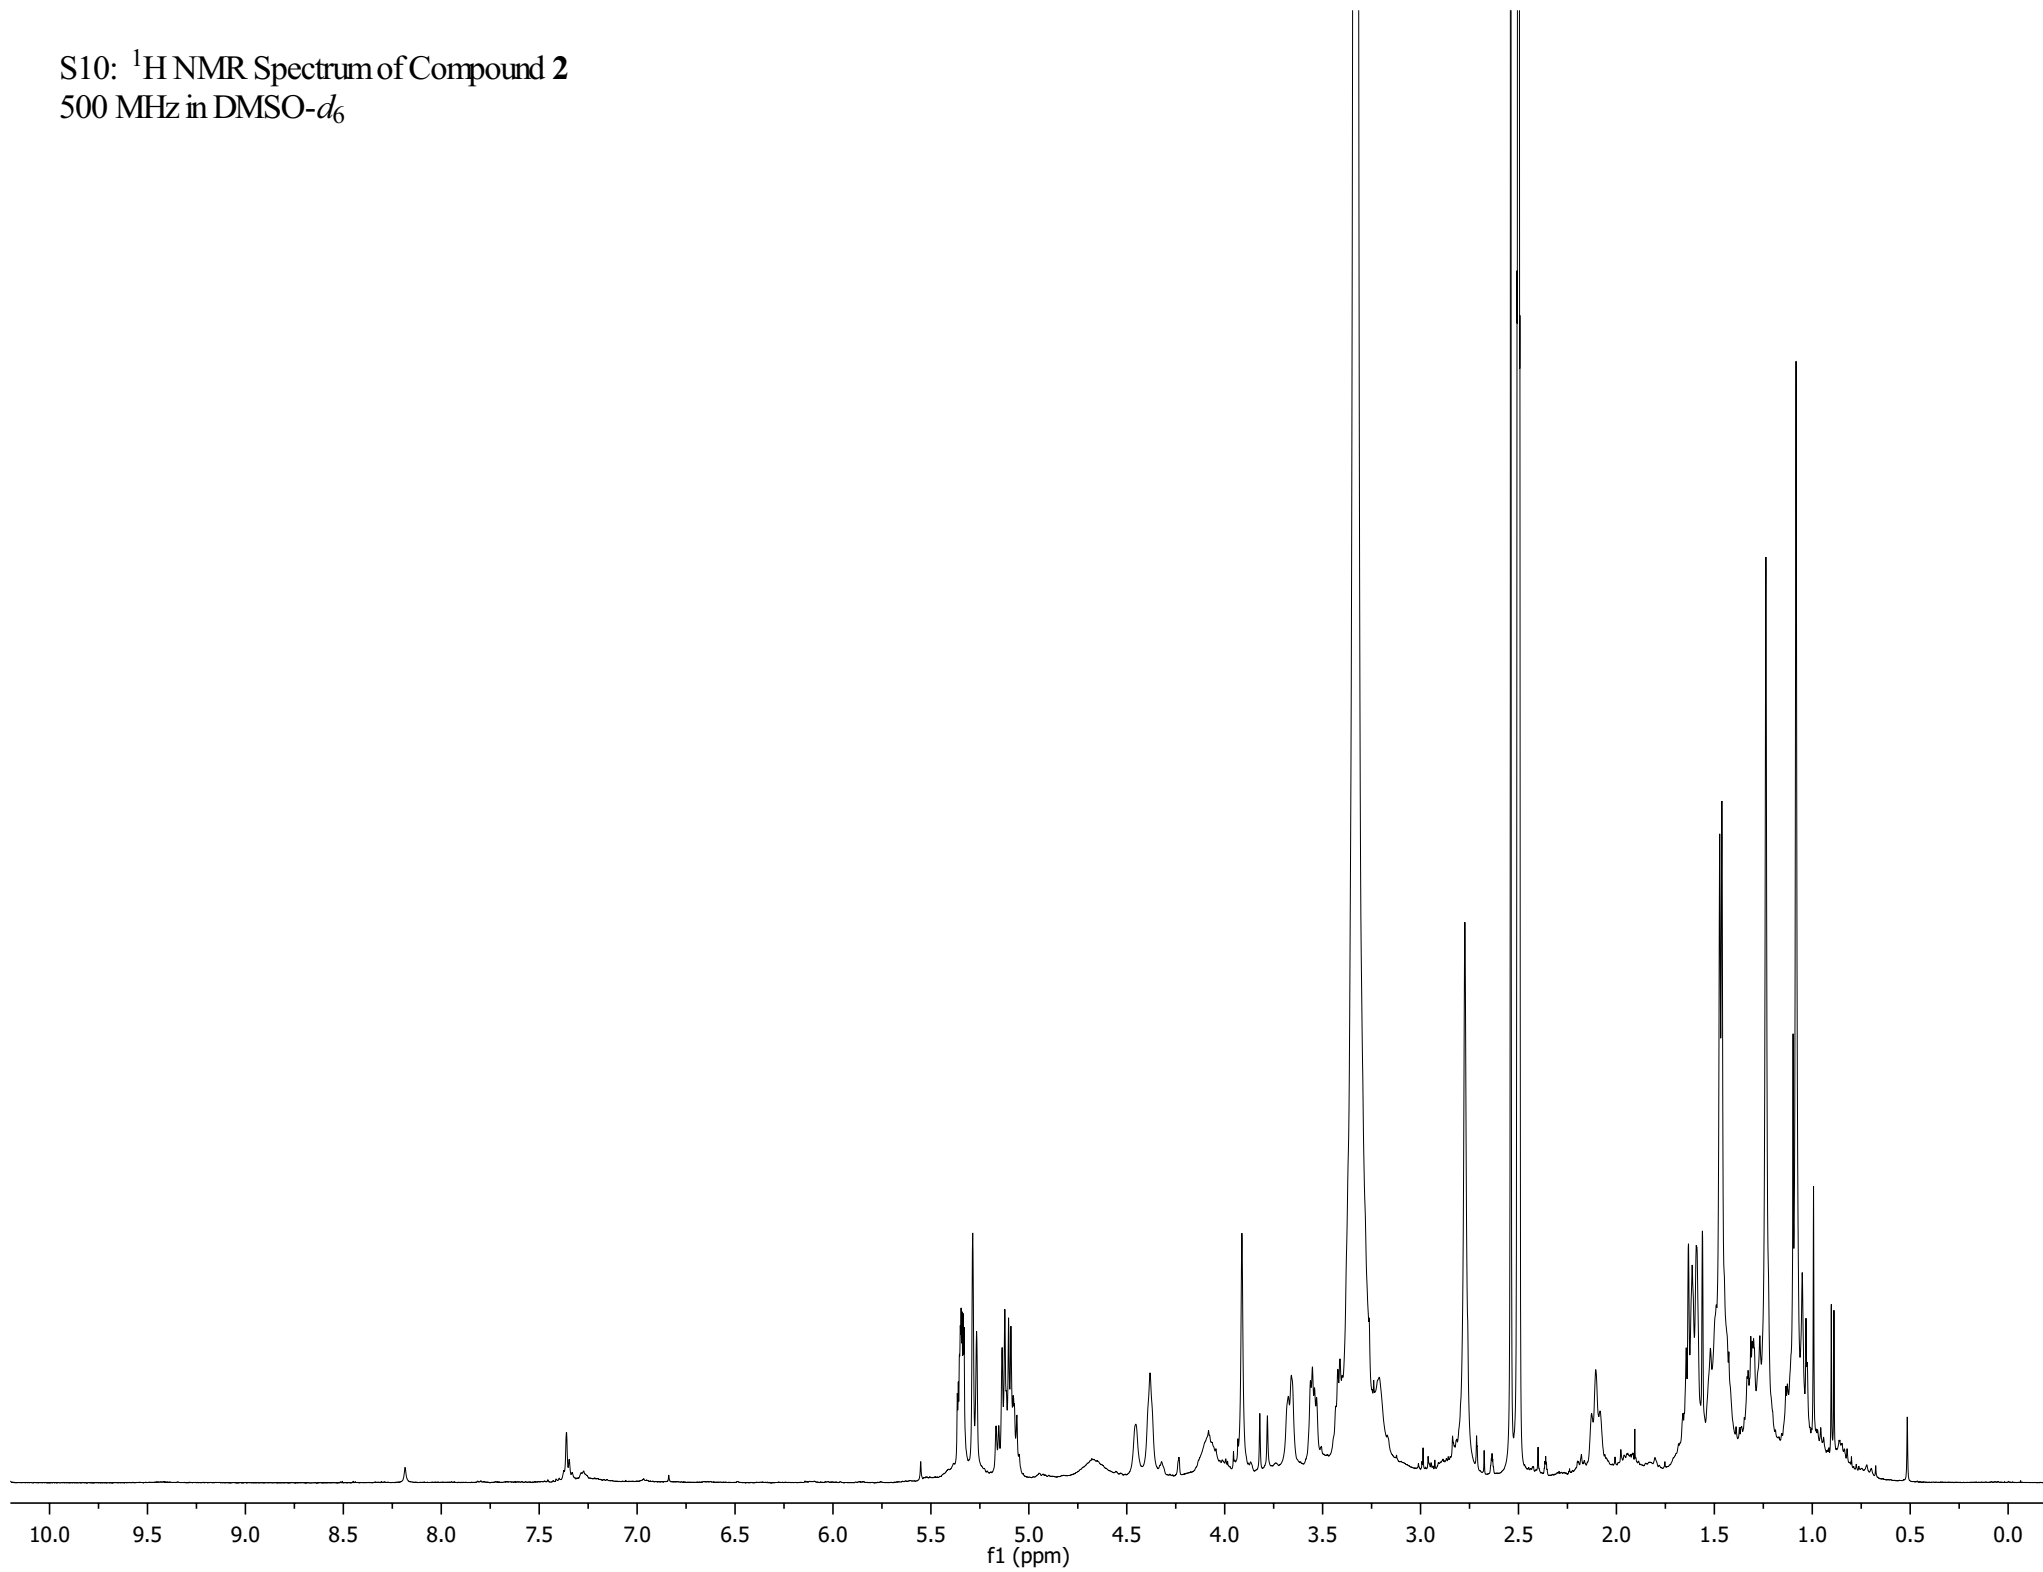

S11:  $^{13}\text{C}$  NMR Spectrum of Compound **2**  
150 MHz in  $\text{DMSO-}d_6$

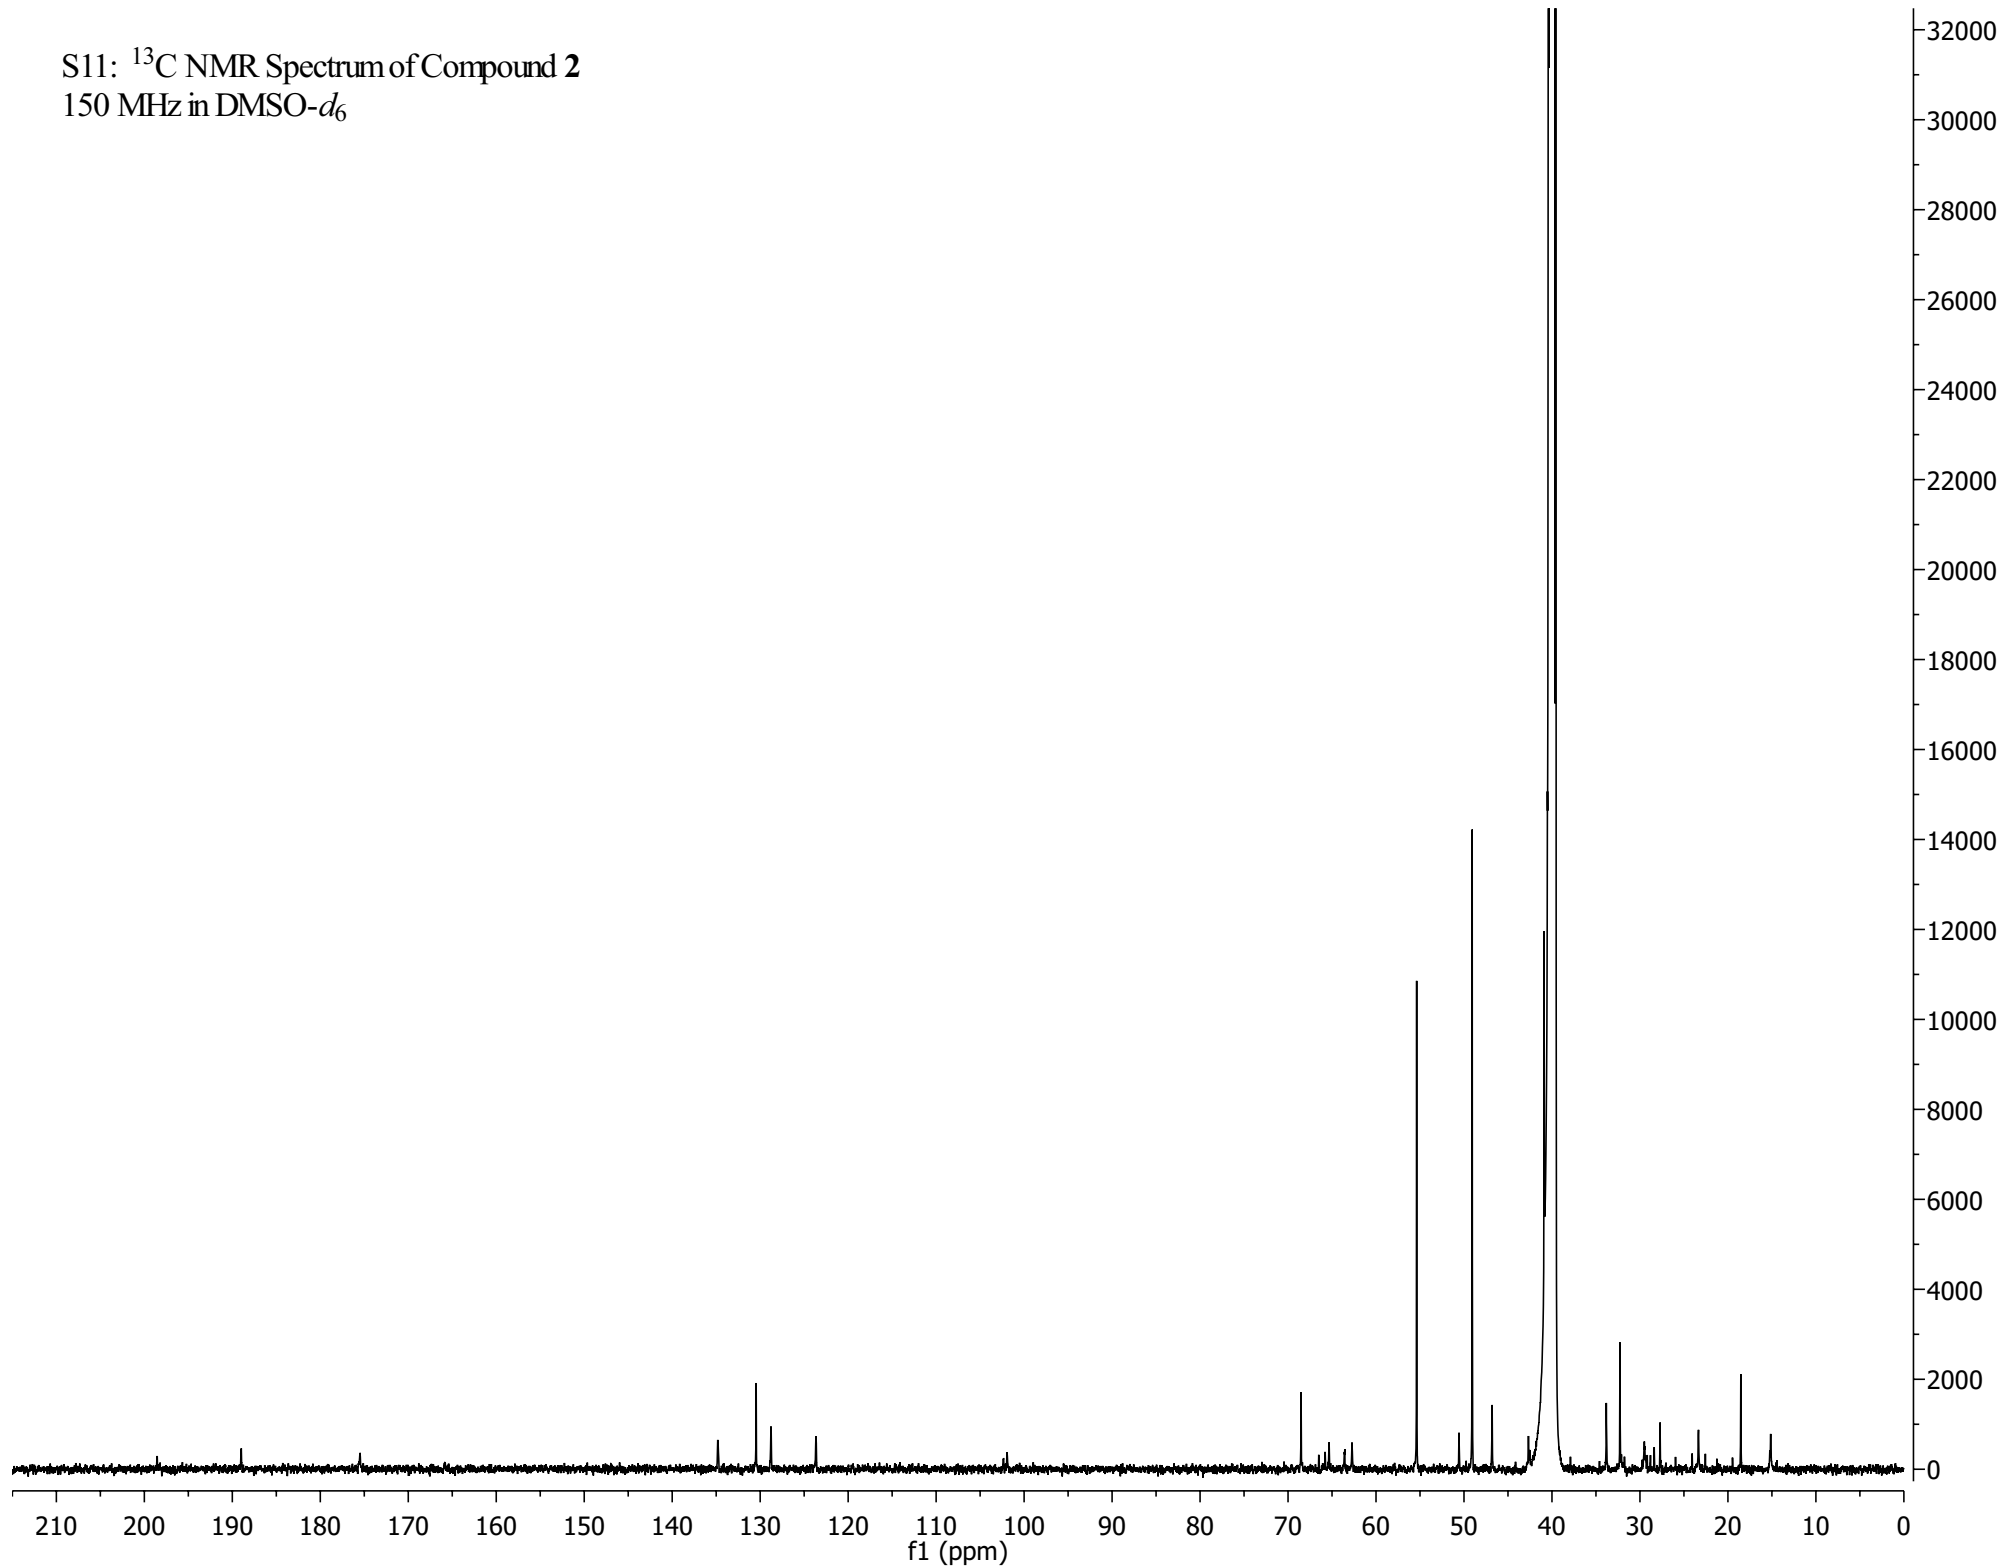

S12: COSY NMR Spectrum of Compound 2  
500 MHz in DMSO- $d_6$

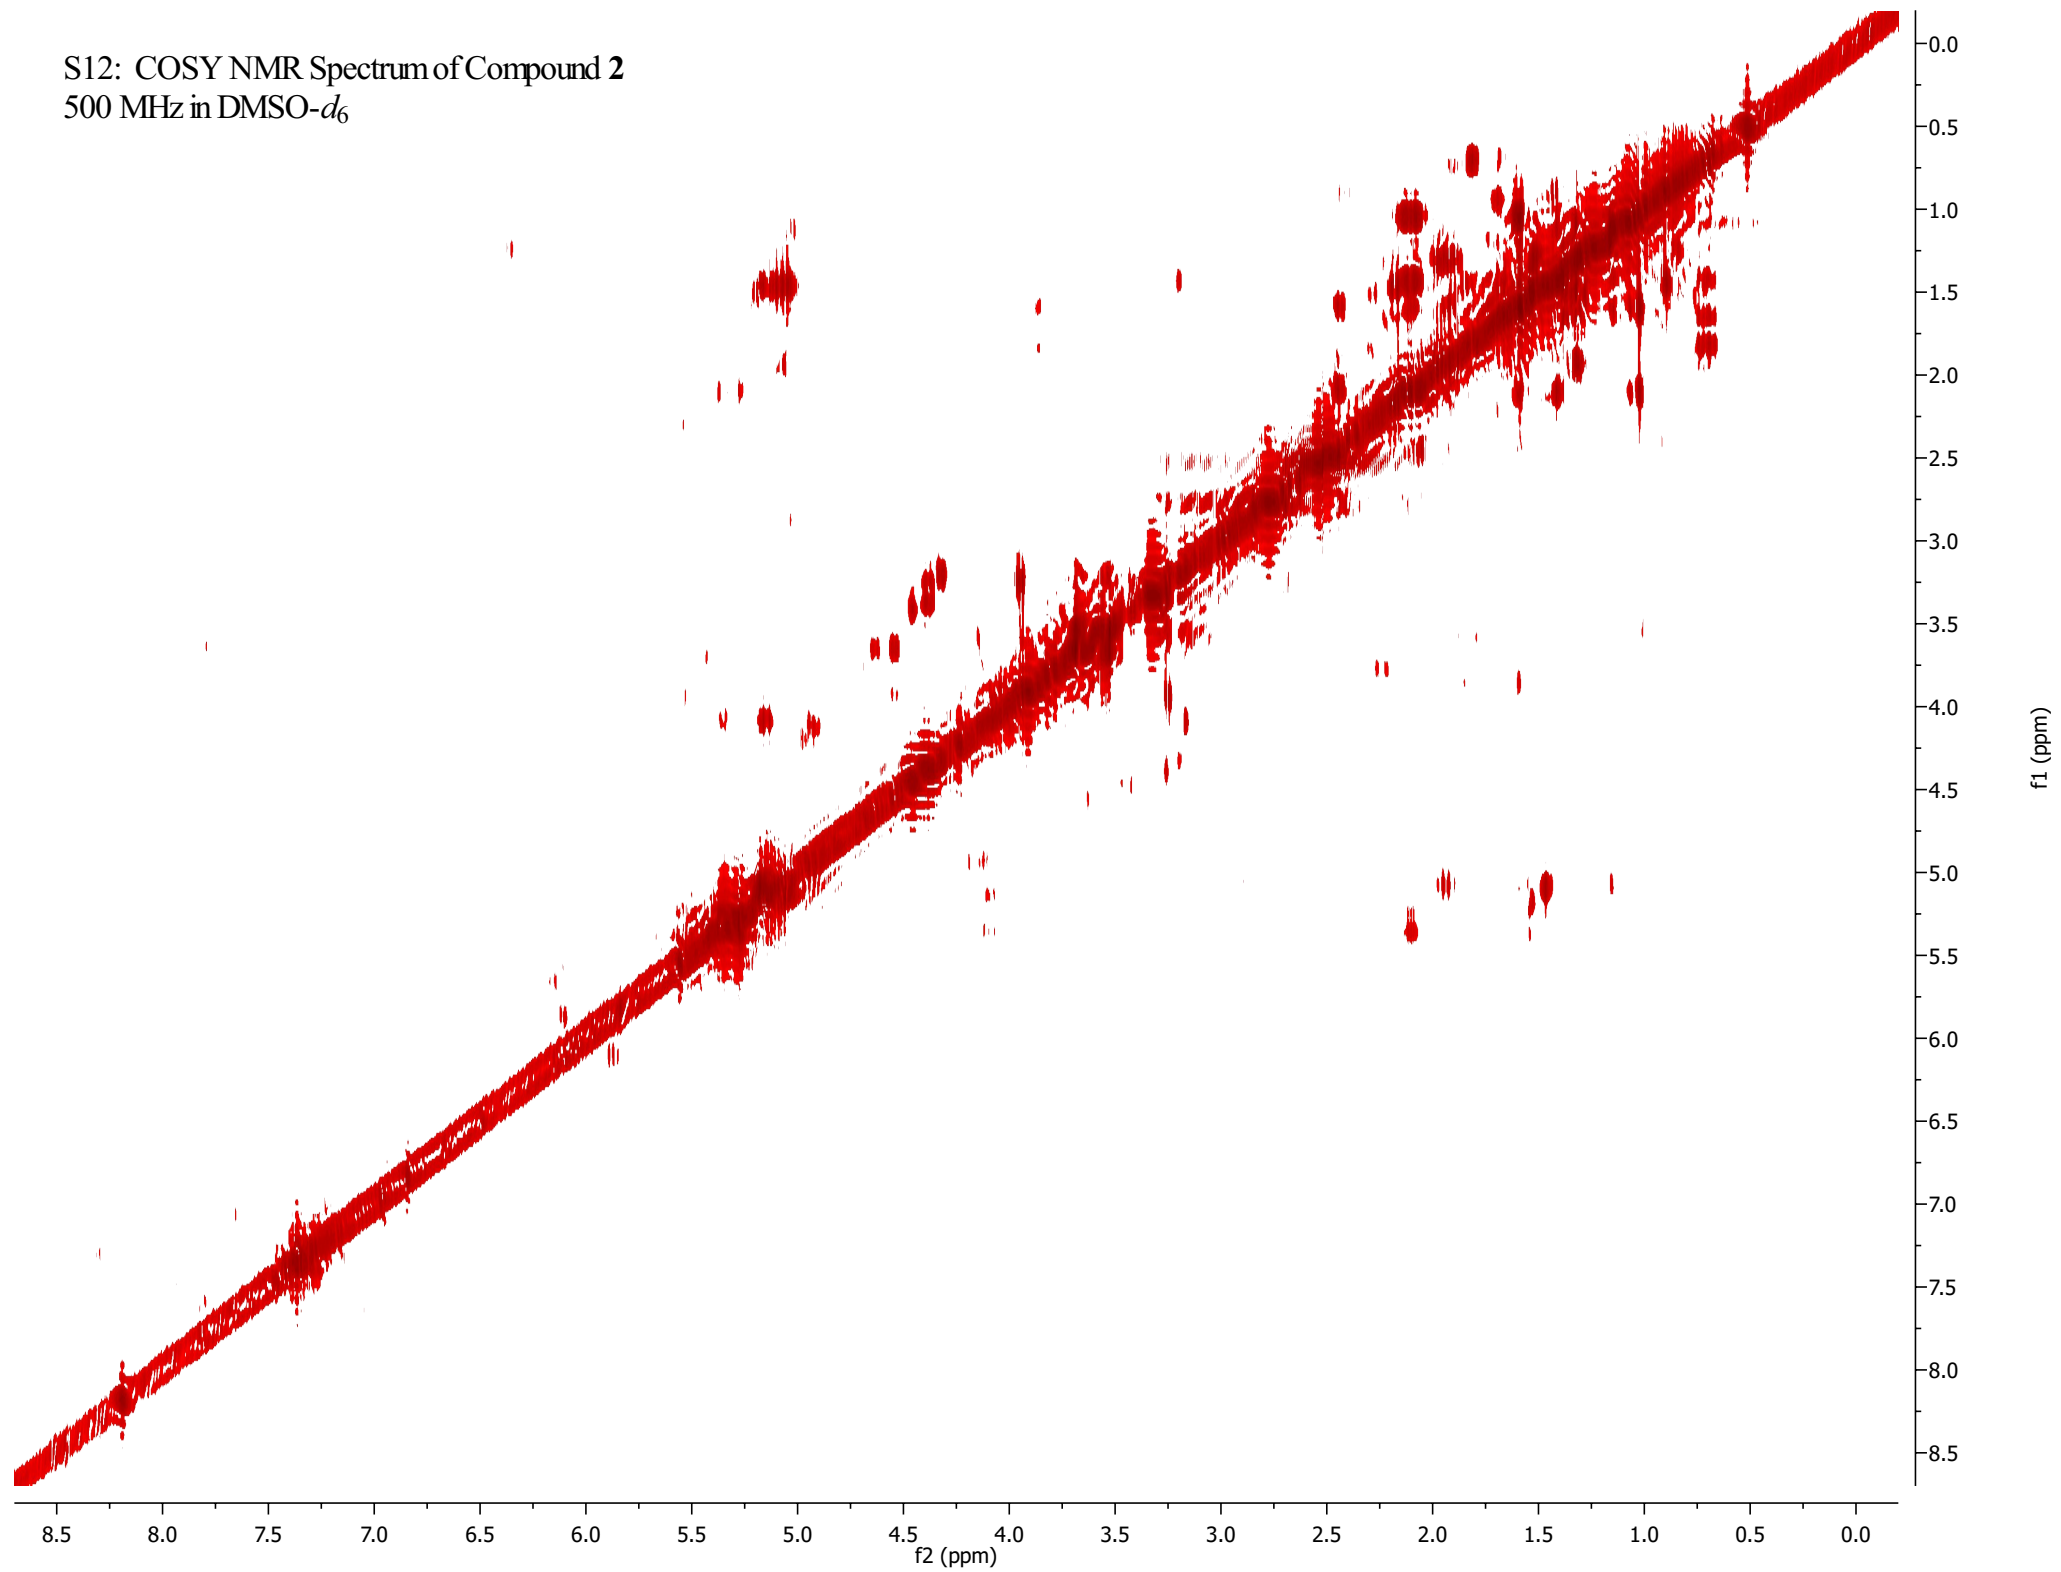

S13: HSQC NMR Spectrum of Compound 2  
500 MHz in DMSO-*d*<sub>6</sub>

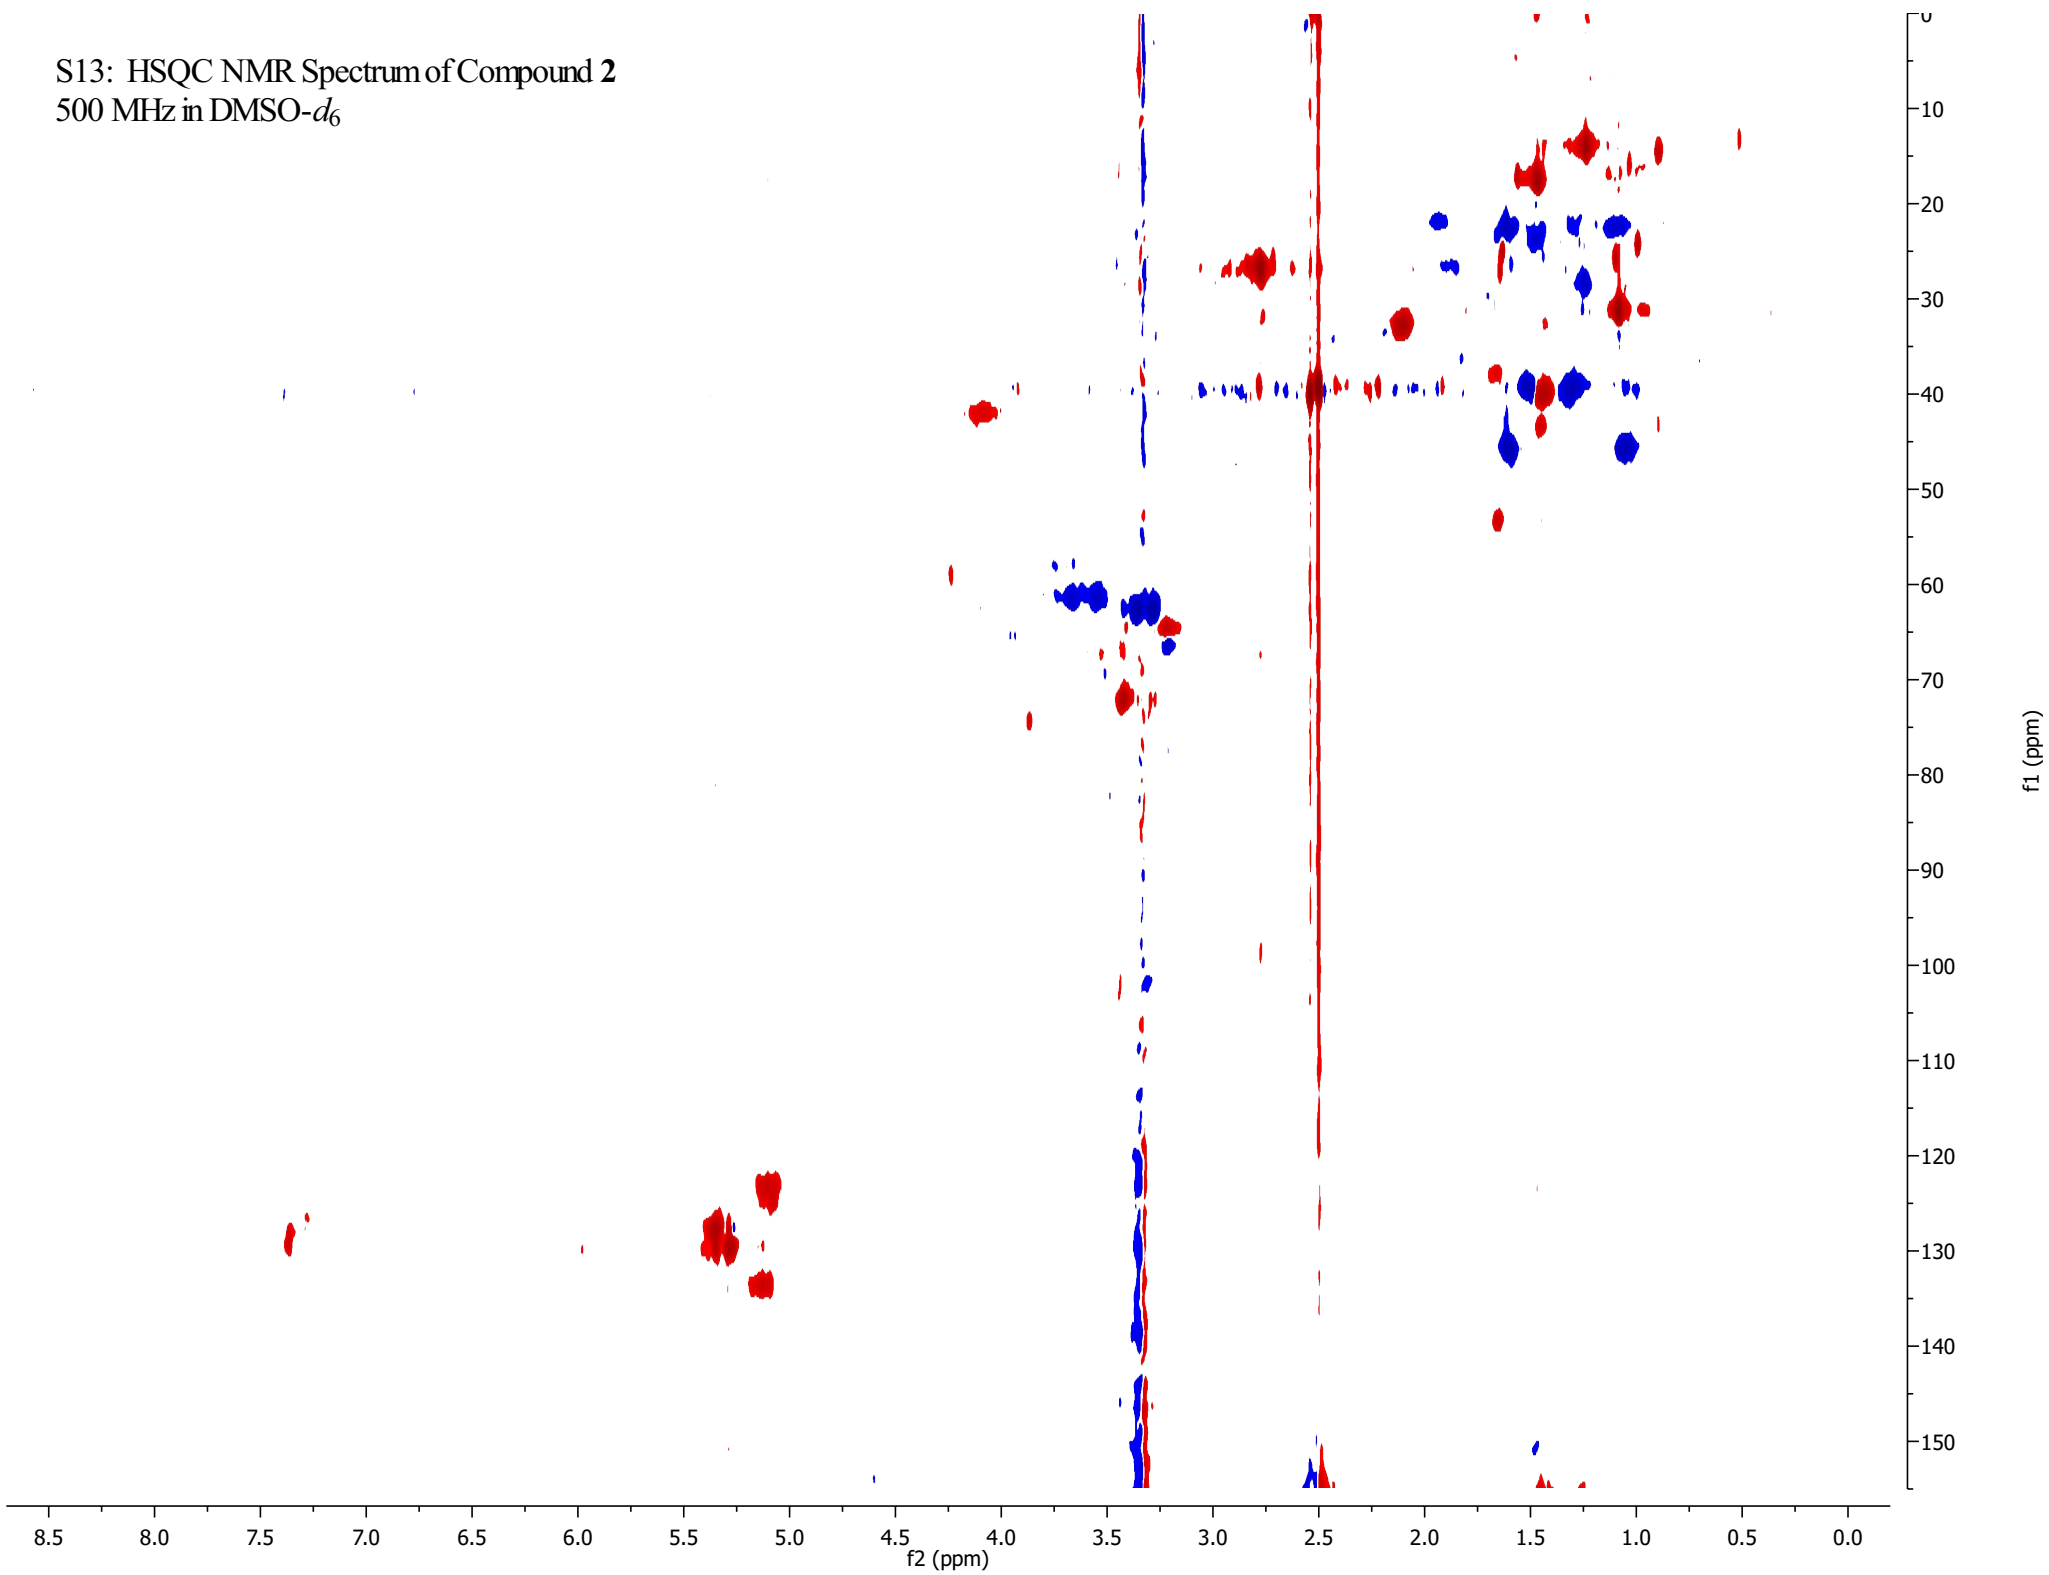

S14: HMBC NMR Spectrum of Compound 2  
500 MHz in DMSO-*d*<sub>6</sub>

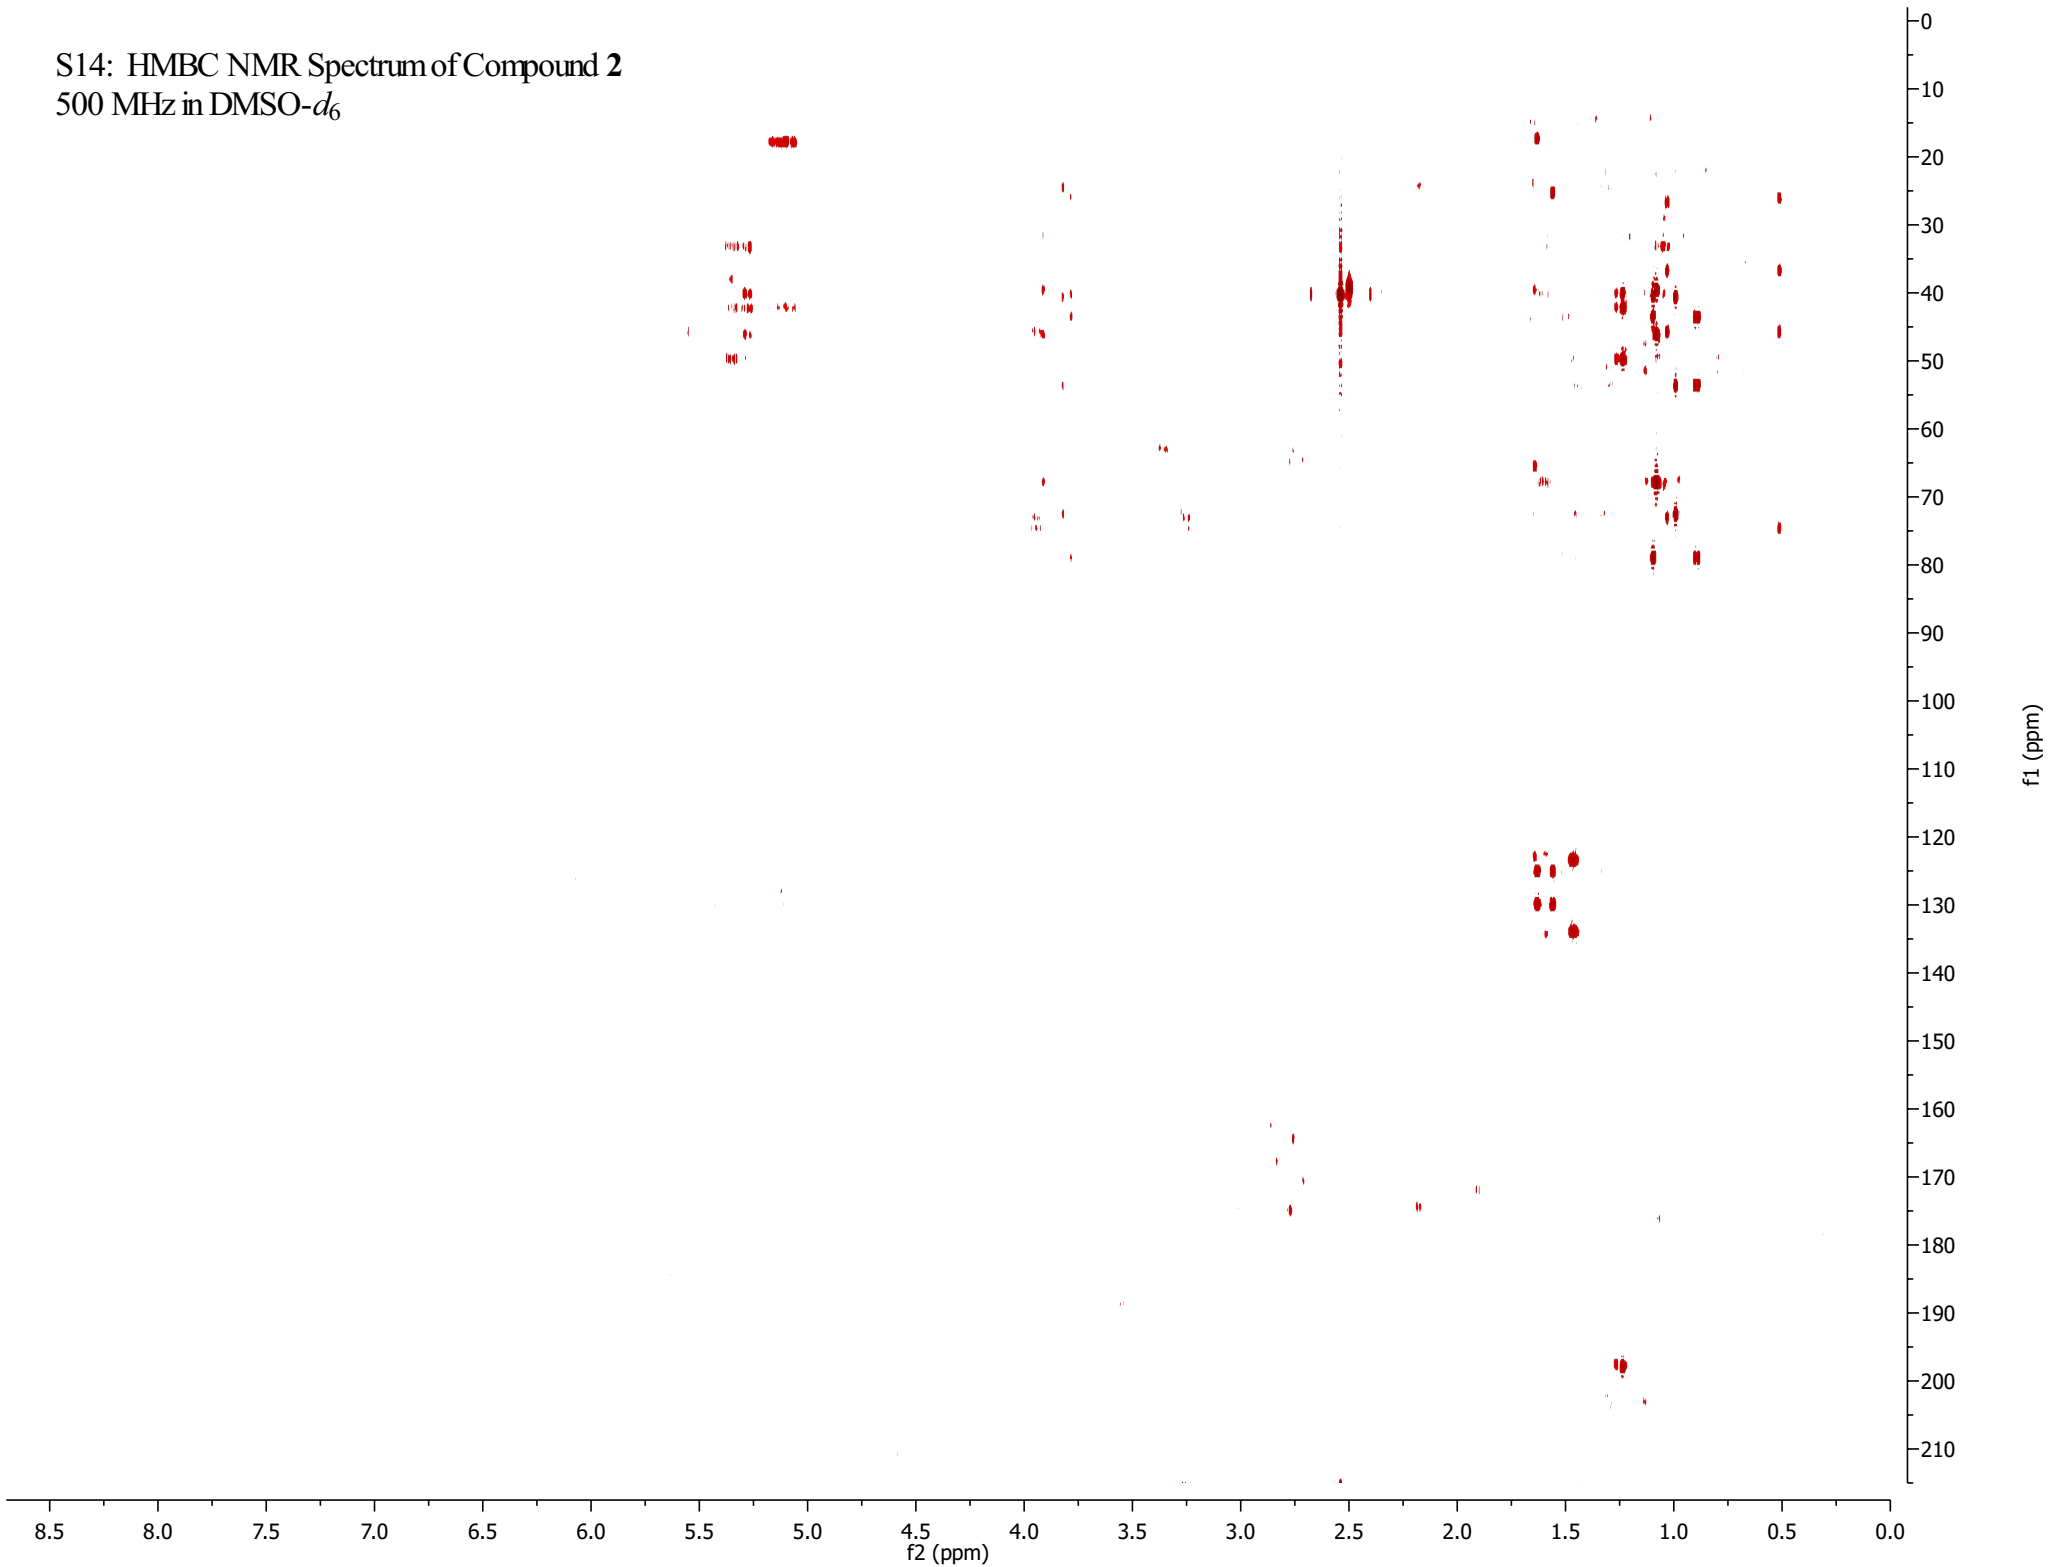

S15: NOESY NMR Spectrum of Compound 2  
500 MHz in DMSO- $d_6$

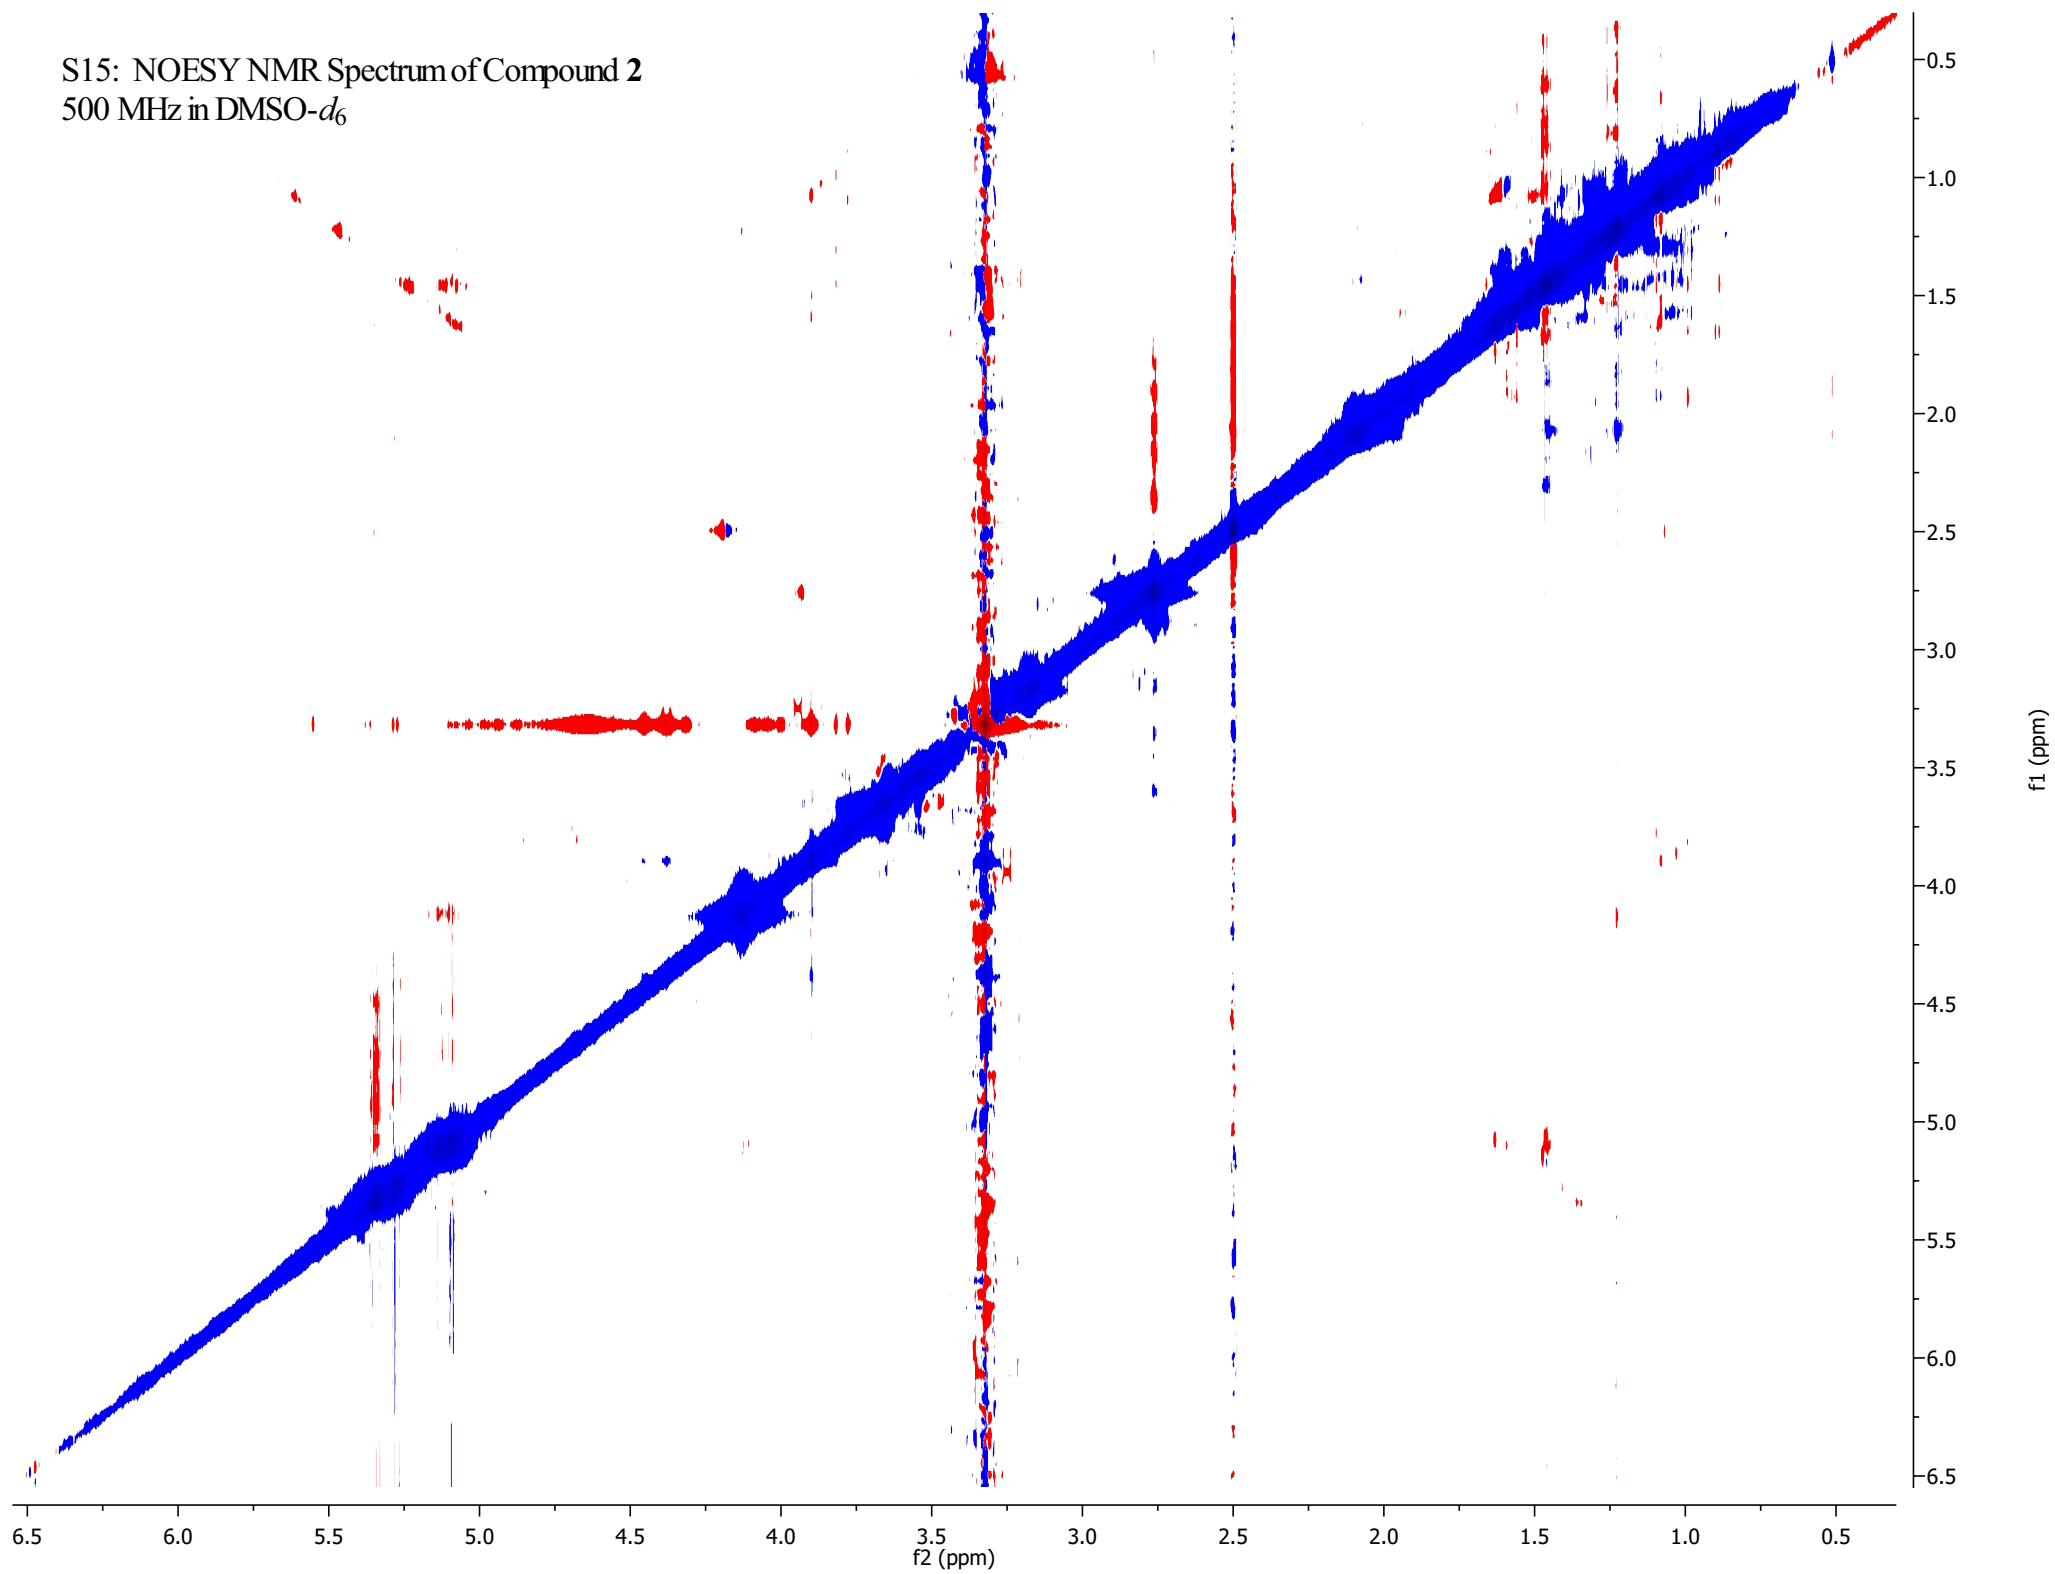

S16: TROESY NMR Spectrum of Compound 2  
500 MHz in DMSO- $d_6$

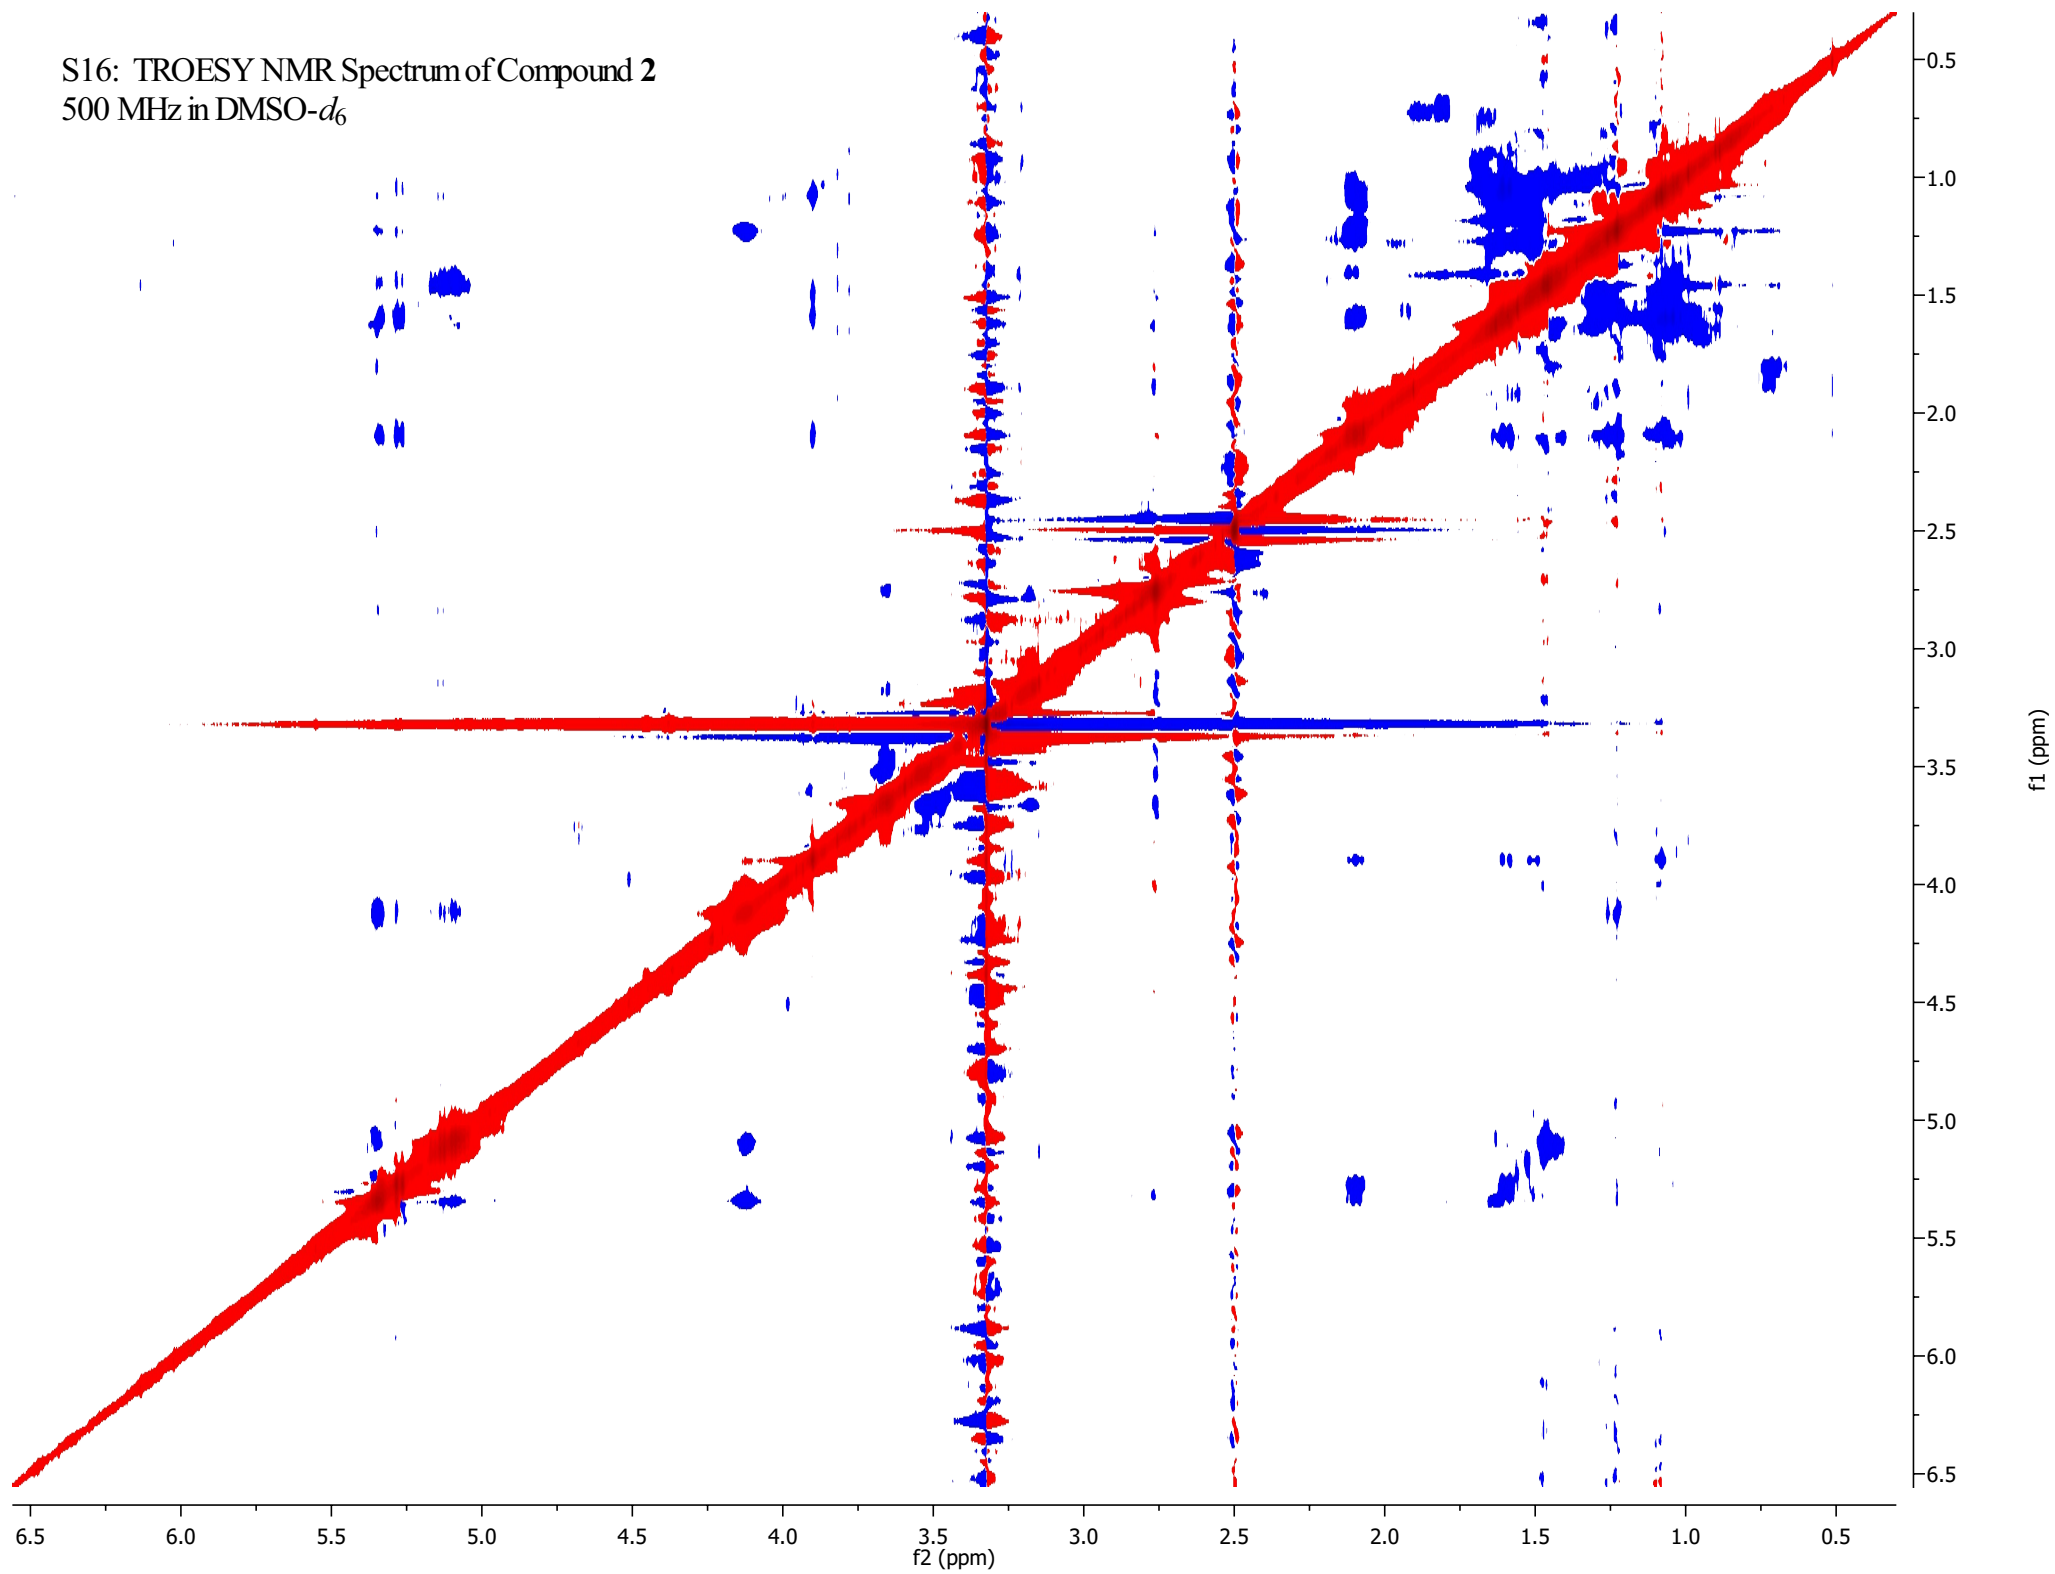



S17:  $^1\text{H}$  NMR Spectrum of Compound **3**  
500 MHz in  $\text{DMSO-}d_6$

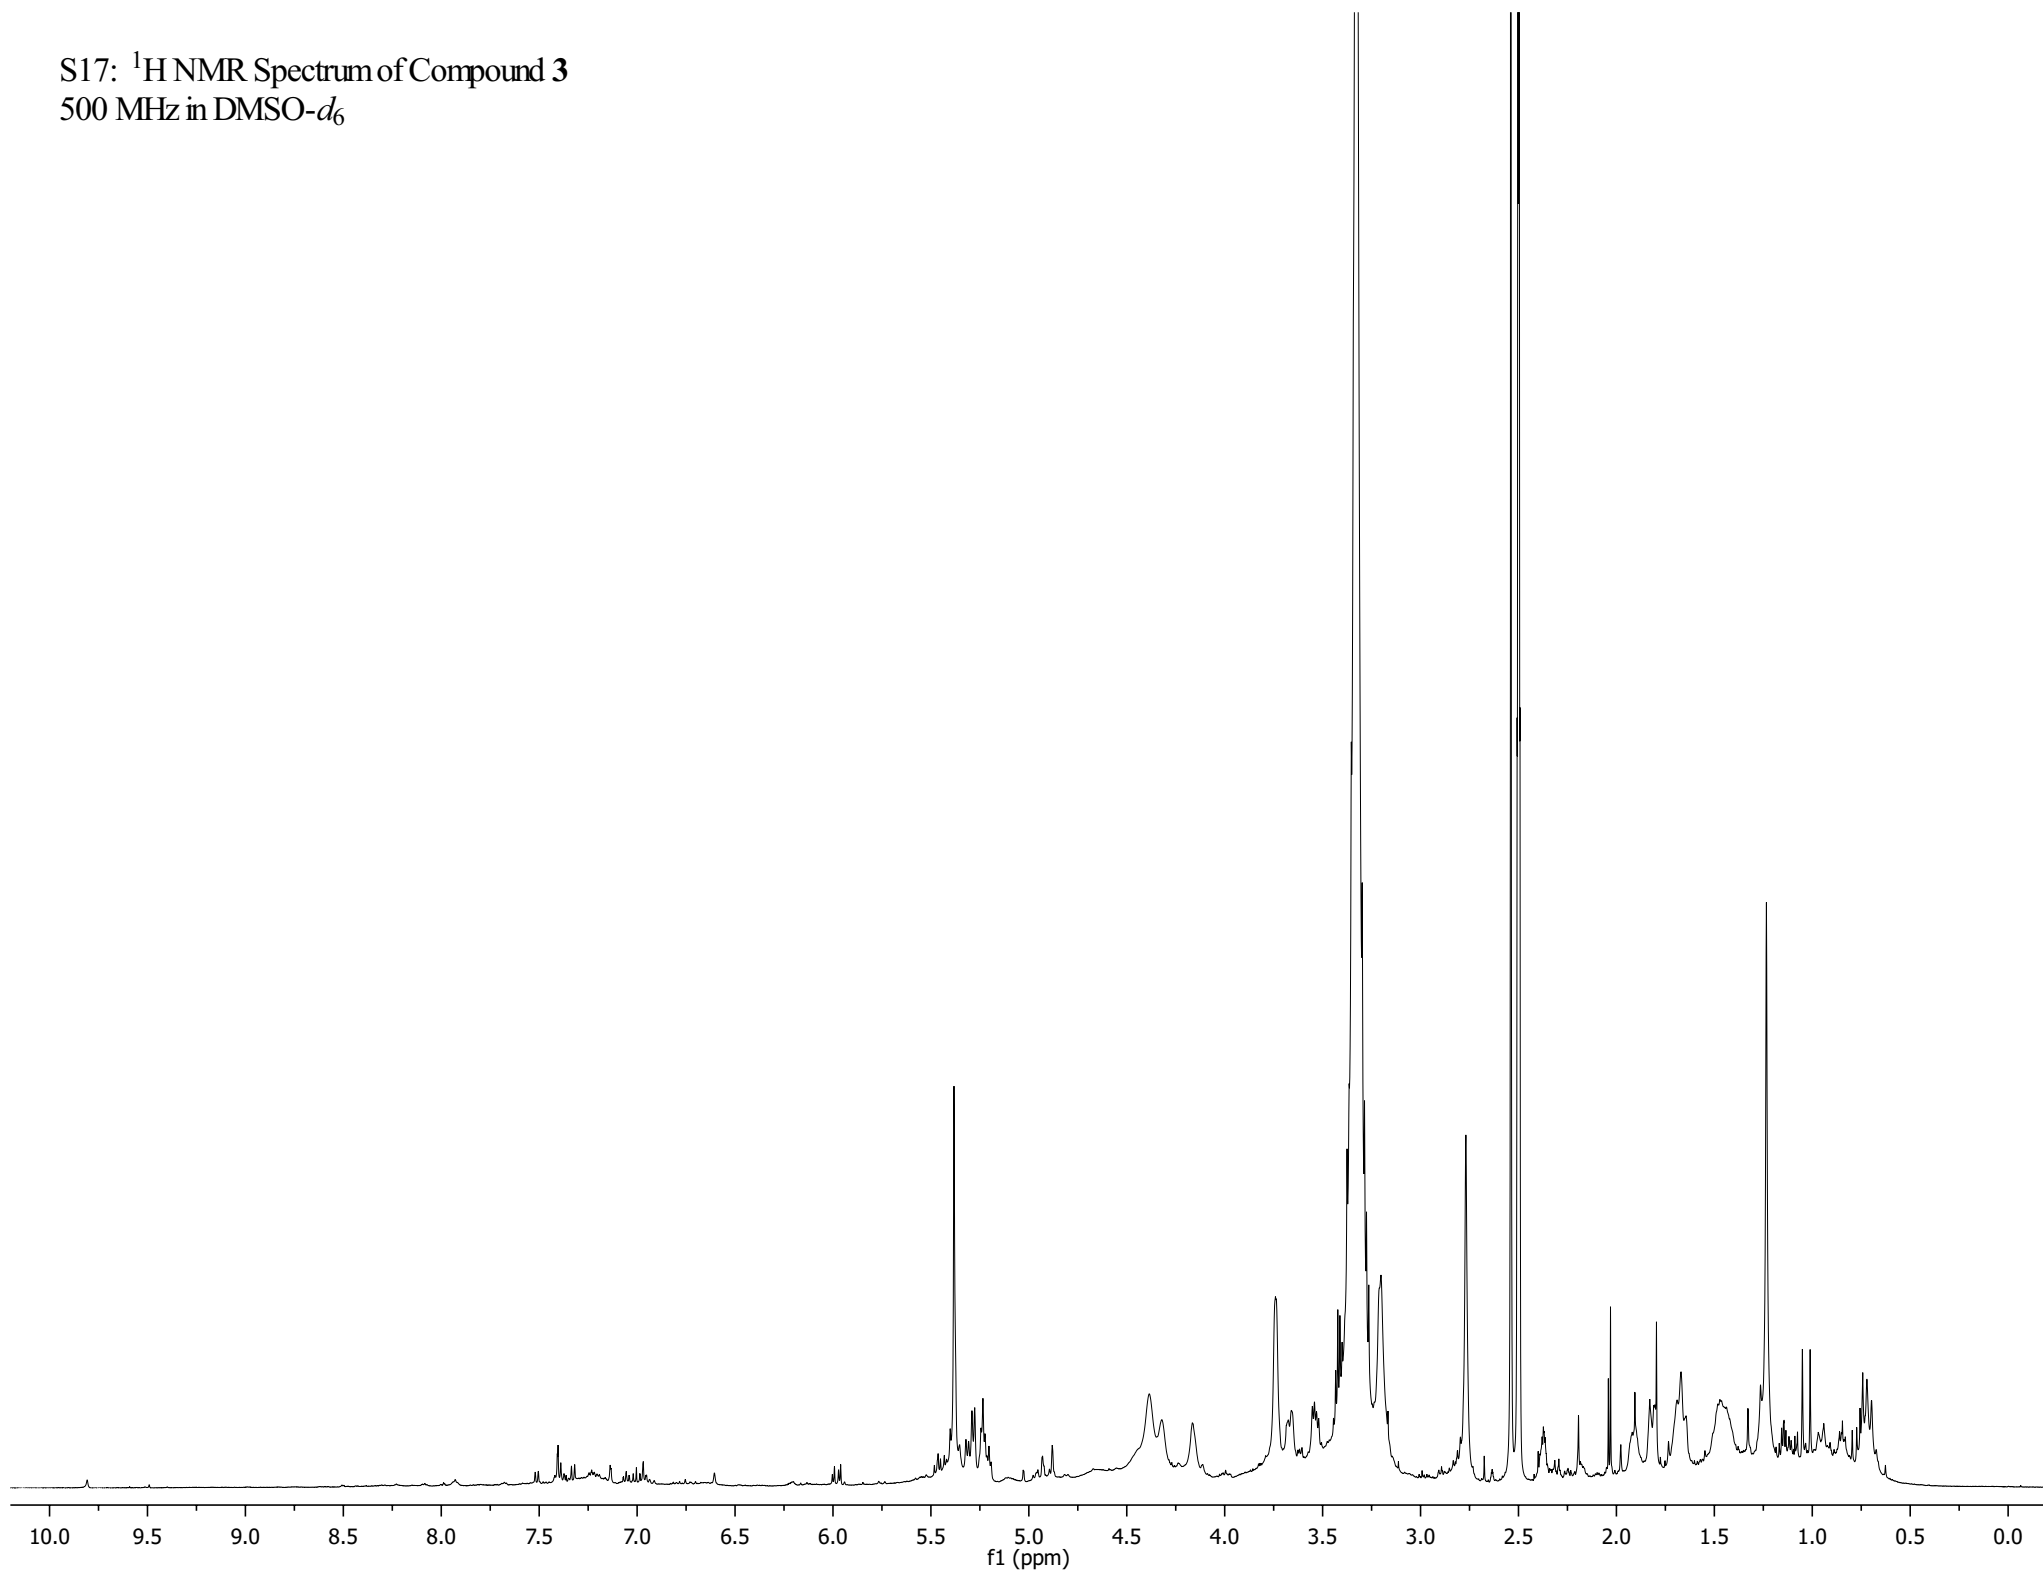

S18:  $^{13}\text{C}$  NMR Spectrum of Compound **3**  
150 MHz in  $\text{DMSO-}d_6$

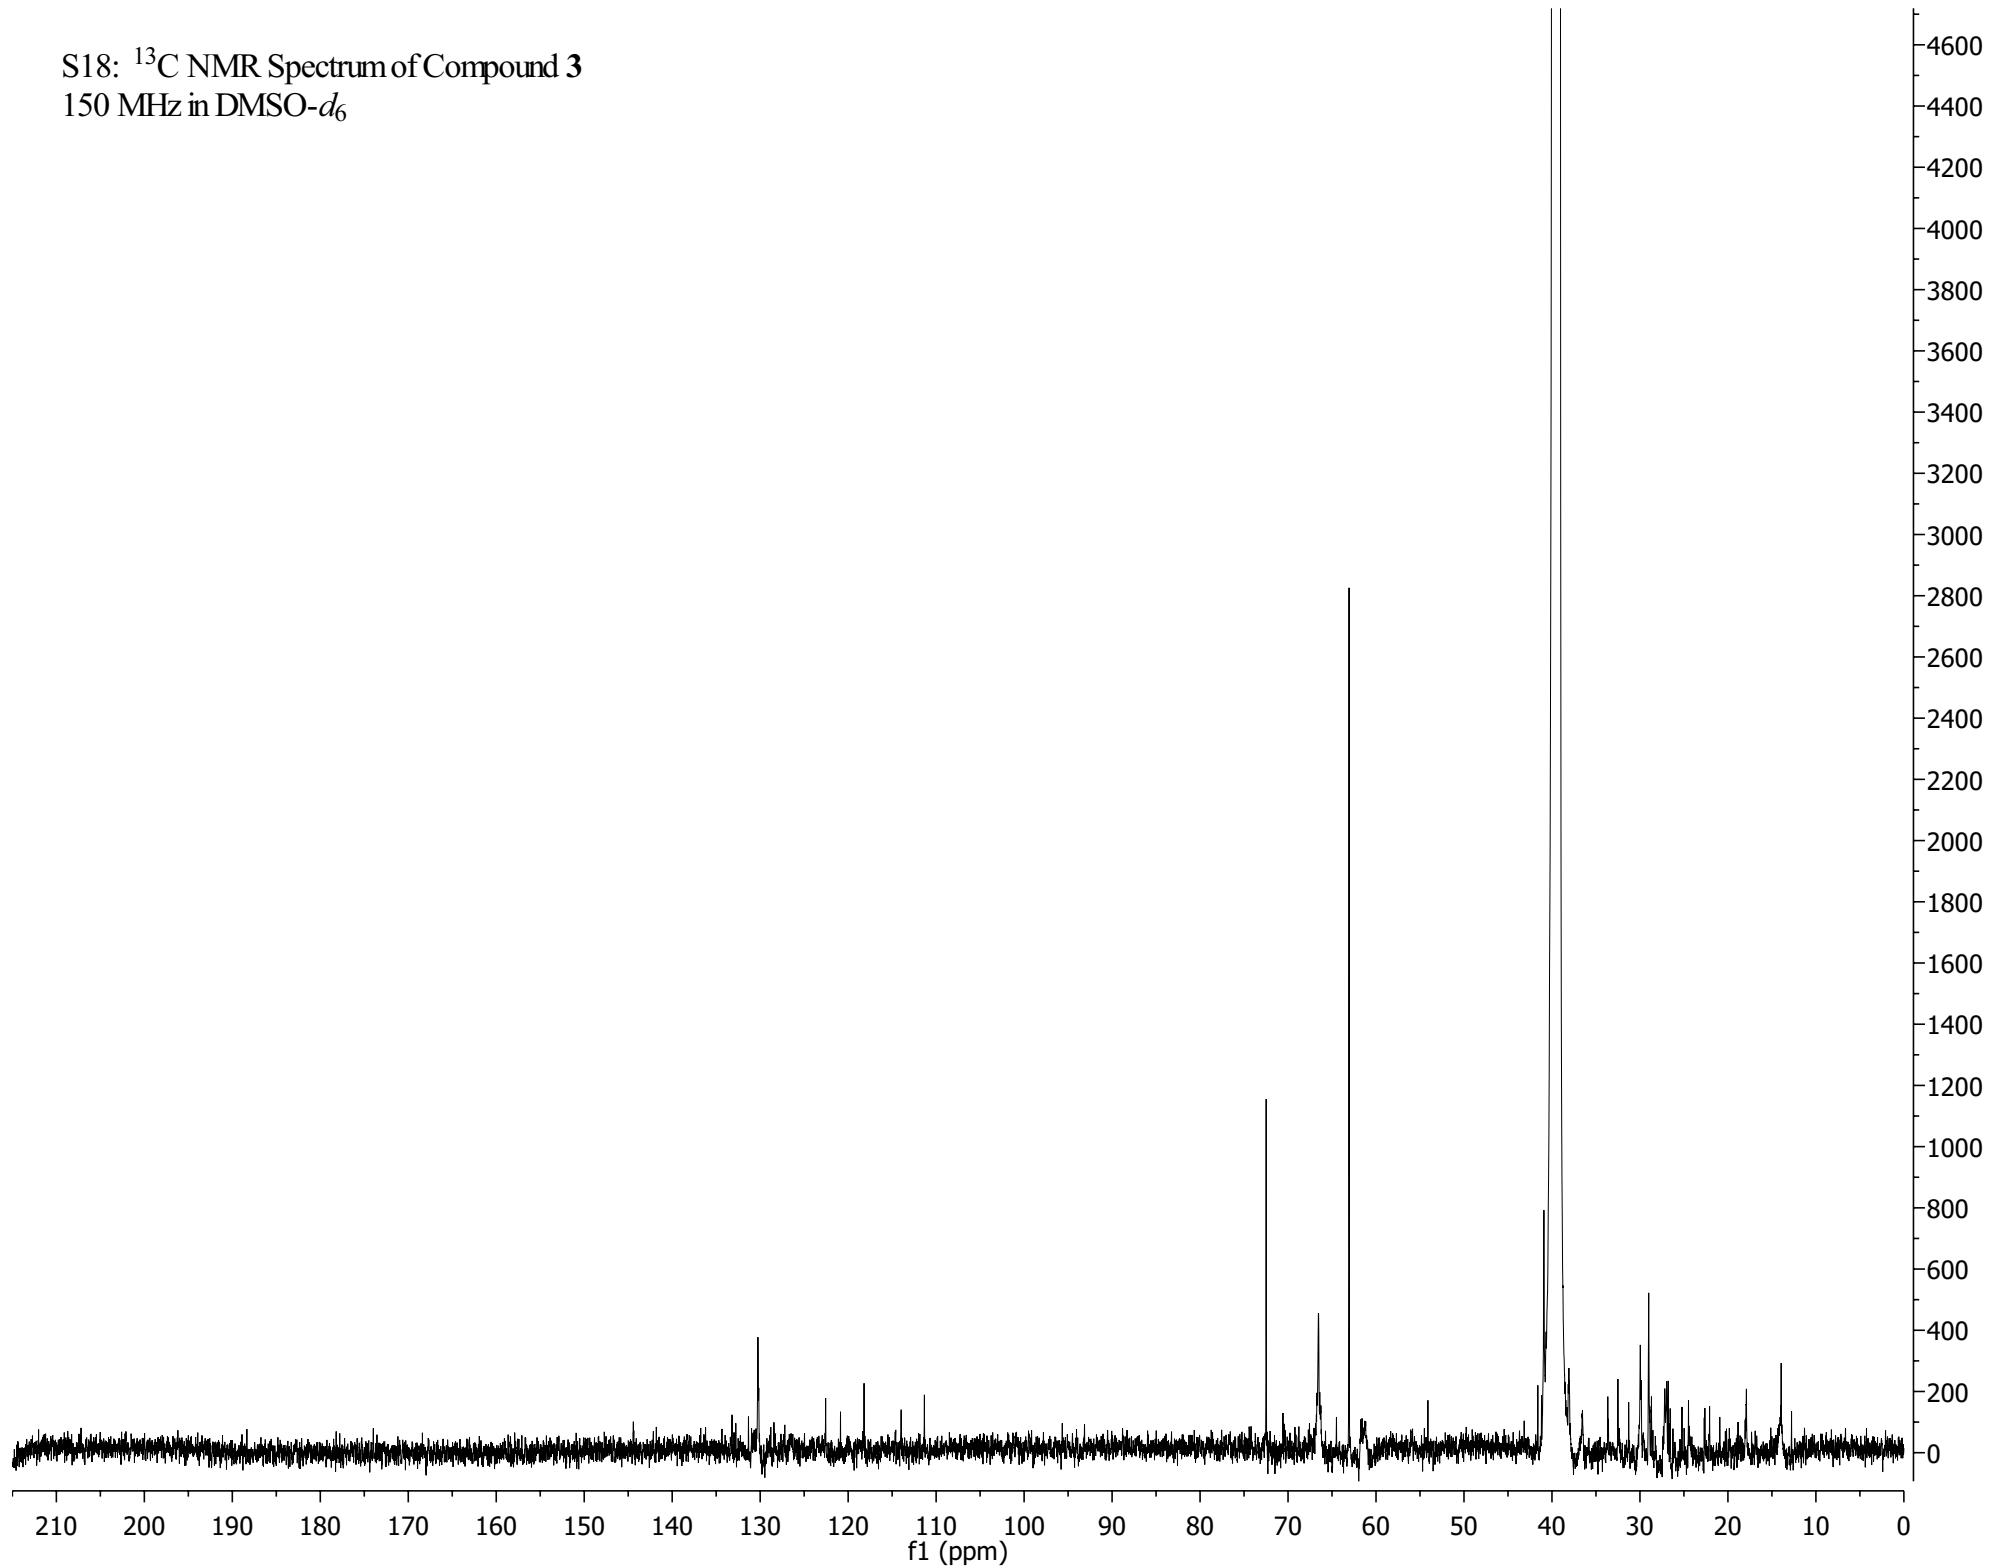

S19: COSY NMR Spectrum of Compound 3  
500 MHz in DMSO- $d_6$

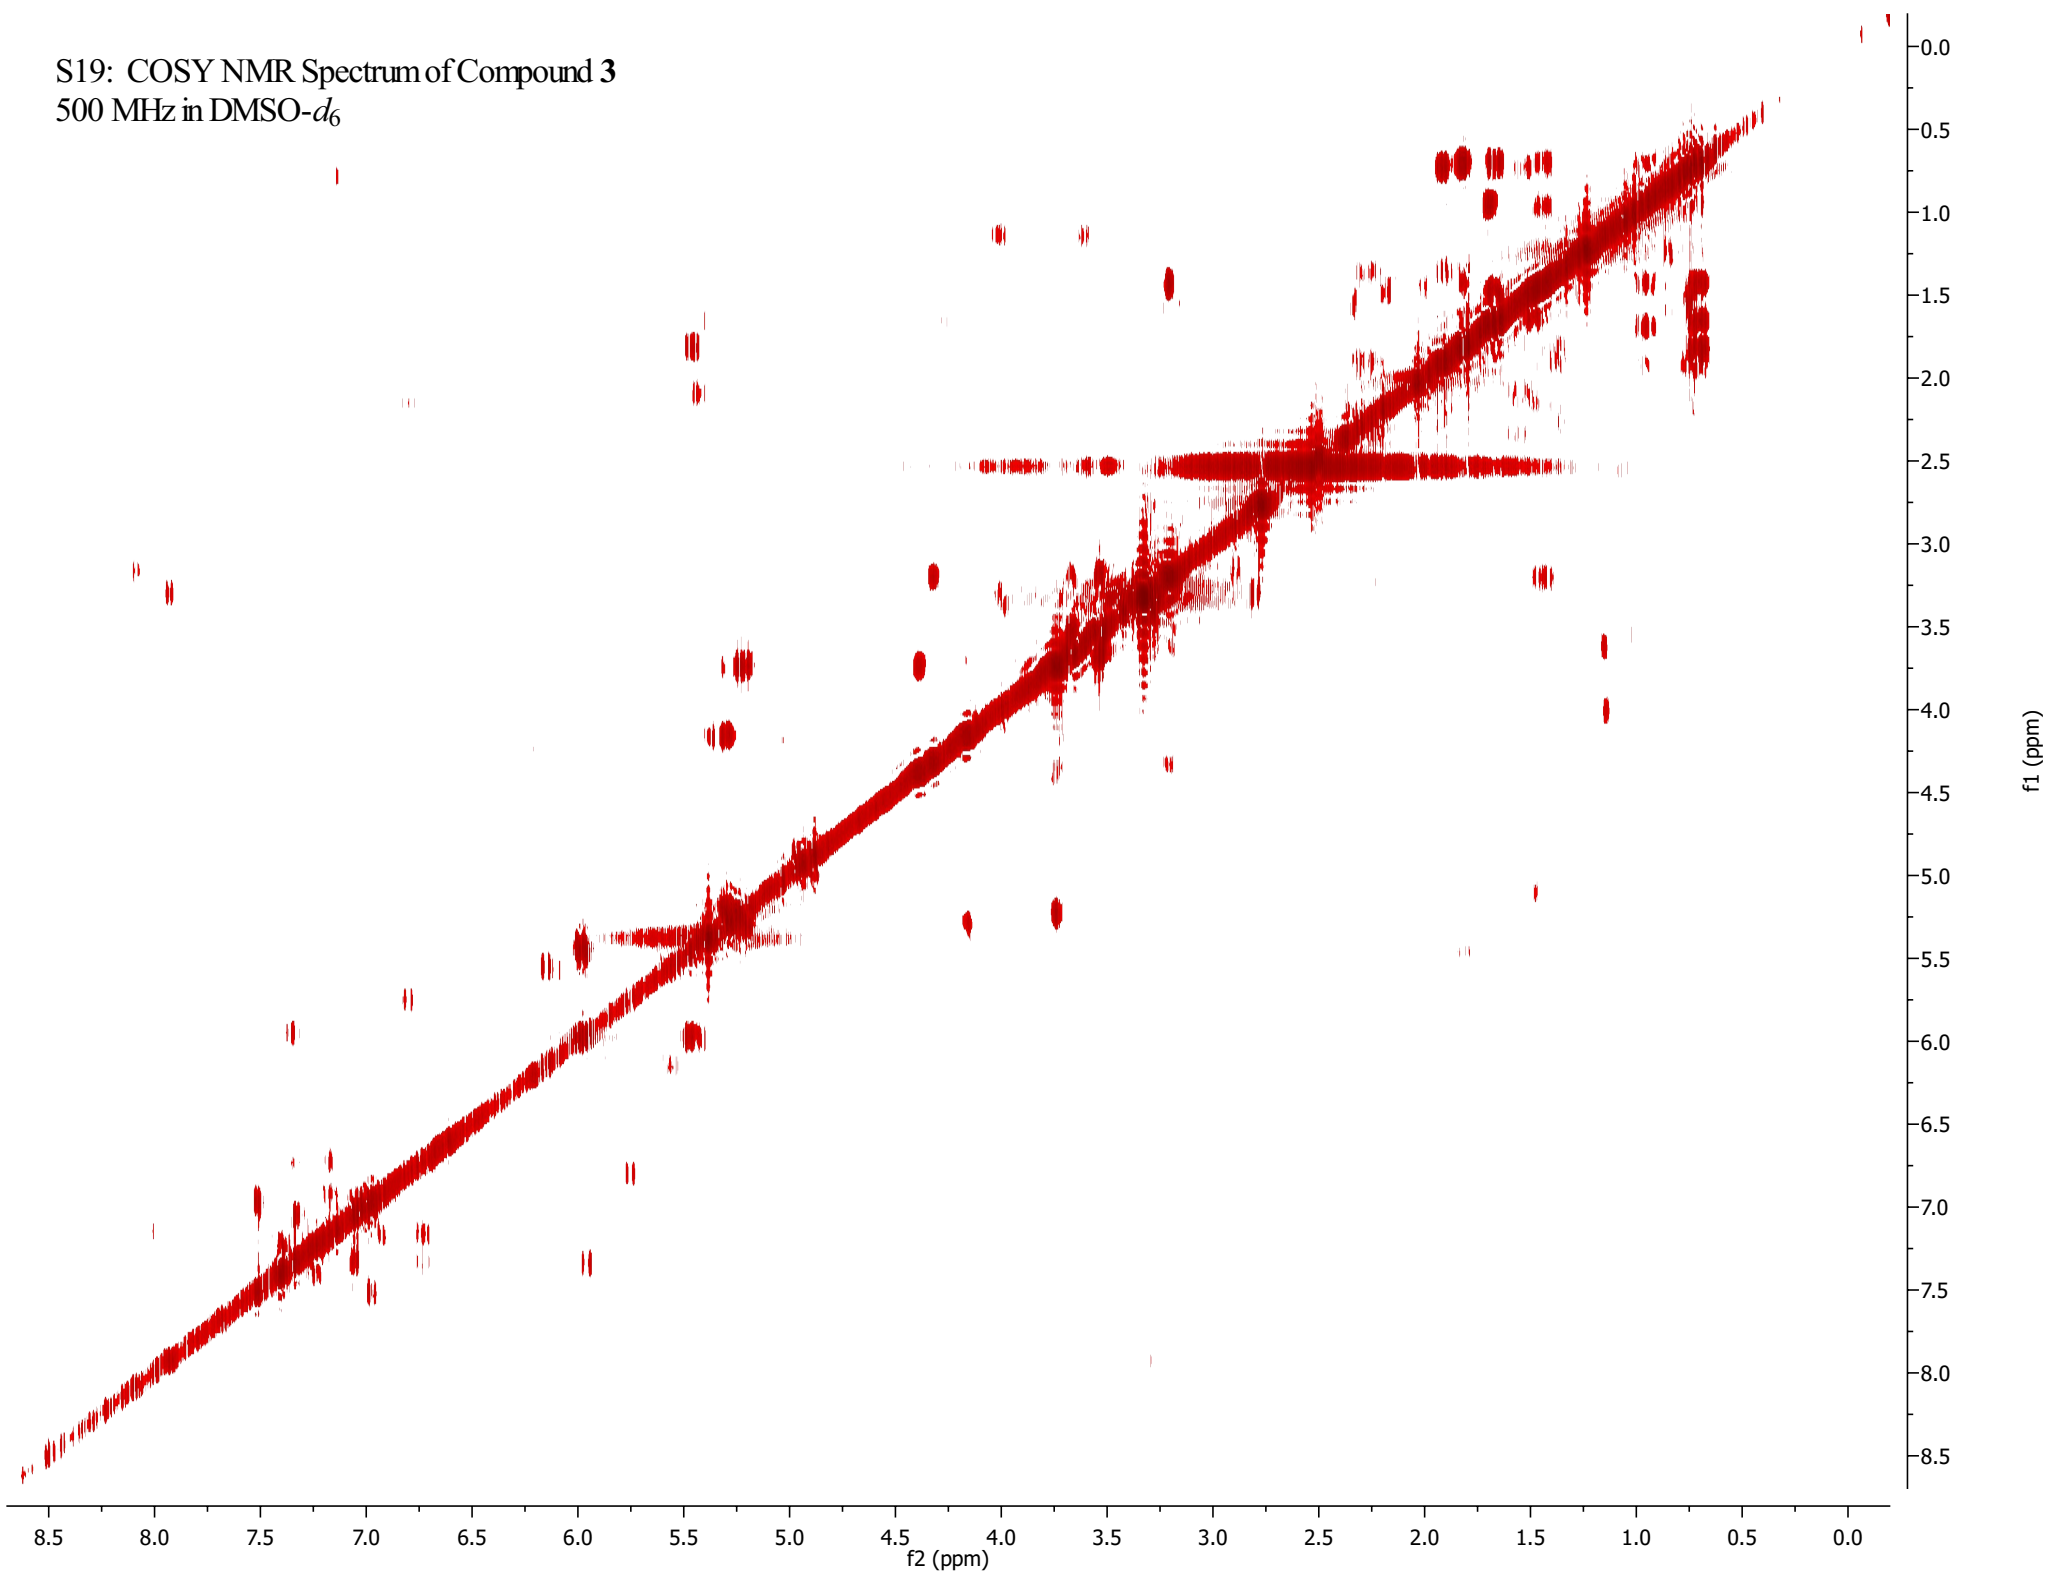

S20: HSQC NMR Spectrum of Compound 3  
500 MHz in DMSO-*d*<sub>6</sub>

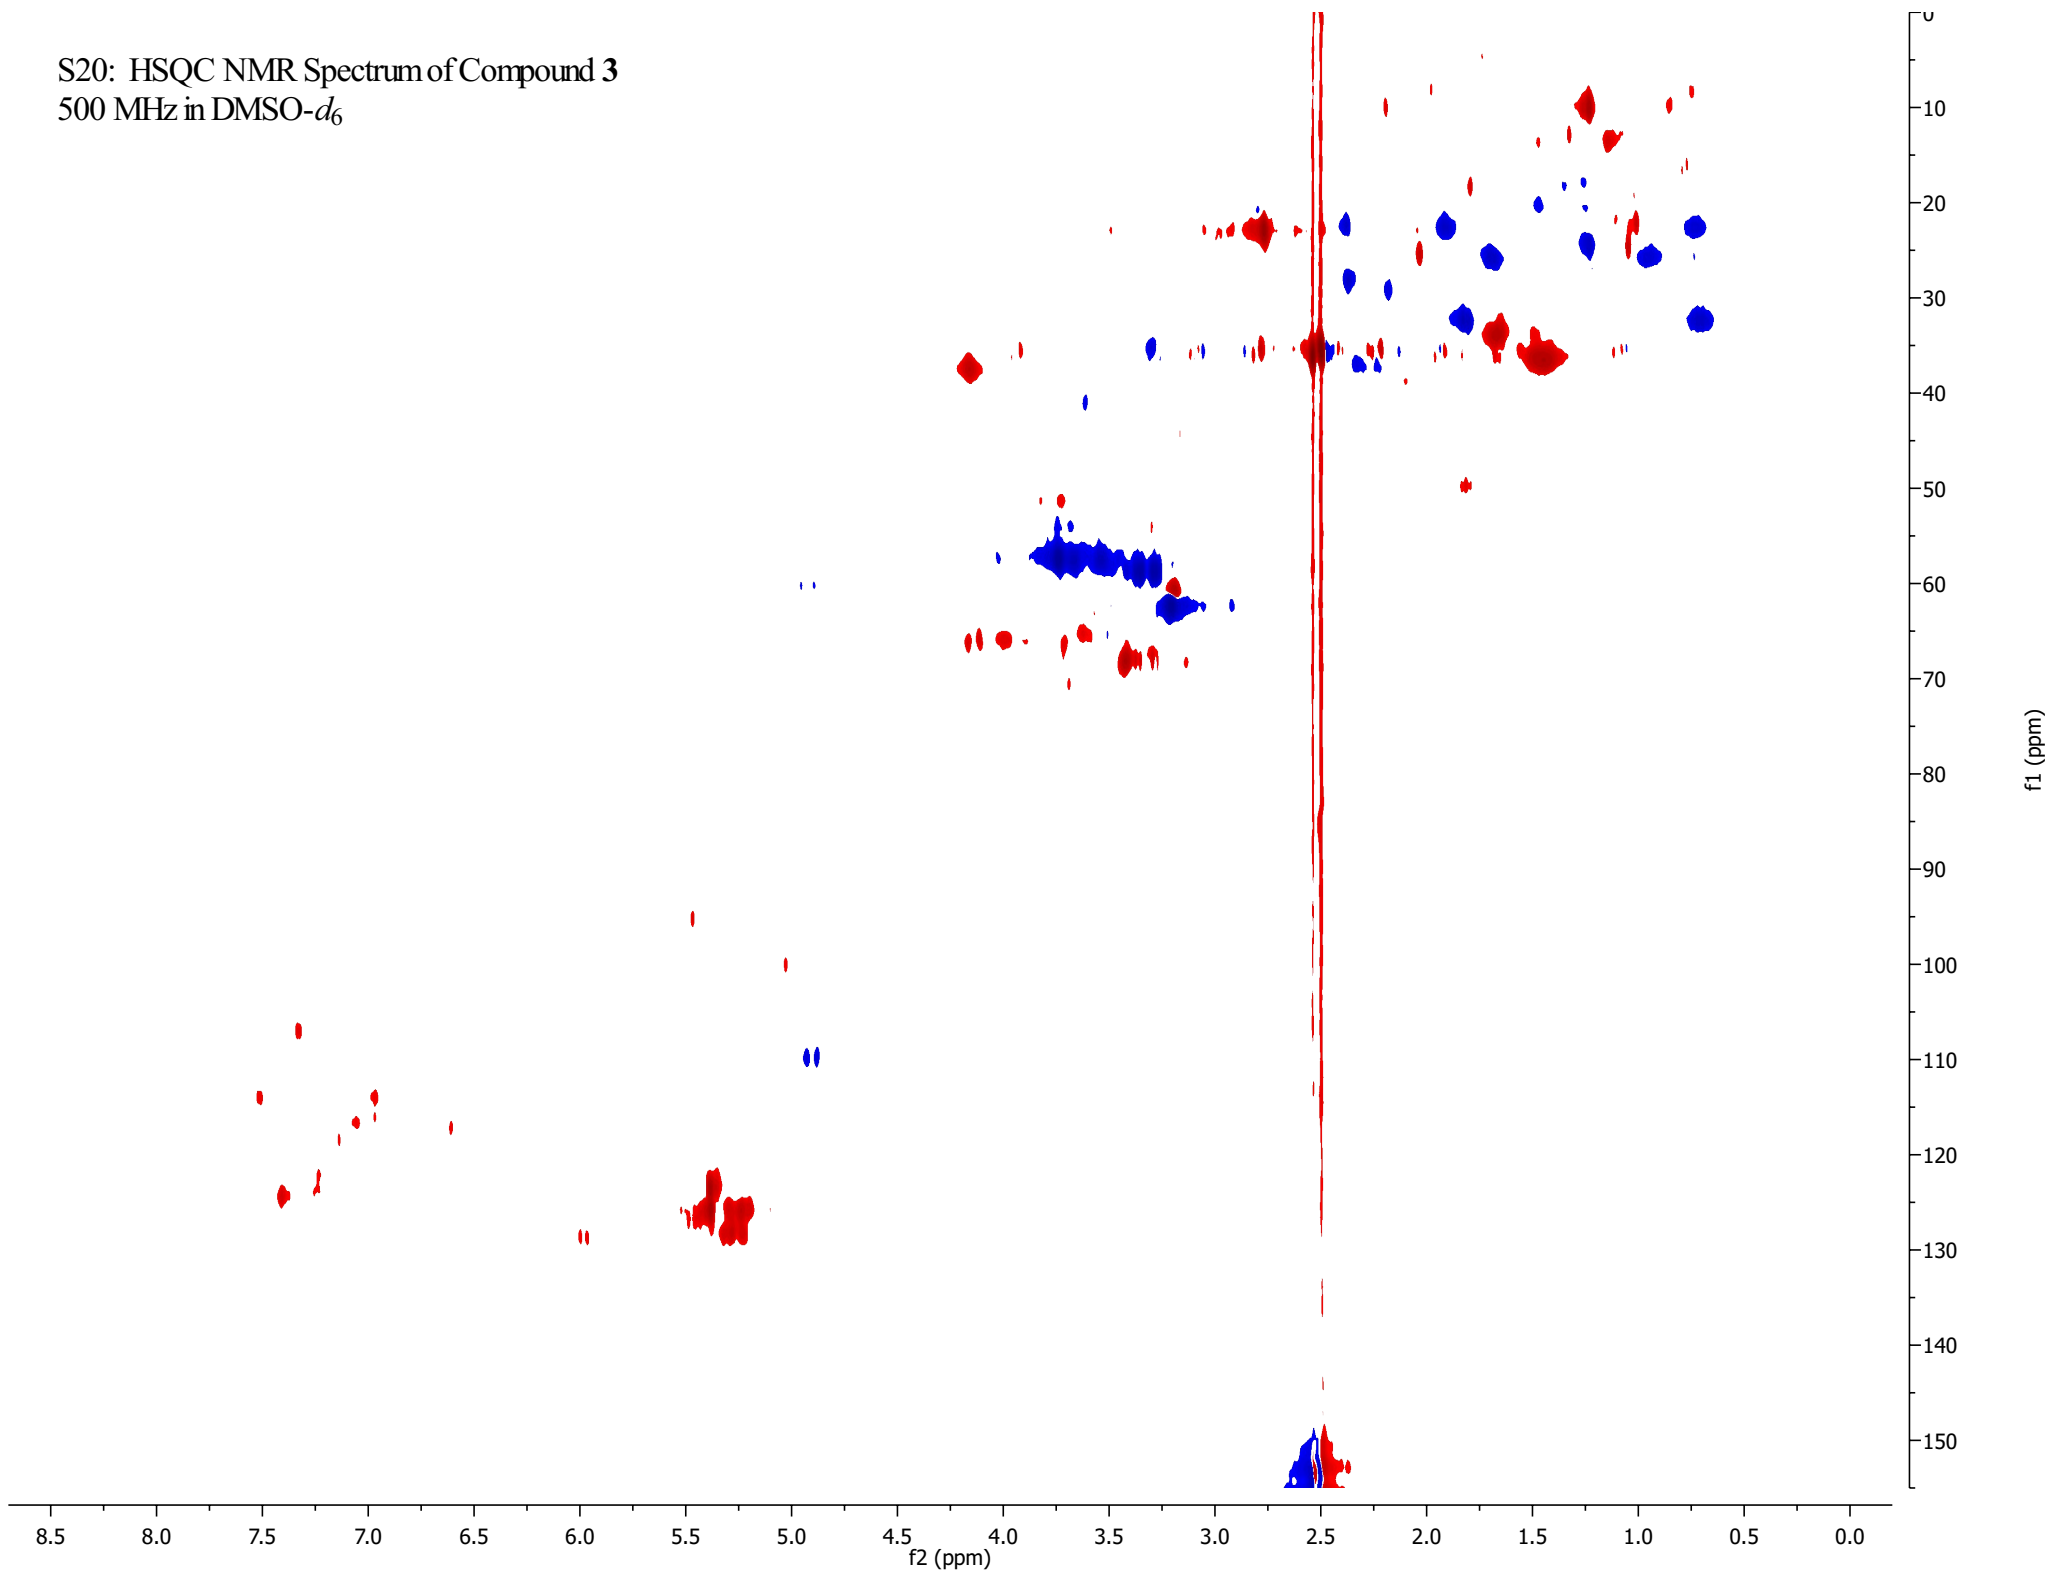

S21: HMBC NMR Spectrum of Compound 3  
500 MHz in DMSO-*d*<sub>6</sub>

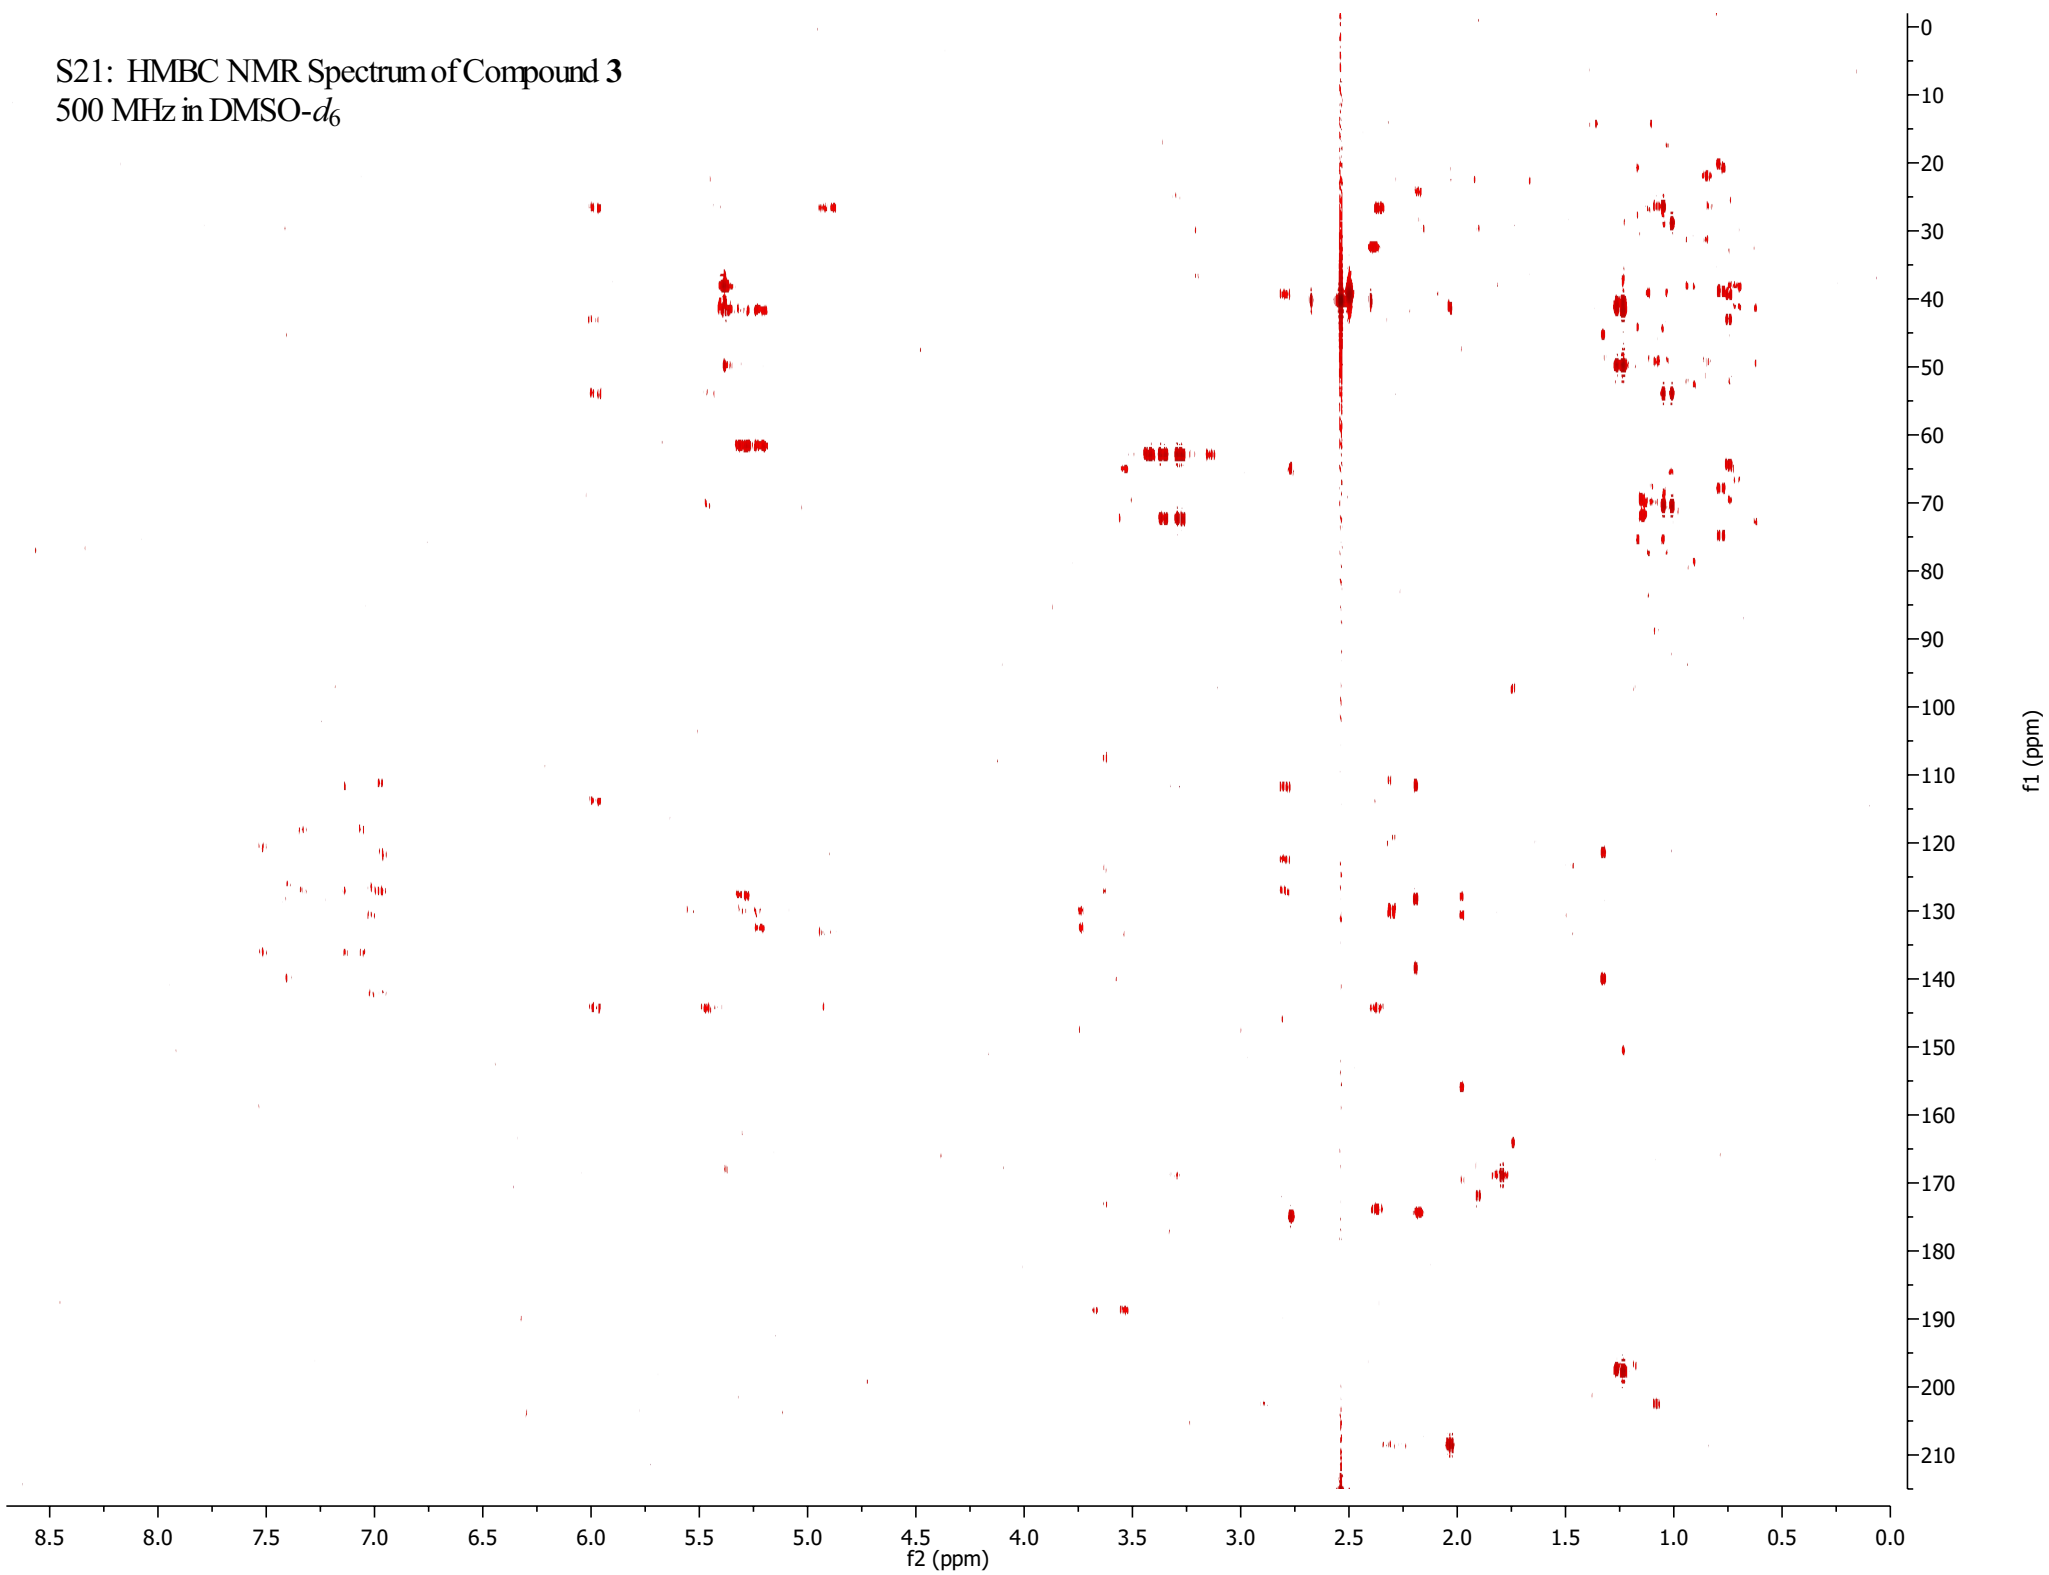

S22: NOESY NMR Spectrum of Compound 5  
500 MHz in DMSO- $d_6$

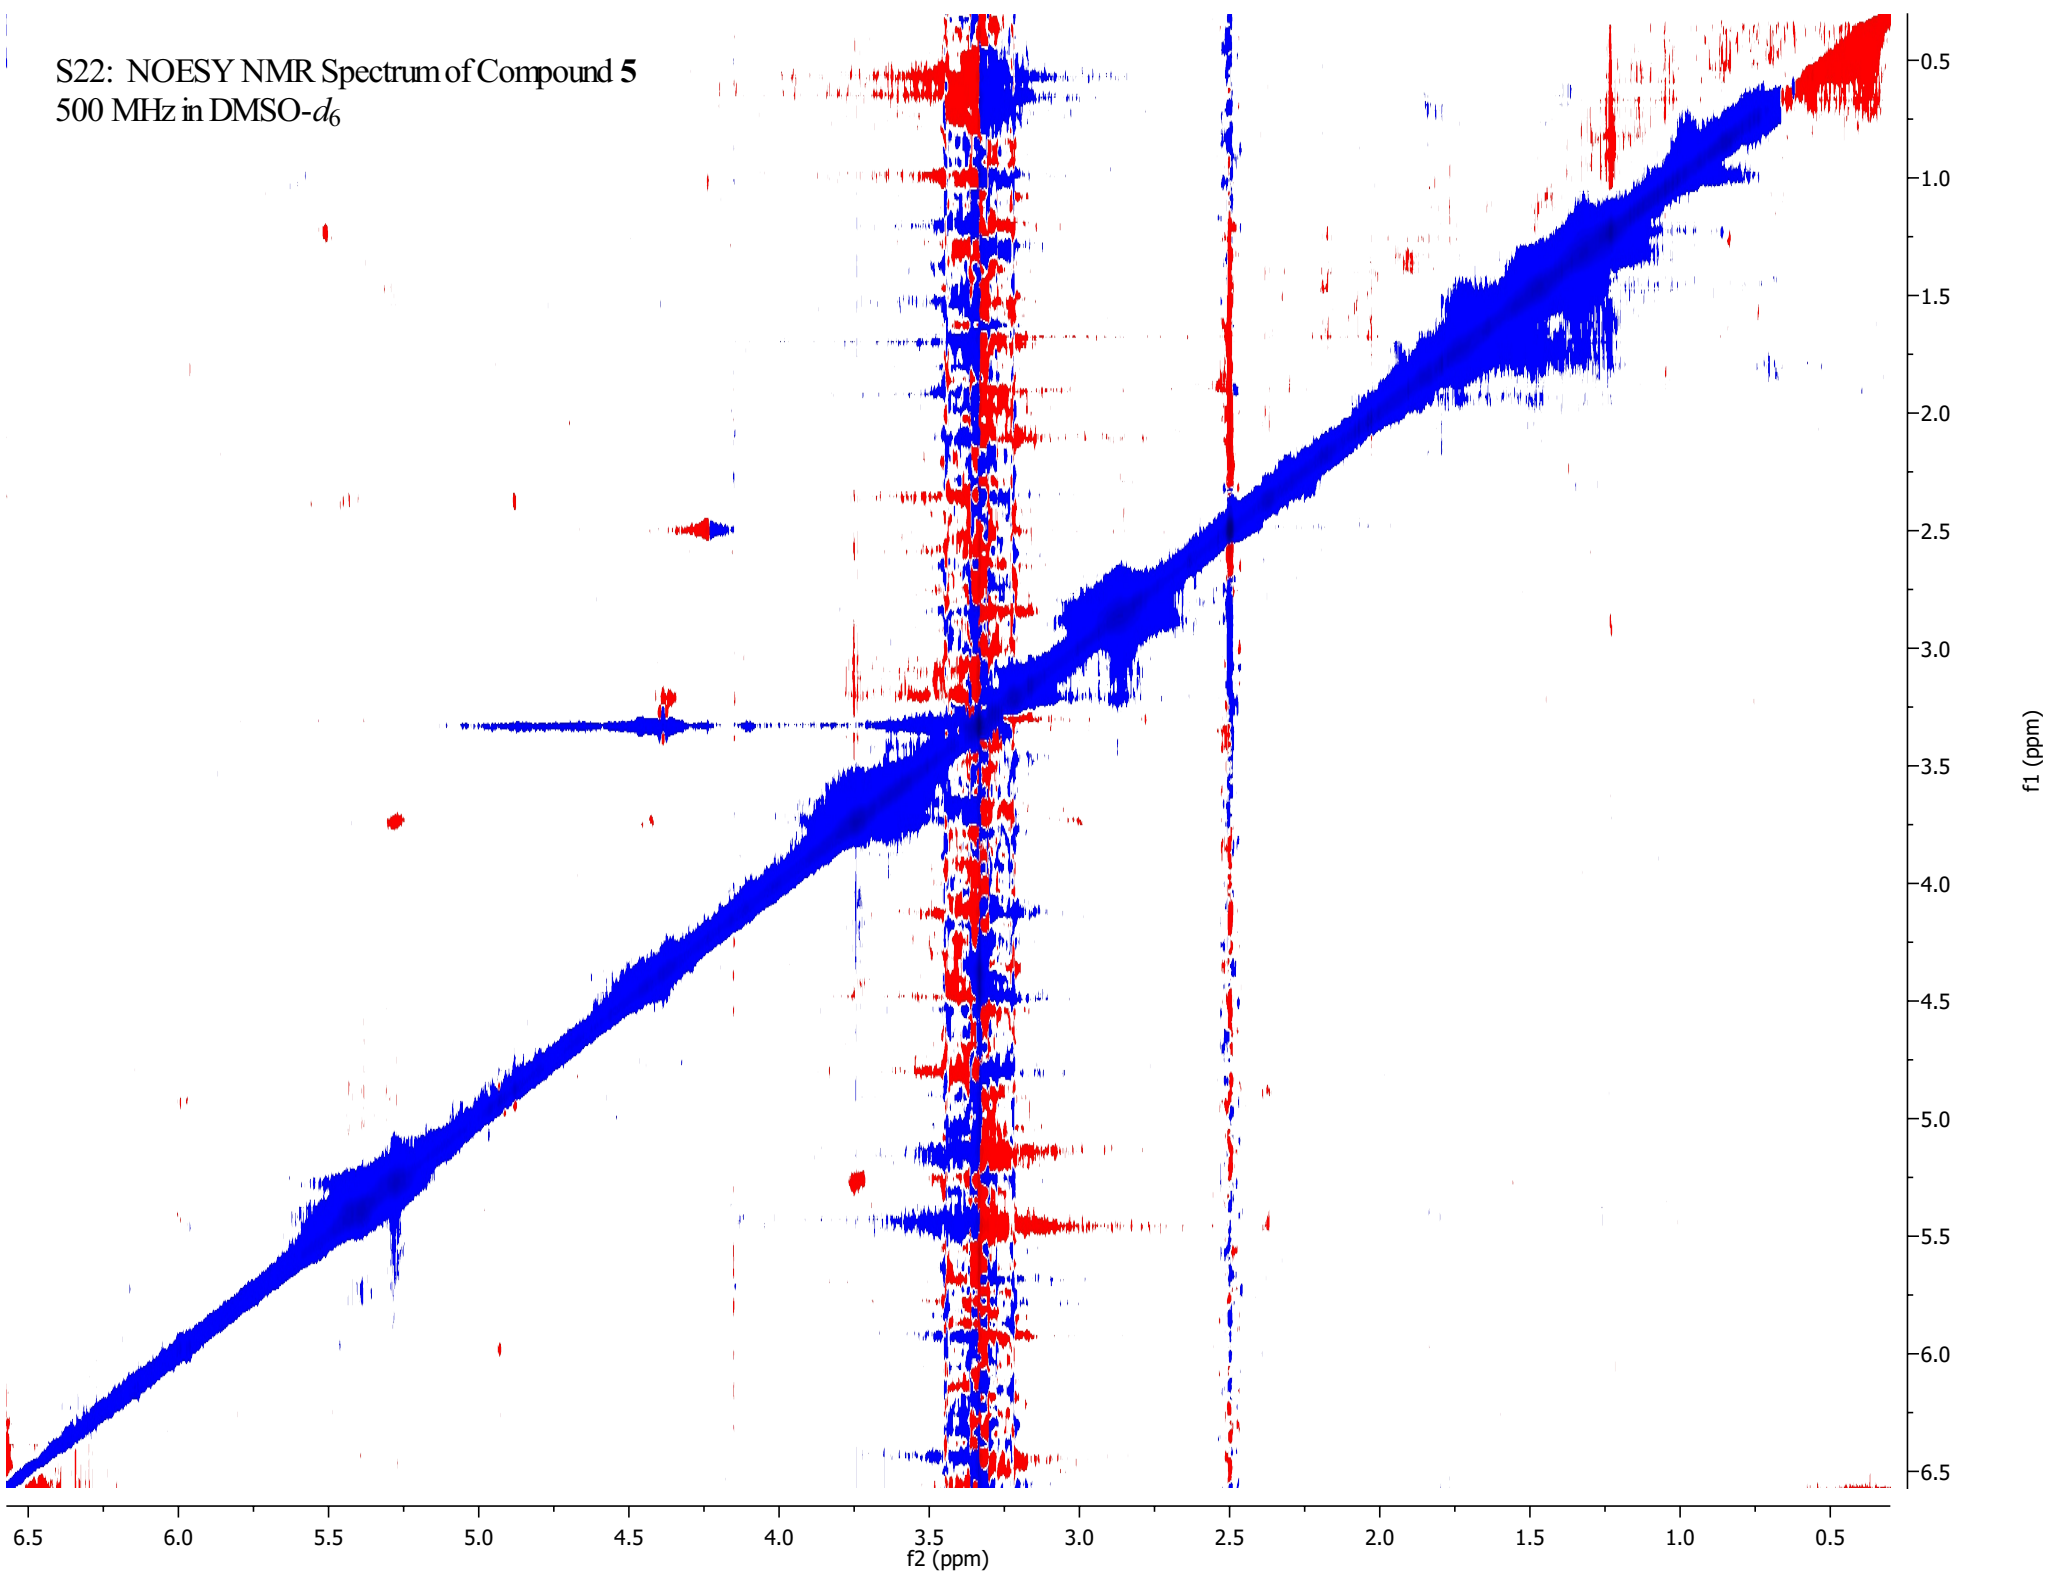

S23: TROESY NMR Spectrum of Compound **5**  
500 MHz in DMSO- $d_6$

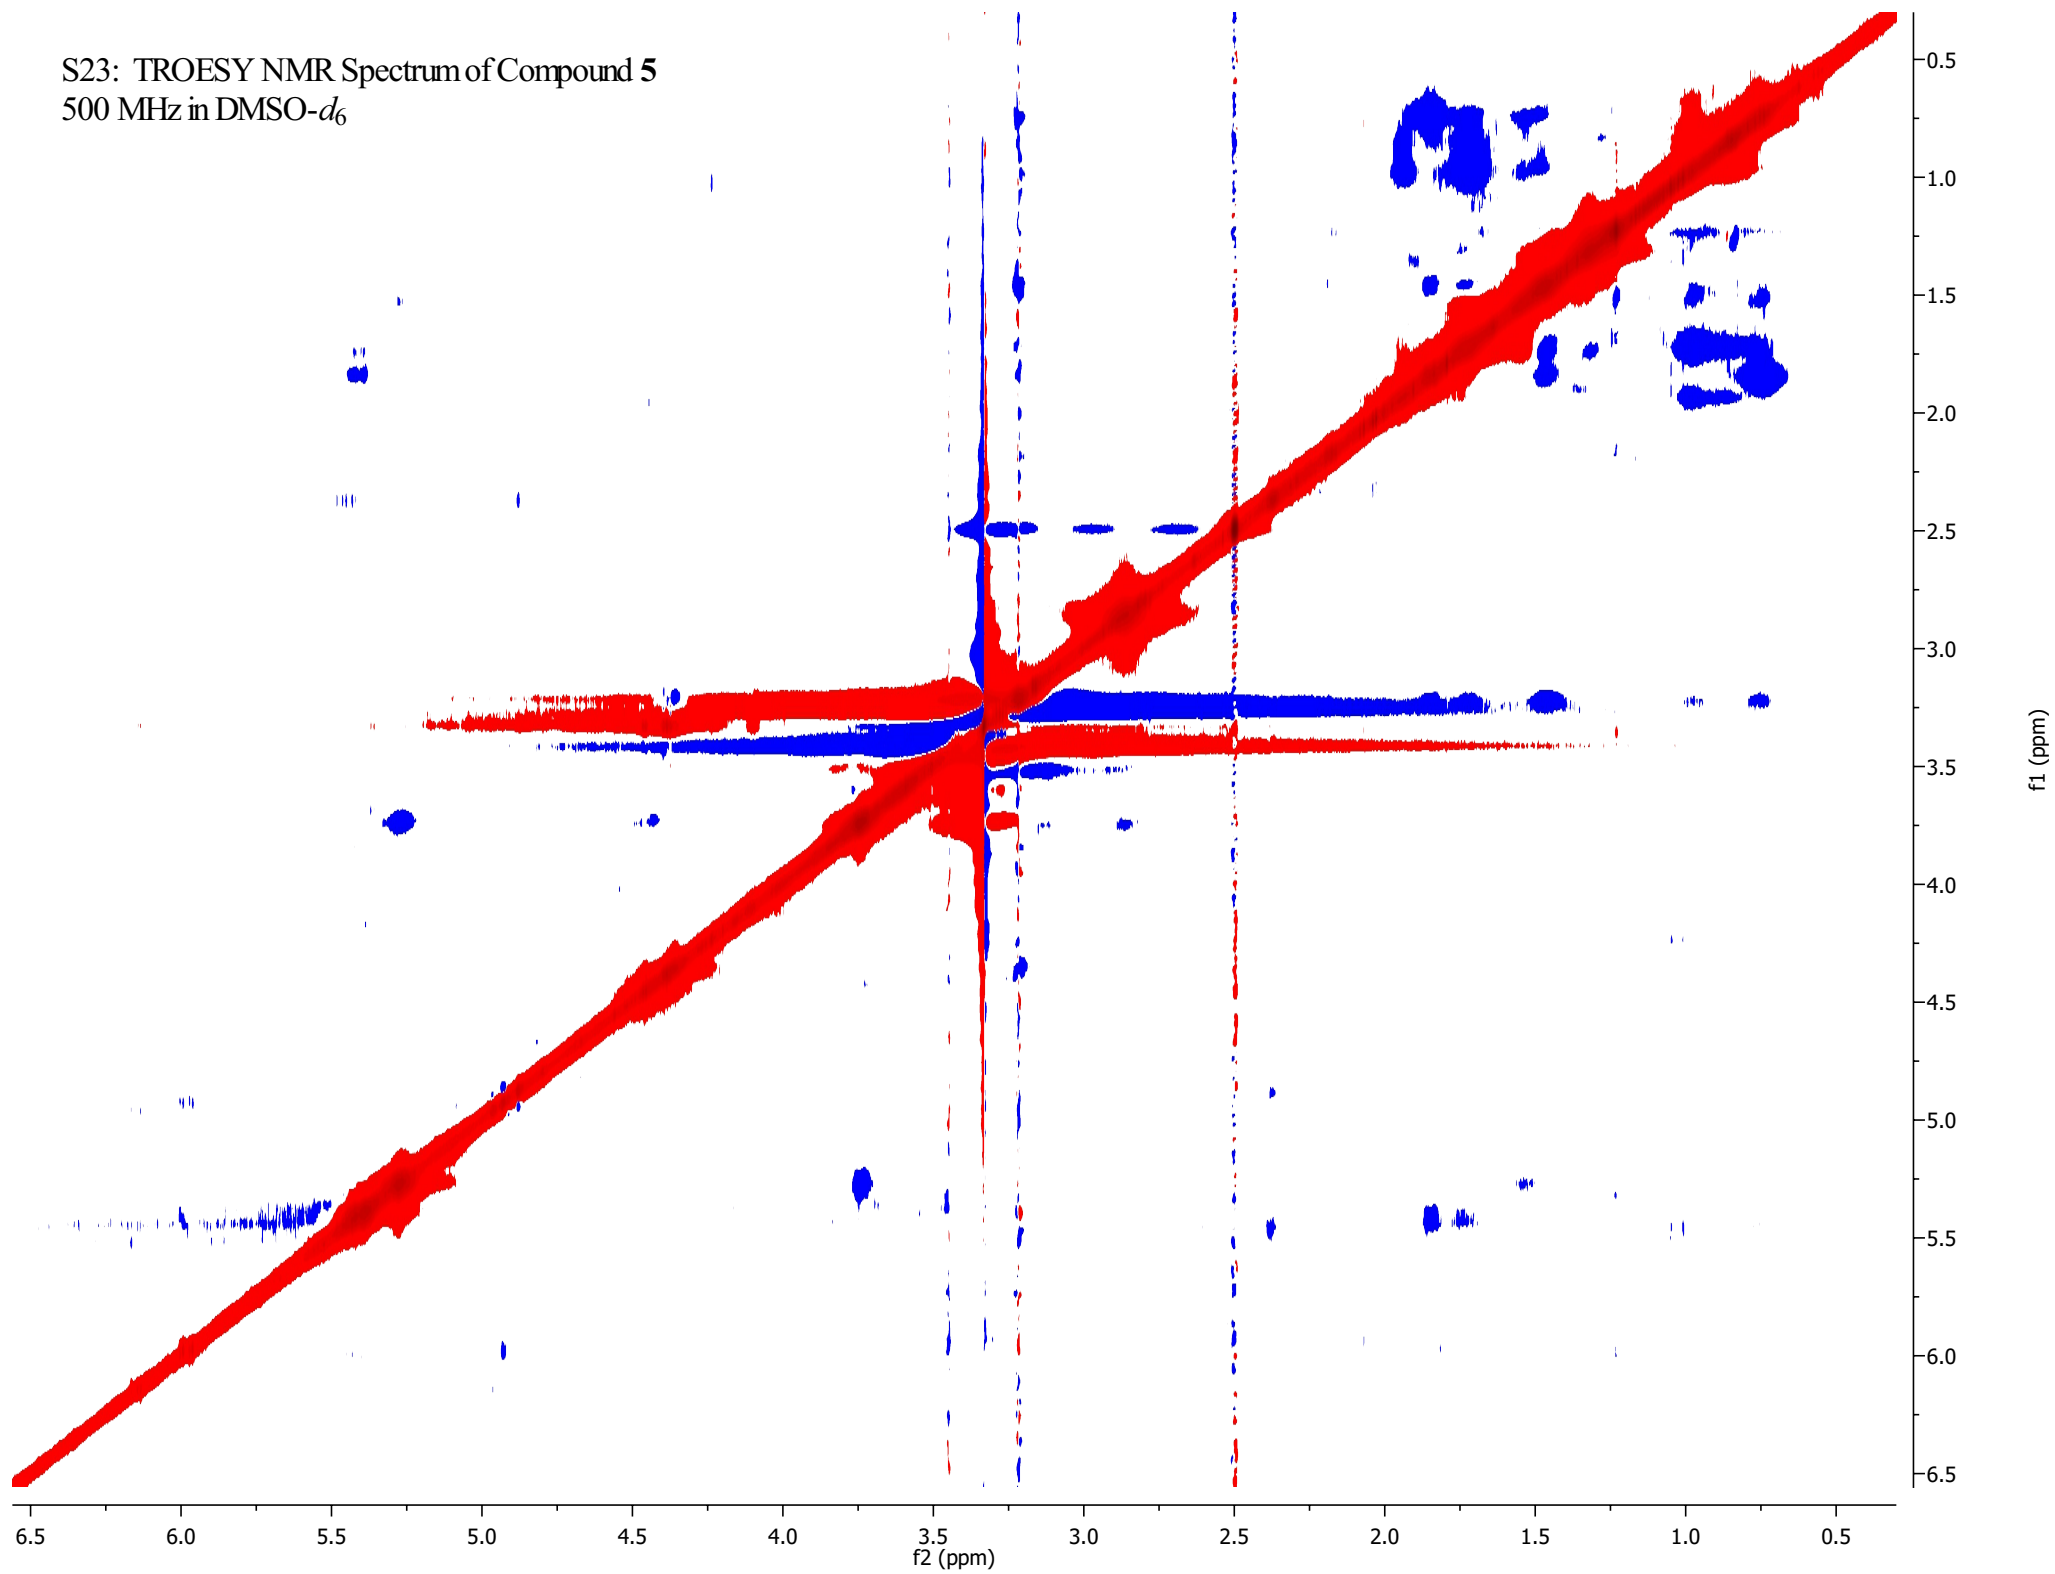

S24: NCI-60 Cell Line Testing Results for Equisetin

| National Cancer Institute Developmental Therapeutics Program<br>In-Vitro Testing Results |           |                     |                                       |       |       |       |       |                |      |      |               |     |         |           |           |  |
|------------------------------------------------------------------------------------------|-----------|---------------------|---------------------------------------|-------|-------|-------|-------|----------------|------|------|---------------|-----|---------|-----------|-----------|--|
| NSC : D - 772378 / 1                                                                     |           |                     | Experiment ID : 1301NS14              |       |       |       |       | Test Type : 08 |      |      | Units : Molar |     |         |           |           |  |
| Report Date : February 11, 2013                                                          |           |                     | Test Date : January 28, 2013          |       |       |       |       | QNS :          |      |      | MC :          |     |         |           |           |  |
| COMI : 126688                                                                            |           |                     | Stain Reagent : SRB Dual-Pass Related |       |       |       |       | SSPL : 0YAT    |      |      |               |     |         |           |           |  |
| Panel/Cell Line                                                                          | Time Zero | Log10 Concentration |                                       |       |       |       |       |                |      |      |               |     | GI50    | TGI       | LC50      |  |
|                                                                                          |           | Ctrl                | Mean Optical Densities                |       |       |       |       | Percent Growth |      |      |               |     |         |           |           |  |
|                                                                                          |           | -8.7                | -7.7                                  | -6.7  | -5.7  | -4.7  | -8.7  | -7.7           | -6.7 | -5.7 | -4.7          |     |         |           |           |  |
| <b>Leukemia</b>                                                                          |           |                     |                                       |       |       |       |       |                |      |      |               |     |         |           |           |  |
| CCRF-CEM                                                                                 | 0.856     | 2.298               | 2.442                                 | 1.633 | 1.451 | 1.331 | 0.991 | 109            | 60   | 48   | 41            | 20  | 1.44E-7 | > 2.00E-5 | > 2.00E-5 |  |
| HL-60(TB)                                                                                | 1.006     | 3.181               | 3.237                                 | 3.332 | 3.263 | 2.925 | 0.985 | 103            | 107  | 104  | 88            | -2  | 5.30E-6 | 1.89E-5   | > 2.00E-5 |  |
| K-562                                                                                    | 0.279     | 2.275               | 2.389                                 | 2.480 | 2.469 | 1.988 | 0.482 | 106            | 110  | 110  | 86            | 10  | 5.93E-6 | > 2.00E-5 | > 2.00E-5 |  |
| MOLT-4                                                                                   | 0.625     | 2.425               | 2.608                                 | 2.604 | 2.608 | 2.431 | 0.854 | 110            | 110  | 110  | 100           | 13  | 7.51E-6 | > 2.00E-5 | > 2.00E-5 |  |
| RPMI-8226                                                                                | 0.768     | 2.567               | 2.578                                 | 2.529 | 2.516 | 2.010 | 1.045 | 101            | 98   | 97   | 69            | 15  | 4.52E-6 | > 2.00E-5 | > 2.00E-5 |  |
| SR                                                                                       | 0.258     | 1.413               | 1.349                                 | 1.406 | 1.395 | 1.204 | 0.322 | 94             | 99   | 98   | 82            | 6   | 5.23E-6 | > 2.00E-5 | > 2.00E-5 |  |
| <b>Non-Small Cell Lung Cancer</b>                                                        |           |                     |                                       |       |       |       |       |                |      |      |               |     |         |           |           |  |
| A549(ATCC)                                                                               | 0.365     | 1.698               | 1.698                                 | 1.654 | 1.693 | 1.474 | 0.551 | 100            | 97   | 100  | 83            | 14  | 6.04E-6 | > 2.00E-5 | > 2.00E-5 |  |
| HOP-82                                                                                   | 0.582     | 1.538               | 1.515                                 | 1.487 | 1.500 | 1.450 | 0.798 | 98             | 95   | 96   | 91            | 23  | 7.91E-6 | > 2.00E-5 | > 2.00E-5 |  |
| HOP-92                                                                                   | 1.156     | 1.669               | 1.554                                 | 1.616 | 1.600 | 1.516 | 0.997 | 78             | 90   | 86   | 70            | -14 | 3.48E-6 | 1.37E-5   | > 2.00E-5 |  |
| NCI-H226                                                                                 | 1.166     | 2.369               | 2.318                                 | 2.259 | 2.251 | 2.216 | 1.376 | 96             | 91   | 90   | 87            | 17  | 6.84E-6 | > 2.00E-5 | > 2.00E-5 |  |
| NCI-H23                                                                                  | 0.840     | 2.442               | 2.392                                 | 2.527 | 2.606 | 2.304 | 1.234 | 97             | 105  | 110  | 91            | 25  | 8.32E-6 | > 2.00E-5 | > 2.00E-5 |  |
| NCI-H322M                                                                                | 0.668     | 1.541               | 1.617                                 | 1.640 | 1.676 | 1.656 | 0.807 | 109            | 111  | 115  | 113           | 16  | 8.92E-6 | > 2.00E-5 | > 2.00E-5 |  |
| NCI-H460                                                                                 | 0.344     | 2.986               | 3.092                                 | 2.995 | 3.028 | 2.601 | 0.450 | 104            | 100  | 102  | 85            | 4   | 5.45E-6 | > 2.00E-5 | > 2.00E-5 |  |
| NCI-H522                                                                                 | 0.881     | 2.278               | 2.244                                 | 2.362 | 2.349 | 2.218 | 0.884 | 98             | 106  | 105  | 96            | .   | 6.02E-6 | > 2.00E-5 | > 2.00E-5 |  |
| <b>Colon Cancer</b>                                                                      |           |                     |                                       |       |       |       |       |                |      |      |               |     |         |           |           |  |
| COLO 205                                                                                 | 0.395     | 1.654               | 1.789                                 | 1.760 | 1.799 | 1.600 | 0.448 | 111            | 108  | 112  | 96            | 4   | 6.32E-6 | > 2.00E-5 | > 2.00E-5 |  |
| HCC-2998                                                                                 | 1.107     | 3.286               | 3.287                                 | 3.378 | 3.247 | 3.270 | 0.987 | 100            | 104  | 98   | 99            | -11 | 5.60E-6 | 1.59E-5   | > 2.00E-5 |  |
| HCT-116                                                                                  | 0.197     | 1.621               | 1.691                                 | 1.732 | 1.739 | 1.451 | 0.244 | 105            | 108  | 108  | 88            | 3   | 5.62E-6 | > 2.00E-5 | > 2.00E-5 |  |
| HCT-15                                                                                   | 0.296     | 1.690               | 1.602                                 | 1.467 | 1.501 | 1.333 | 0.344 | 94             | 84   | 86   | 74            | 3   | 4.41E-6 | > 2.00E-5 | > 2.00E-5 |  |
| HT29                                                                                     | 0.342     | 1.701               | 1.654                                 | 1.740 | 1.725 | 1.524 | 0.470 | 97             | 103  | 102  | 87            | 9   | 6.00E-6 | > 2.00E-5 | > 2.00E-5 |  |
| KM12                                                                                     | 0.495     | 2.429               | 2.465                                 | 2.472 | 2.501 | 2.150 | 0.743 | 102            | 102  | 104  | 86            | 13  | 6.16E-6 | > 2.00E-5 | > 2.00E-5 |  |
| SW-620                                                                                   | 0.322     | 1.871               | 1.846                                 | 1.823 | 1.836 | 1.731 | 0.534 | 98             | 97   | 98   | 91            | 14  | 6.77E-6 | > 2.00E-5 | > 2.00E-5 |  |
| <b>CNS Cancer</b>                                                                        |           |                     |                                       |       |       |       |       |                |      |      |               |     |         |           |           |  |
| SF-268                                                                                   | 0.473     | 1.683               | 1.633                                 | 1.670 | 1.661 | 1.538 | 0.782 | 96             | 99   | 98   | 88            | 26  | 8.11E-6 | > 2.00E-5 | > 2.00E-5 |  |
| SF-539                                                                                   | 0.838     | 2.619               | 2.512                                 | 2.404 | 2.477 | 2.455 | 1.121 | 94             | 88   | 92   | 91            | 16  | 7.01E-6 | > 2.00E-5 | > 2.00E-5 |  |
| SNB-19                                                                                   | 0.664     | 2.042               | 1.929                                 | 1.868 | 1.928 | 1.718 | 0.912 | 92             | 87   | 92   | 76            | 18  | 5.67E-6 | > 2.00E-5 | > 2.00E-5 |  |
| SNB-75                                                                                   | 0.961     | 1.546               | 1.407                                 | 1.387 | 1.450 | 1.433 | 1.119 | 76             | 73   | 84   | 81            | 27  | 7.45E-6 | > 2.00E-5 | > 2.00E-5 |  |
| U251                                                                                     | 0.660     | 2.567               | 2.453                                 | 2.422 | 2.452 | 2.165 | 0.878 | 94             | 92   | 94   | 79            | 11  | 5.36E-6 | > 2.00E-5 | > 2.00E-5 |  |
| <b>Melanoma</b>                                                                          |           |                     |                                       |       |       |       |       |                |      |      |               |     |         |           |           |  |
| LOX IMVI                                                                                 | 0.470     | 2.868               | 2.723                                 | 2.859 | 2.758 | 2.696 | 1.091 | 94             | 100  | 95   | 93            | 26  | 8.72E-6 | > 2.00E-5 | > 2.00E-5 |  |
| MALME-3M                                                                                 | 0.869     | 1.716               | 1.681                                 | 1.740 | 1.699 | 1.648 | 1.071 | 96             | 103  | 98   | 92            | 24  | 8.25E-6 | > 2.00E-5 | > 2.00E-5 |  |
| M14                                                                                      | 0.558     | 2.156               | 2.234                                 | 2.229 | 2.182 | 1.933 | 0.581 | 105            | 105  | 102  | 86            | 1   | 5.34E-6 | > 2.00E-5 | > 2.00E-5 |  |
| SK-MEL-2                                                                                 | 1.124     | 2.004               | 2.097                                 | 2.088 | 2.171 | 2.186 | 1.170 | 111            | 110  | 119  | 121           | 5   | 8.19E-6 | > 2.00E-5 | > 2.00E-5 |  |
| SK-MEL-28                                                                                | 0.705     | 1.886               | 1.842                                 | 1.790 | 1.854 | 1.698 | 0.892 | 96             | 92   | 97   | 84            | 16  | 6.31E-6 | > 2.00E-5 | > 2.00E-5 |  |
| SK-MEL-5                                                                                 | 0.884     | 2.758               | 2.766                                 | 2.688 | 2.688 | 2.490 | 0.836 | 100            | 96   | 96   | 86            | -5  | 4.92E-6 | 1.74E-5   | > 2.00E-5 |  |
| UACC-257                                                                                 | 1.128     | 2.297               | 2.242                                 | 2.218 | 2.243 | 2.293 | 1.245 | 95             | 93   | 95   | 100           | 10  | 7.16E-6 | > 2.00E-5 | > 2.00E-5 |  |
| UACC-62                                                                                  | 0.905     | 2.518               | 2.470                                 | 2.343 | 2.447 | 2.157 | 0.685 | 97             | 89   | 96   | 78            | -24 | 3.73E-6 | 1.15E-5   | > 2.00E-5 |  |
| <b>Ovarian Cancer</b>                                                                    |           |                     |                                       |       |       |       |       |                |      |      |               |     |         |           |           |  |
| IGROV1                                                                                   | 0.630     | 1.682               | 1.749                                 | 1.683 | 1.781 | 1.659 | 0.807 | 106            | 100  | 109  | 98            | 17  | 7.78E-6 | > 2.00E-5 | > 2.00E-5 |  |
| OVCAR-3                                                                                  | 0.518     | 1.653               | 1.709                                 | 1.750 | 1.681 | 1.353 | 0.587 | 105            | 109  | 103  | 74            | 6   | 4.47E-6 | > 2.00E-5 | > 2.00E-5 |  |
| OVCAR-4                                                                                  | 0.596     | 1.144               | 1.159                                 | 1.097 | 1.157 | 0.980 | 0.583 | 103            | 91   | 102  | 70            | -2  | 3.80E-6 | 1.87E-5   | > 2.00E-5 |  |
| OVCAR-5                                                                                  | 0.539     | 1.897               | 1.827                                 | 1.818 | 1.717 | 1.667 | 0.908 | 95             | 94   | 87   | 83            | 27  | 7.80E-6 | > 2.00E-5 | > 2.00E-5 |  |
| OVCAR-8                                                                                  | 0.468     | 2.026               | 1.964                                 | 1.979 | 1.996 | 1.663 | 0.556 | 96             | 97   | 98   | 77            | 6   | 4.75E-6 | > 2.00E-5 | > 2.00E-5 |  |
| NCI/ADR-RES                                                                              | 0.686     | 2.385               | 2.242                                 | 2.410 | 2.454 | 2.250 | 0.812 | 92             | 101  | 104  | 92            | 7   | 6.28E-6 | > 2.00E-5 | > 2.00E-5 |  |
| SK-OV-3                                                                                  | 0.776     | 1.651               | 1.709                                 | 1.724 | 1.694 | 1.738 | 0.883 | 107            | 108  | 105  | 110           | 12  | 8.22E-6 | > 2.00E-5 | > 2.00E-5 |  |
| <b>Renal Cancer</b>                                                                      |           |                     |                                       |       |       |       |       |                |      |      |               |     |         |           |           |  |
| 786-0                                                                                    | 0.568     | 2.352               | 2.286                                 | 2.304 | 2.327 | 2.213 | 0.893 | 96             | 97   | 99   | 92            | 18  | 7.43E-6 | > 2.00E-5 | > 2.00E-5 |  |
| A498                                                                                     | 1.632     | 2.496               | 2.464                                 | 2.346 | 2.376 | 2.400 | 1.682 | 96             | 83   | 86   | 89            | 6   | 5.88E-6 | > 2.00E-5 | > 2.00E-5 |  |
| ACHN                                                                                     | 0.366     | 1.792               | 1.799                                 | 1.756 | 1.695 | 1.601 | 0.471 | 101            | 97   | 93   | 87            | 7   | 5.79E-6 | > 2.00E-5 | > 2.00E-5 |  |
| RXF 393                                                                                  | 0.803     | 1.327               | 1.297                                 | 1.294 | 1.303 | 1.261 | 0.828 | 94             | 94   | 95   | 87            | 5   | 5.67E-6 | > 2.00E-5 | > 2.00E-5 |  |
| SN12C                                                                                    | 0.700     | 2.460               | 2.250                                 | 2.218 | 2.224 | 2.000 | 0.858 | 88             | 86   | 87   | 74            | 9   | 4.67E-6 | > 2.00E-5 | > 2.00E-5 |  |
| TK-10                                                                                    | 0.753     | 1.664               | 1.618                                 | 1.668 | 1.711 | 1.627 | 0.894 | 95             | 100  | 105  | 96            | 15  | 7.44E-6 | > 2.00E-5 | > 2.00E-5 |  |
| UO-31                                                                                    | 0.938     | 2.074               | 1.949                                 | 1.989 | 1.971 | 1.868 | 0.981 | 89             | 92   | 91   | 82            | 4   | 5.11E-6 | > 2.00E-5 | > 2.00E-5 |  |
| <b>Prostate Cancer</b>                                                                   |           |                     |                                       |       |       |       |       |                |      |      |               |     |         |           |           |  |
| PC-3                                                                                     | 0.538     | 2.126               | 2.105                                 | 2.047 | 2.056 | 1.604 | 0.647 | 99             | 95   | 96   | 67            | 7   | 3.85E-6 | > 2.00E-5 | > 2.00E-5 |  |
| DU-145                                                                                   | 0.393     | 1.574               | 1.672                                 | 1.654 | 1.691 | 1.501 | 0.678 | 108            | 107  | 110  | 94            | 24  | 8.50E-6 | > 2.00E-5 | > 2.00E-5 |  |
| <b>Breast Cancer</b>                                                                     |           |                     |                                       |       |       |       |       |                |      |      |               |     |         |           |           |  |
| MCF7                                                                                     | 0.469     | 2.411               | 2.235                                 | 2.227 | 2.277 | 1.781 | 0.588 | 91             | 91   | 93   | 68            | 6   | 3.86E-6 | > 2.00E-5 | > 2.00E-5 |  |
| MDA-MB-231(ATCC)                                                                         | 0.665     | 1.562               | 1.553                                 | 1.463 | 1.510 | 1.541 | 0.759 | 99             | 89   | 94   | 98            | 10  | 7.04E-6 | > 2.00E-5 | > 2.00E-5 |  |
| HS 578T                                                                                  | 1.134     | 2.077               | 1.975                                 | 1.930 | 1.971 | 1.919 | 1.358 | 89             | 84   | 89   | 83            | 24  | 7.24E-6 | > 2.00E-5 | > 2.00E-5 |  |
| BT-549                                                                                   | 0.955     | 1.905               | 1.915                                 | 1.949 | 1.888 | 1.904 | 1.096 | 101            | 105  | 98   | 100           | 15  | 7.72E-6 | > 2.00E-5 | > 2.00E-5 |  |
| T-47D                                                                                    | 1.178     | 2.137               | 2.117                                 | 2.102 | 2.135 | 2.082 | 1.075 | 98             | 96   | 100  | 94            | -9  | 5.38E-6 | 1.64E-5   | > 2.00E-5 |  |
| MDA-MB-468                                                                               | 0.878     | 1.774               | 1.710                                 | 1.673 | 1.681 | 1.333 | 0.780 | 93             | 89   | 90   | 51            | -11 | 2.06E-6 | 1.32E-5   | > 2.00E-5 |  |



## S25: CD Spectra of Compounds 1-3 and Ophiosetin Compared to Equisetin

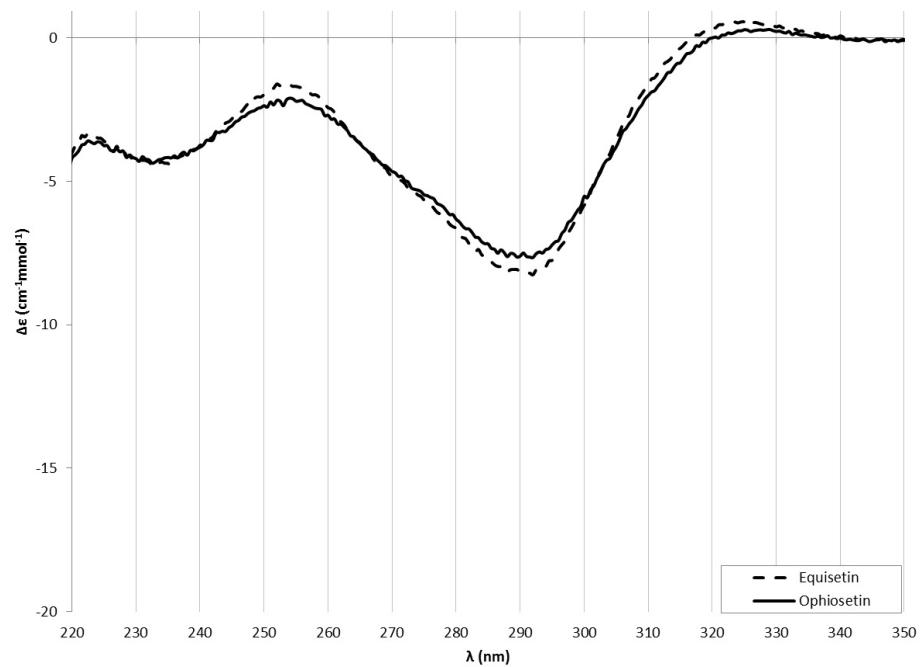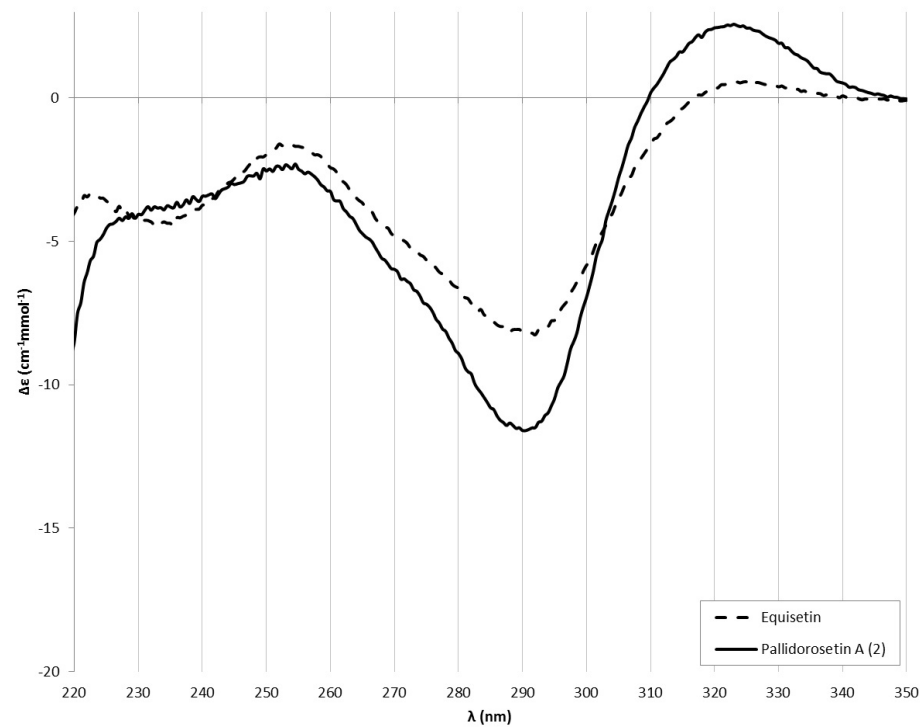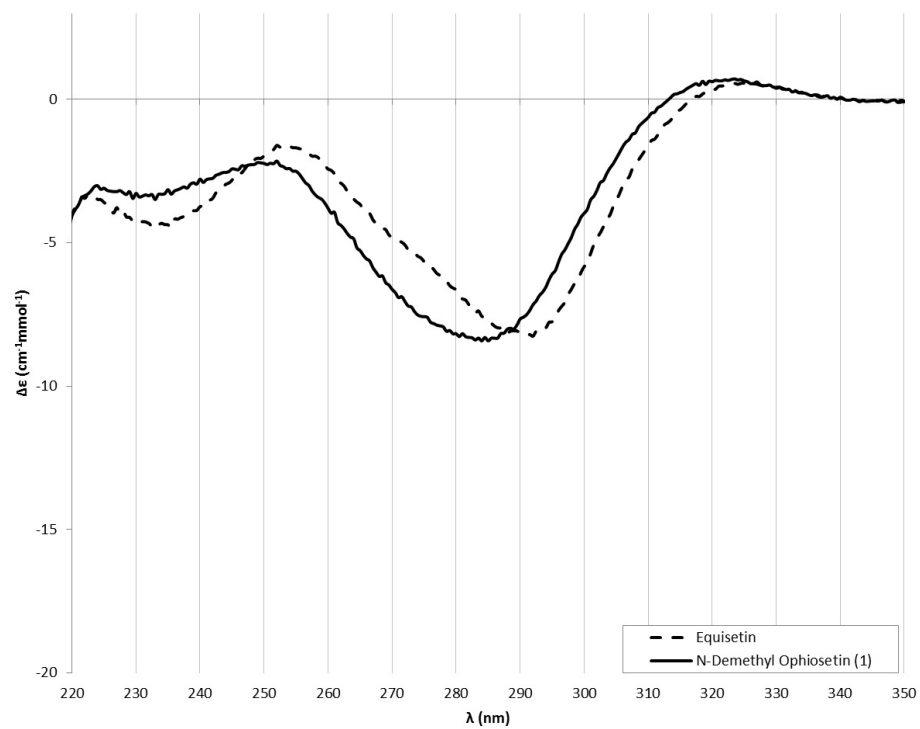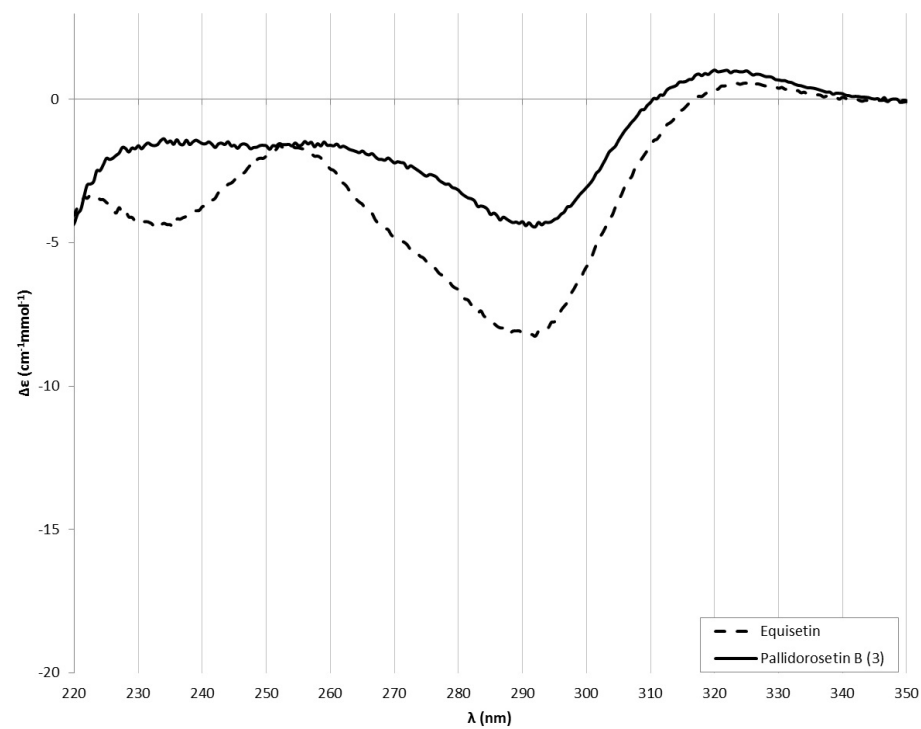

Supplement: np400761g_si_001.pdf [file np400761g_si_001.pdf]
